# Supplementary material for: Differential growth and flowering capacity of tulip bulbs and the potential involvement of PHOSPHATIDYLETHANOLAMINE-BINDING PROTEINS (PEBPs)
Source: Springer Nature journal article supplement (doi:10.1186/s13062-025-00625-y), 2025-03-10

**Supplementary File 1. Pairwise GO analysis of up- and down-regulated genes.**

Each plot name indicates which transcriptomes are compared (Number of WAP = Weeks After Planting; F = Flowering bulbs, NF = non-flowering bulbs; the < and > signs show which of the two samples has the higher expression). In each plot, the top 25 enriched GO terms are shown. Differential gene expression was performed using the Wald test ( $p < 0.05$ ). Annotations are based on the closest Arabidopsis gene (Blastp, e-value  $< 10^{-5}$ ).

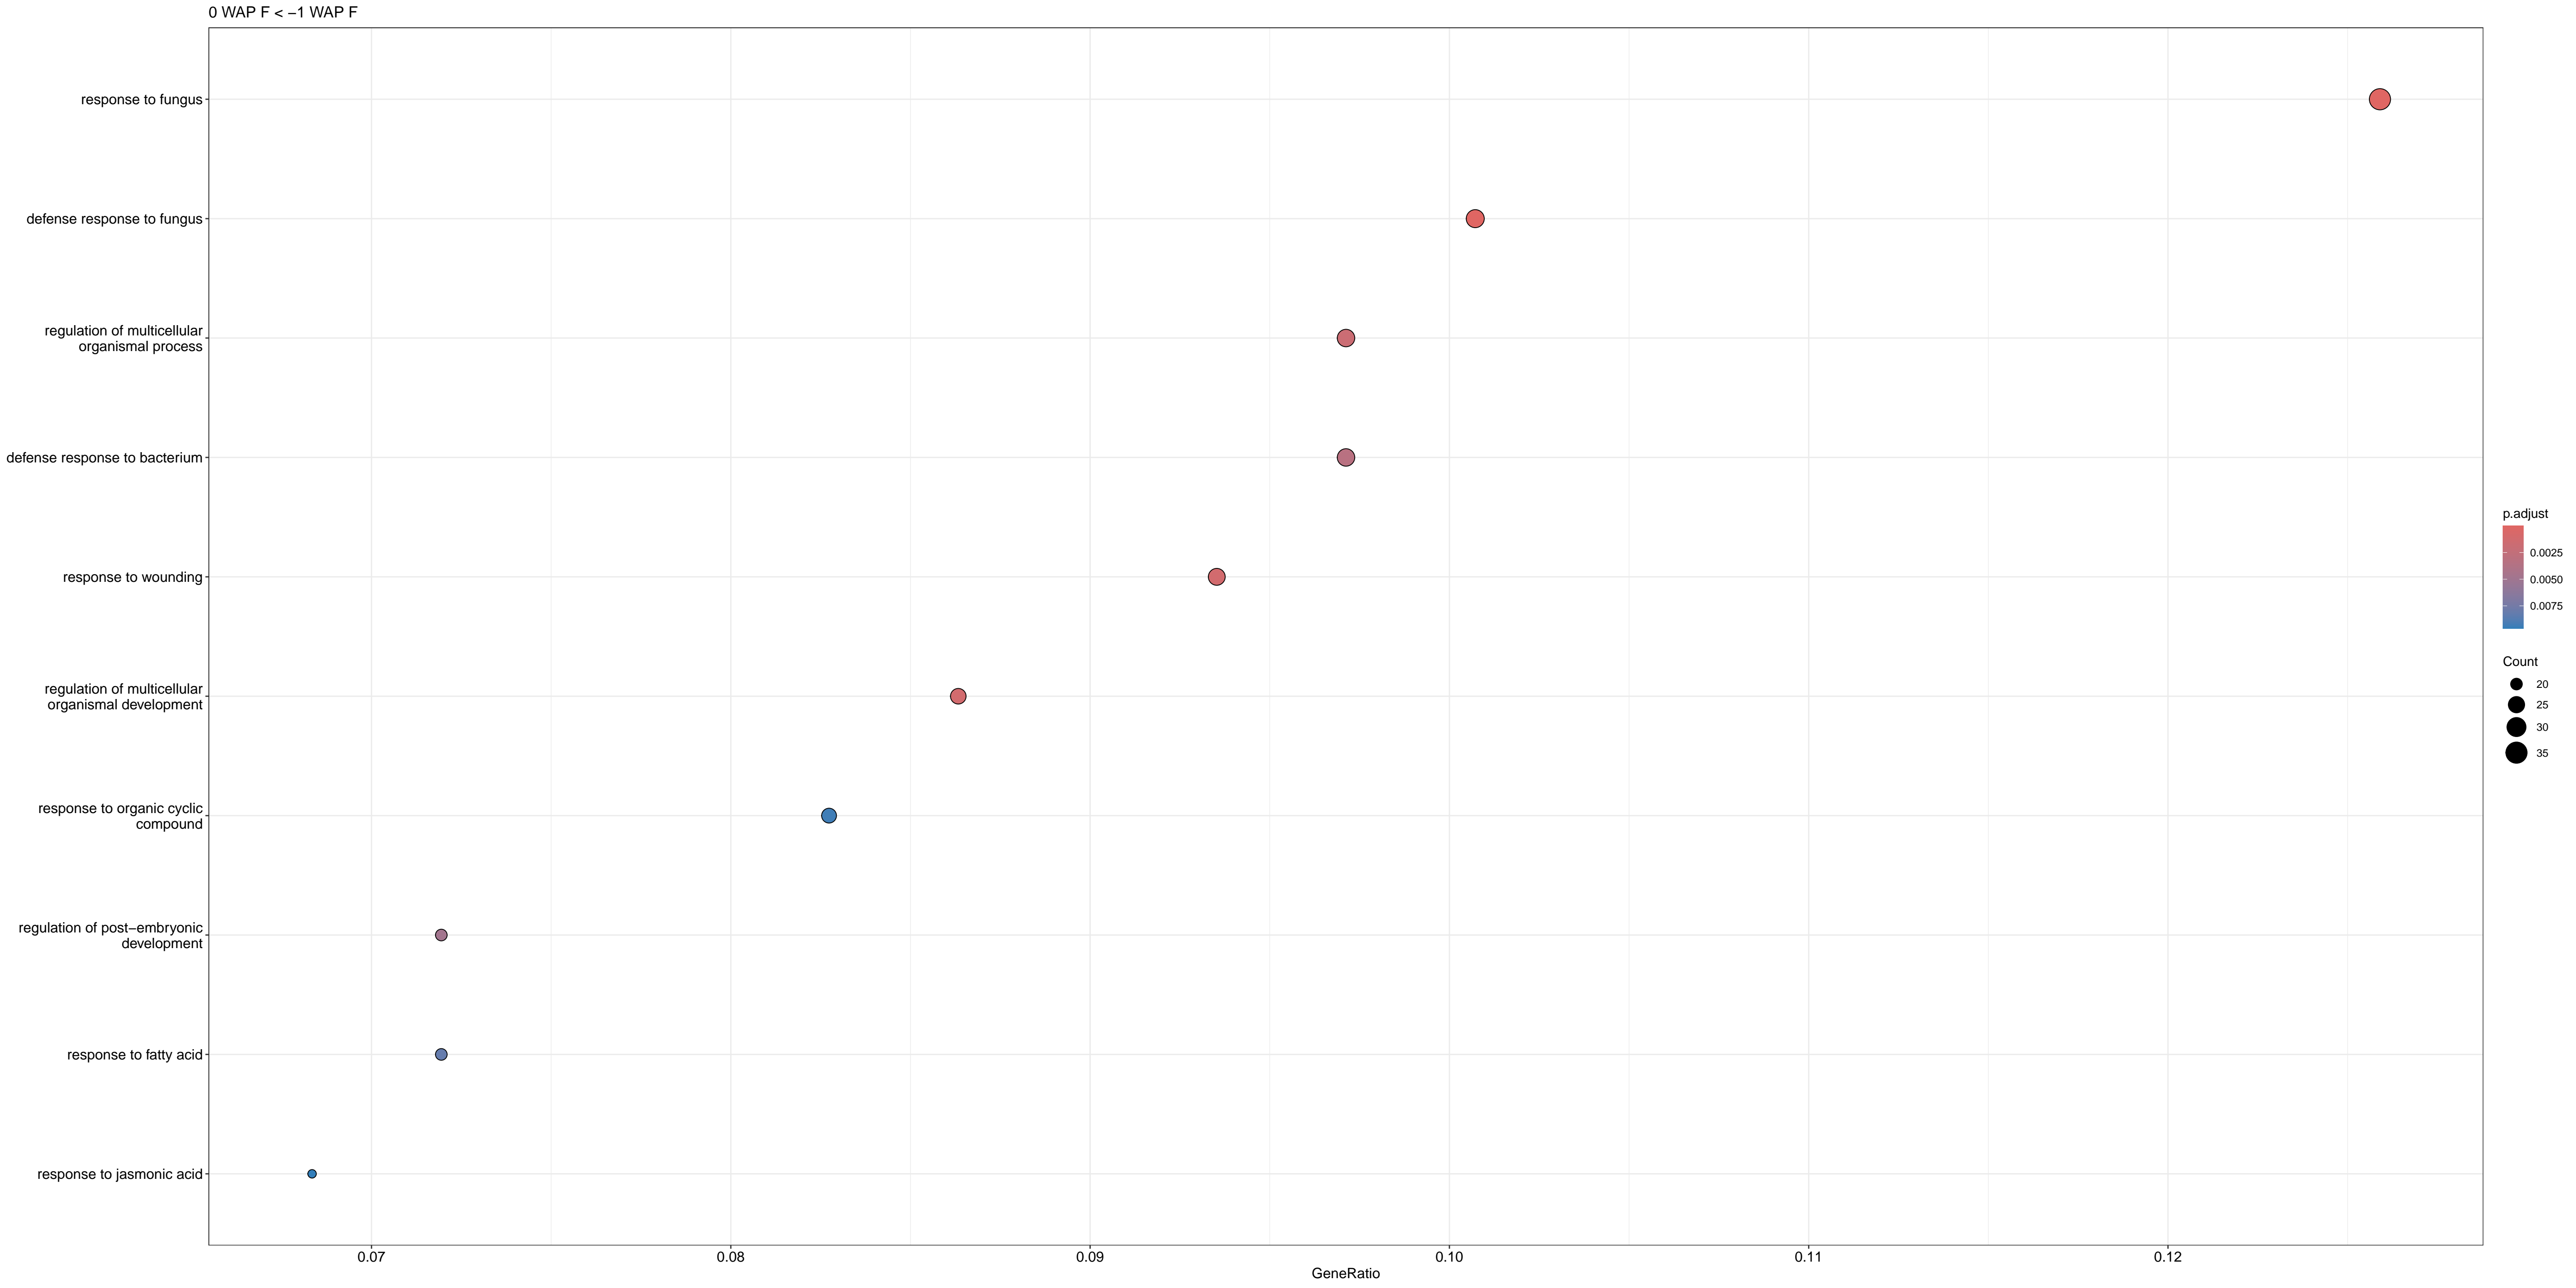

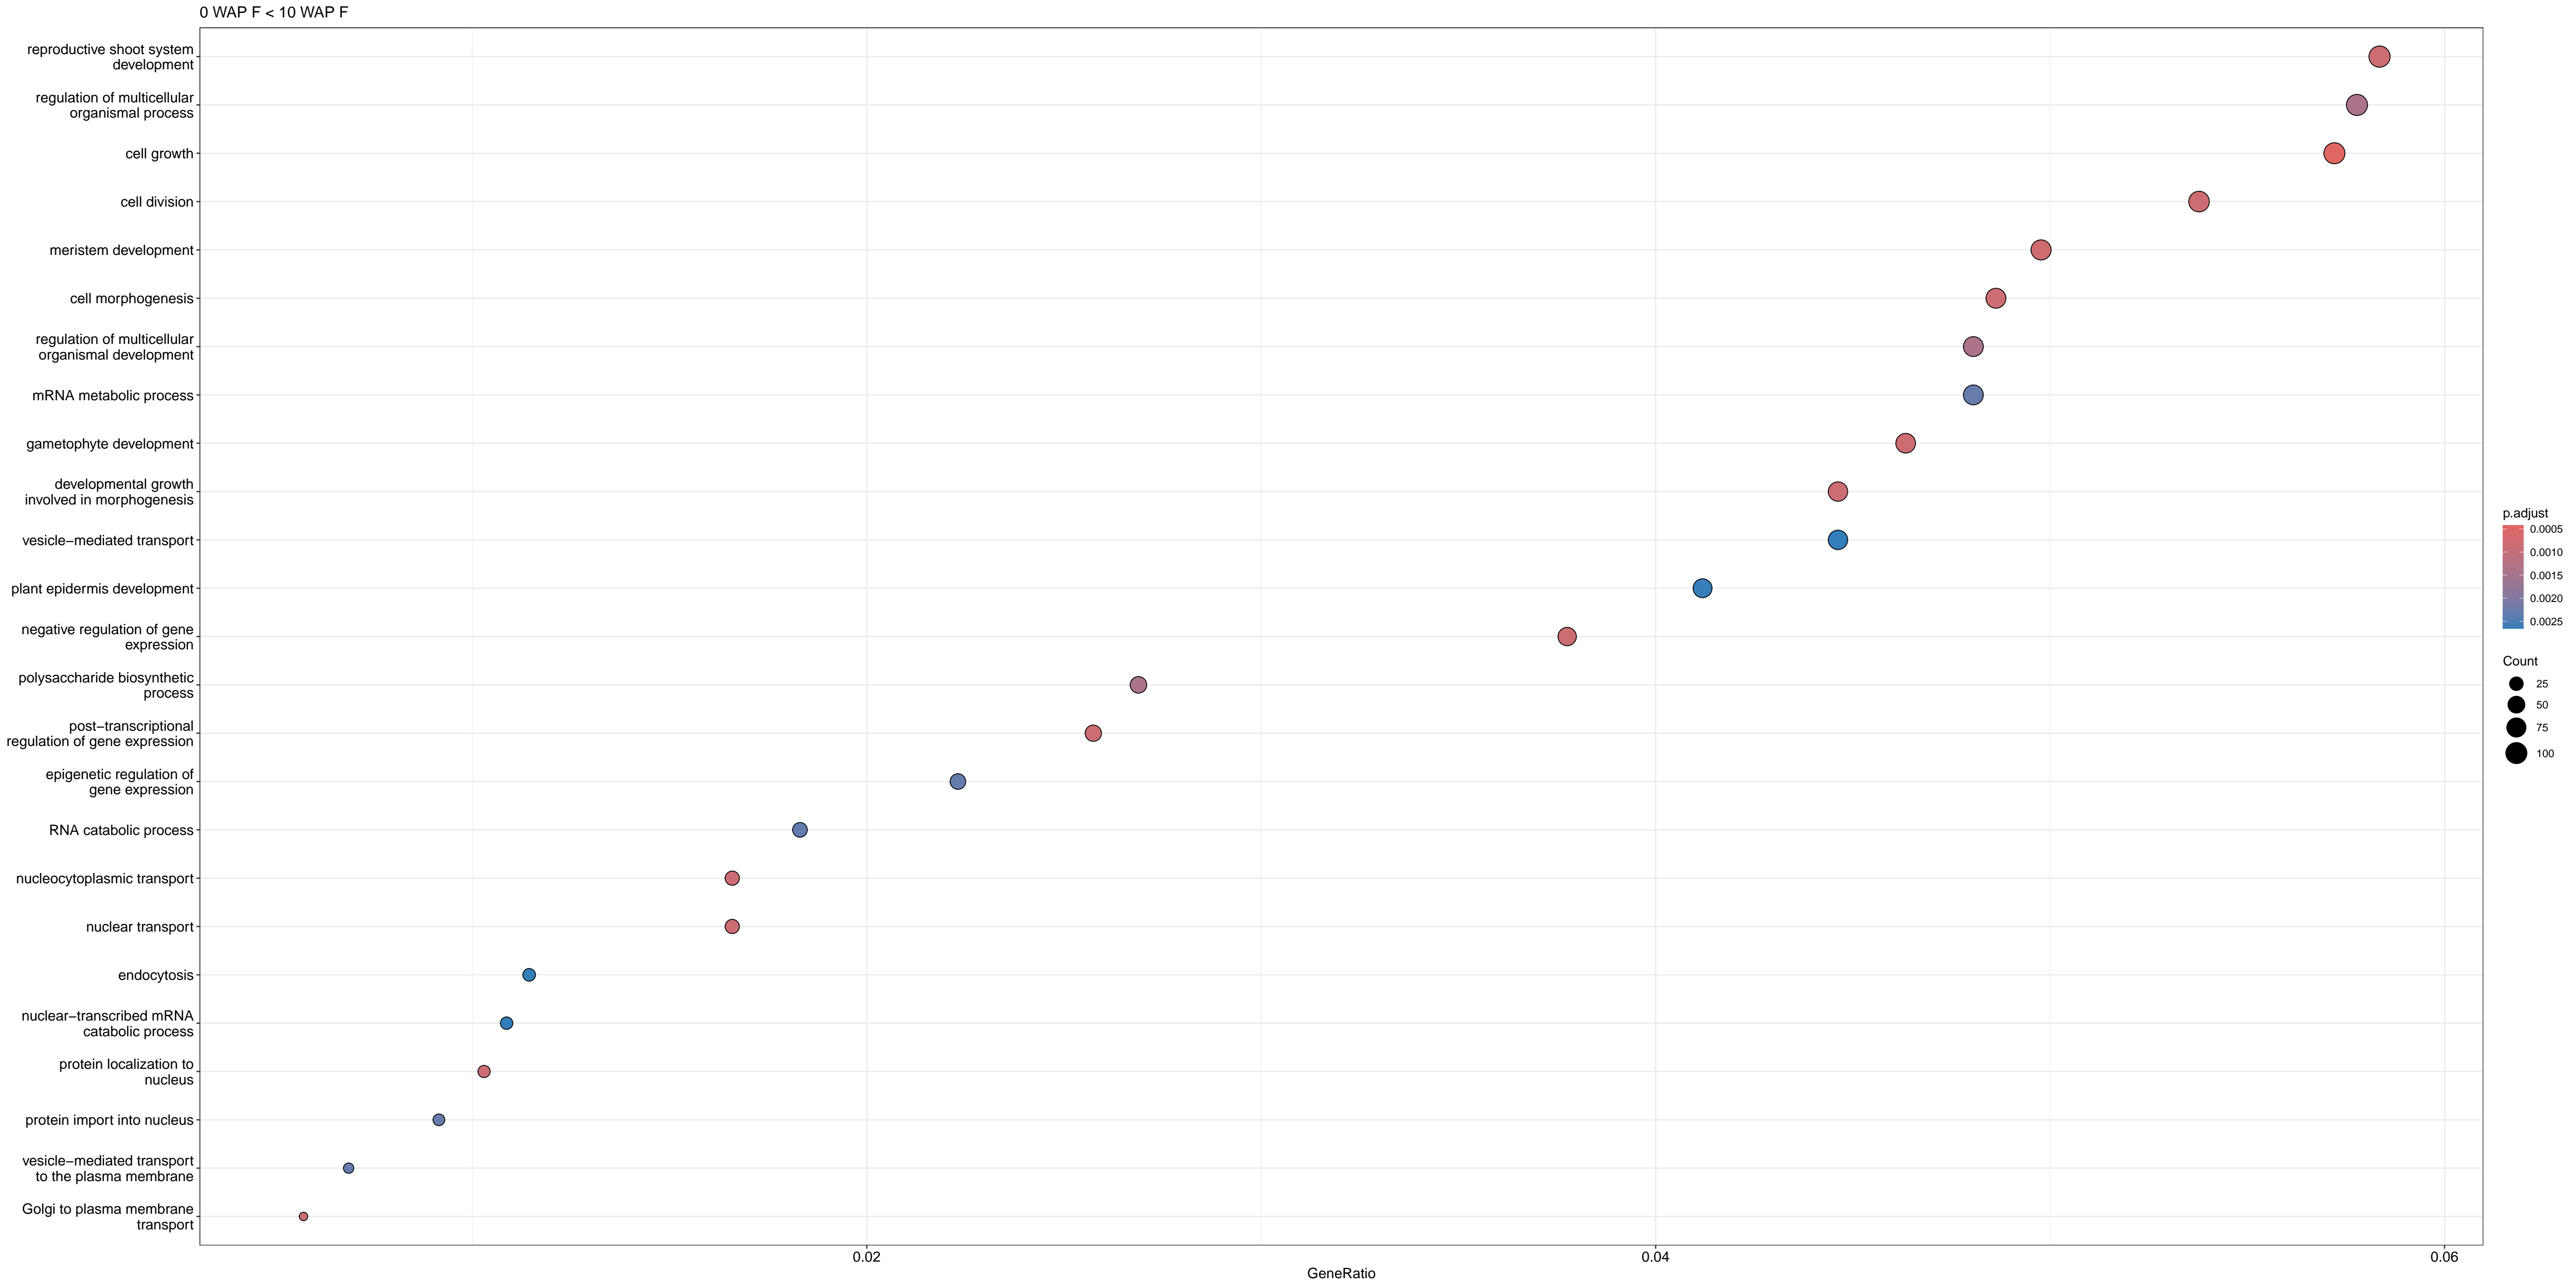

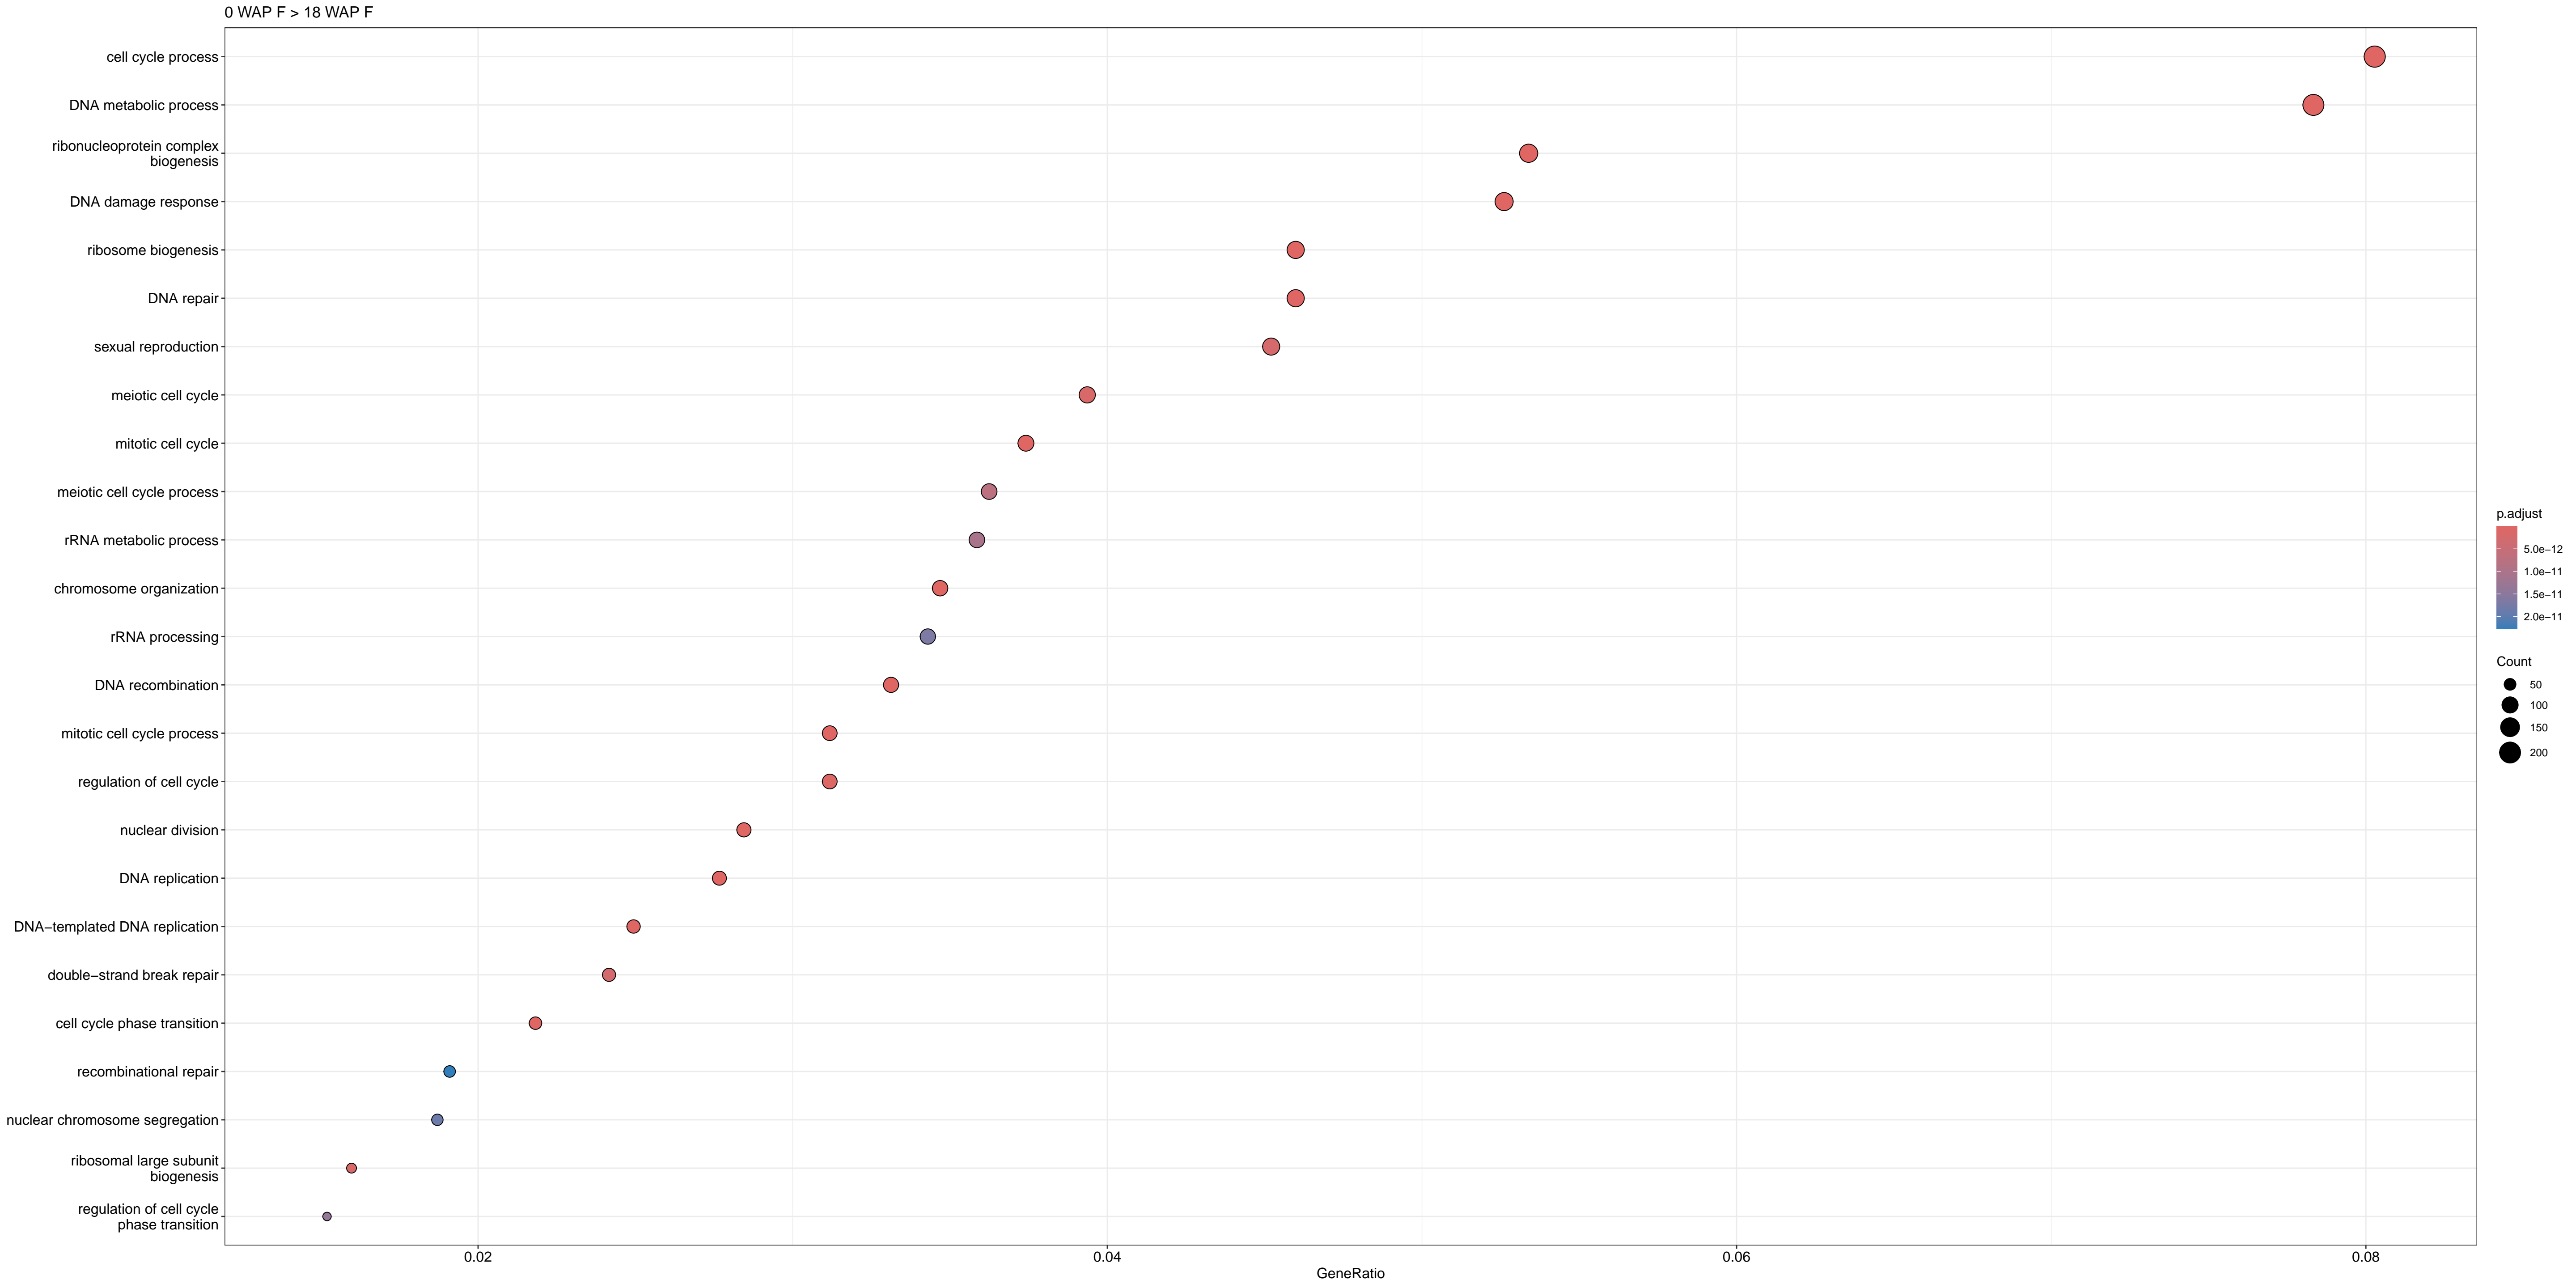

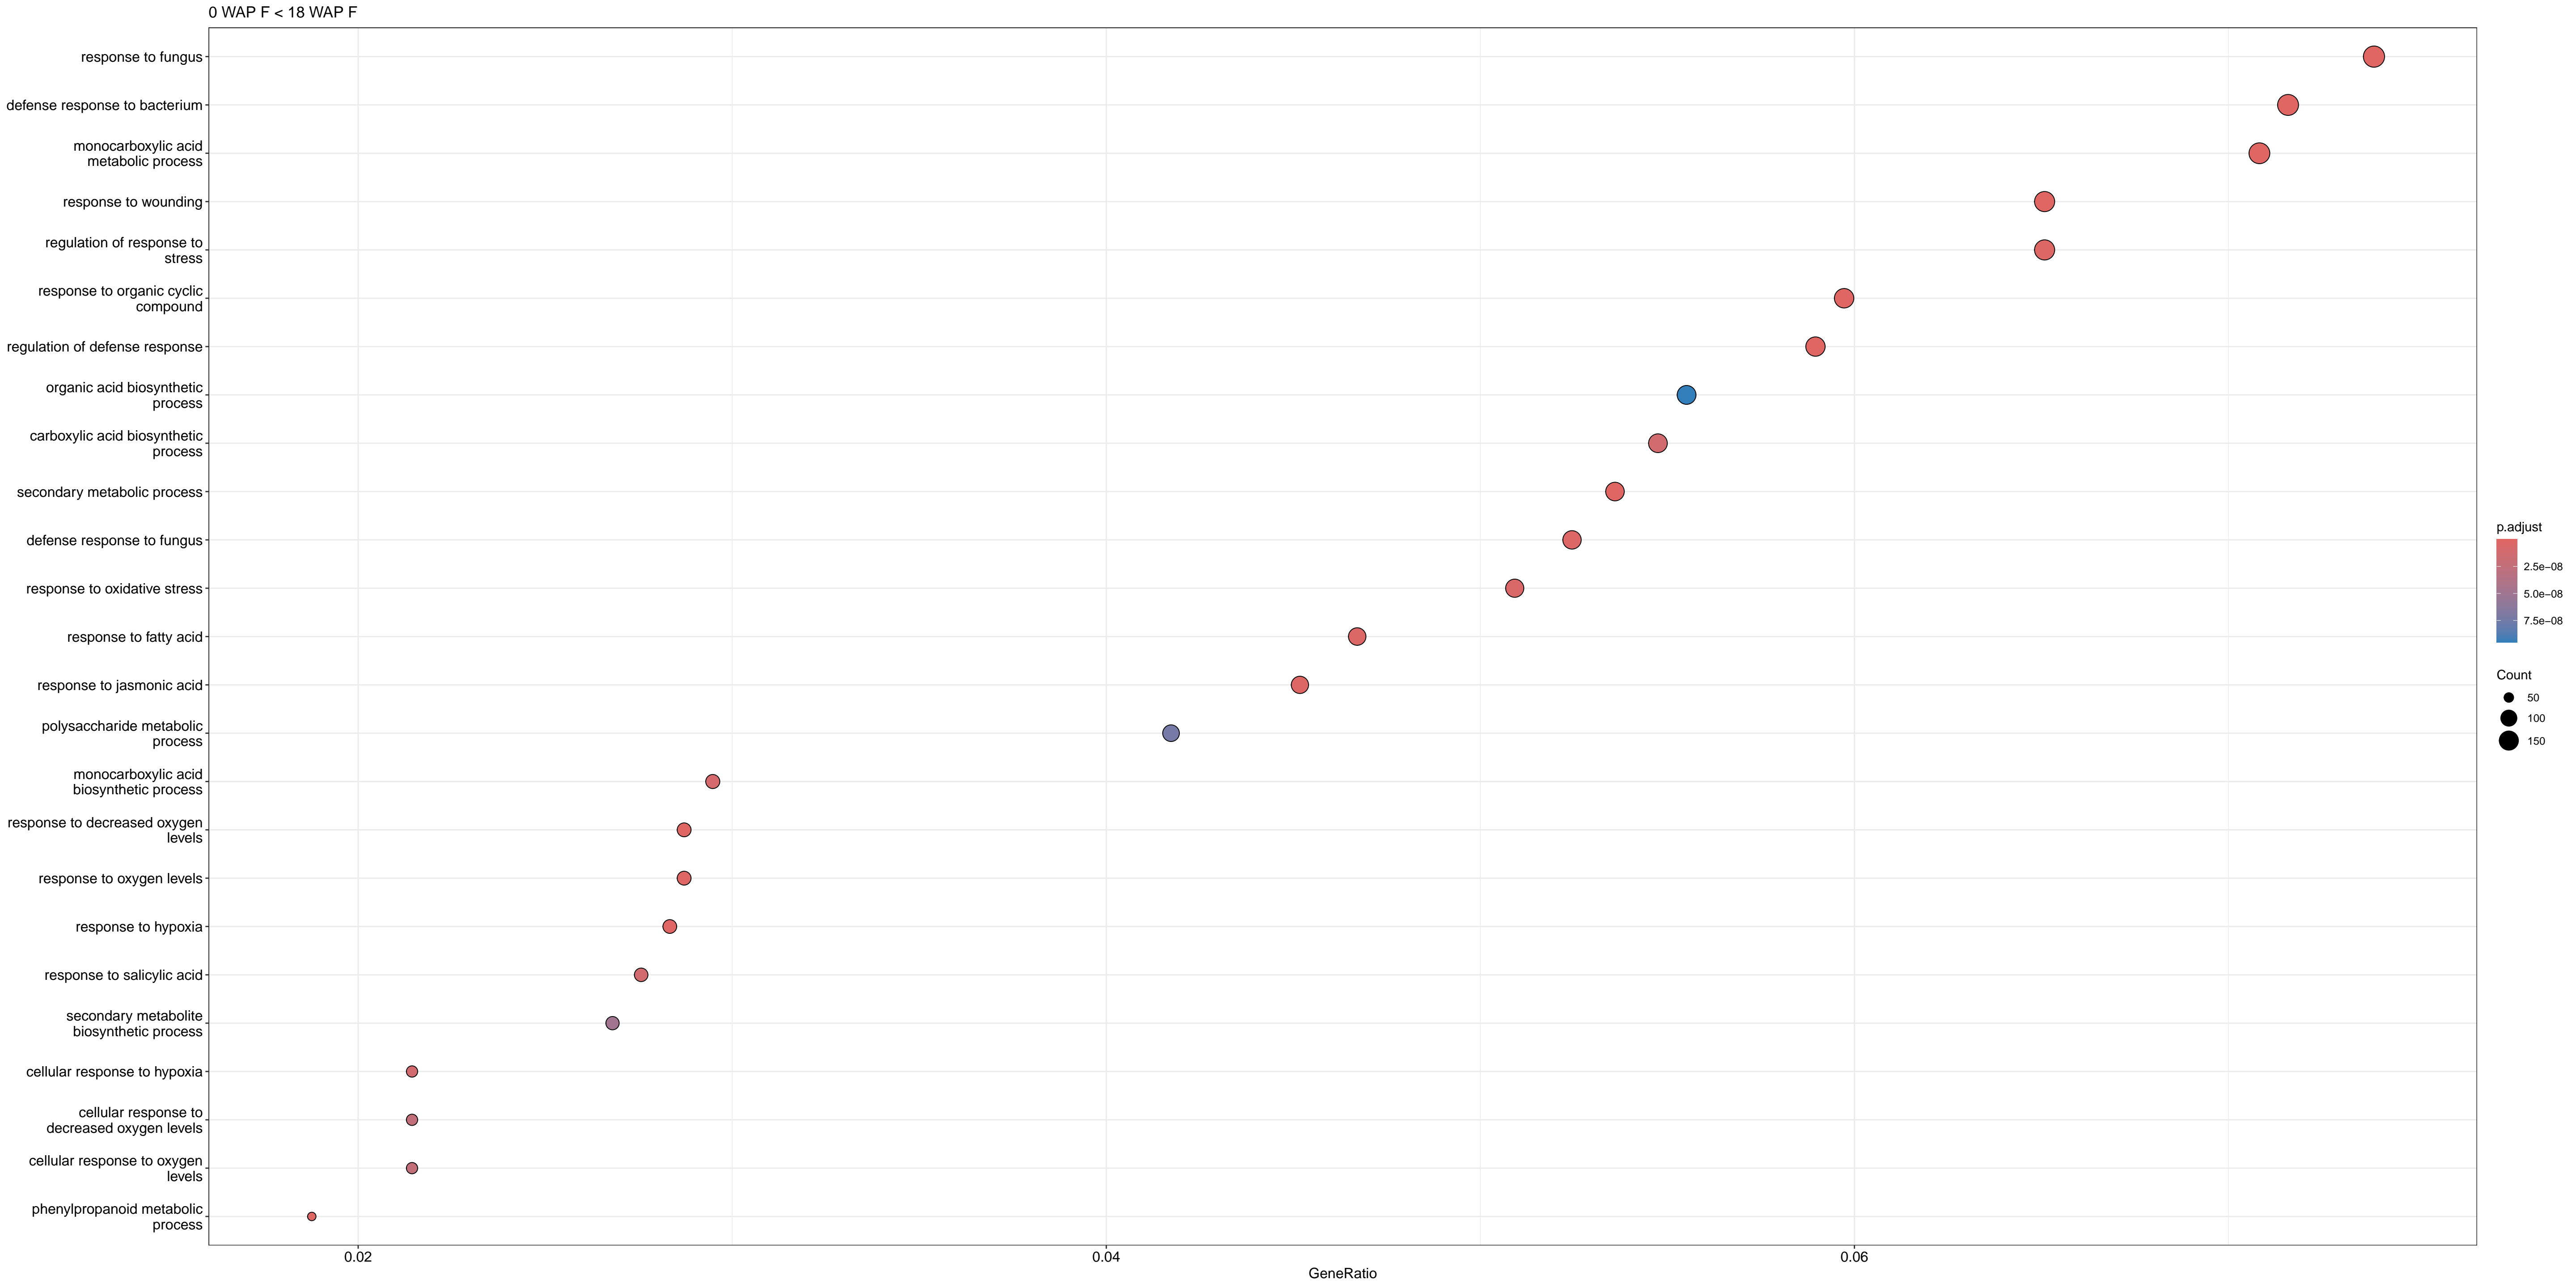

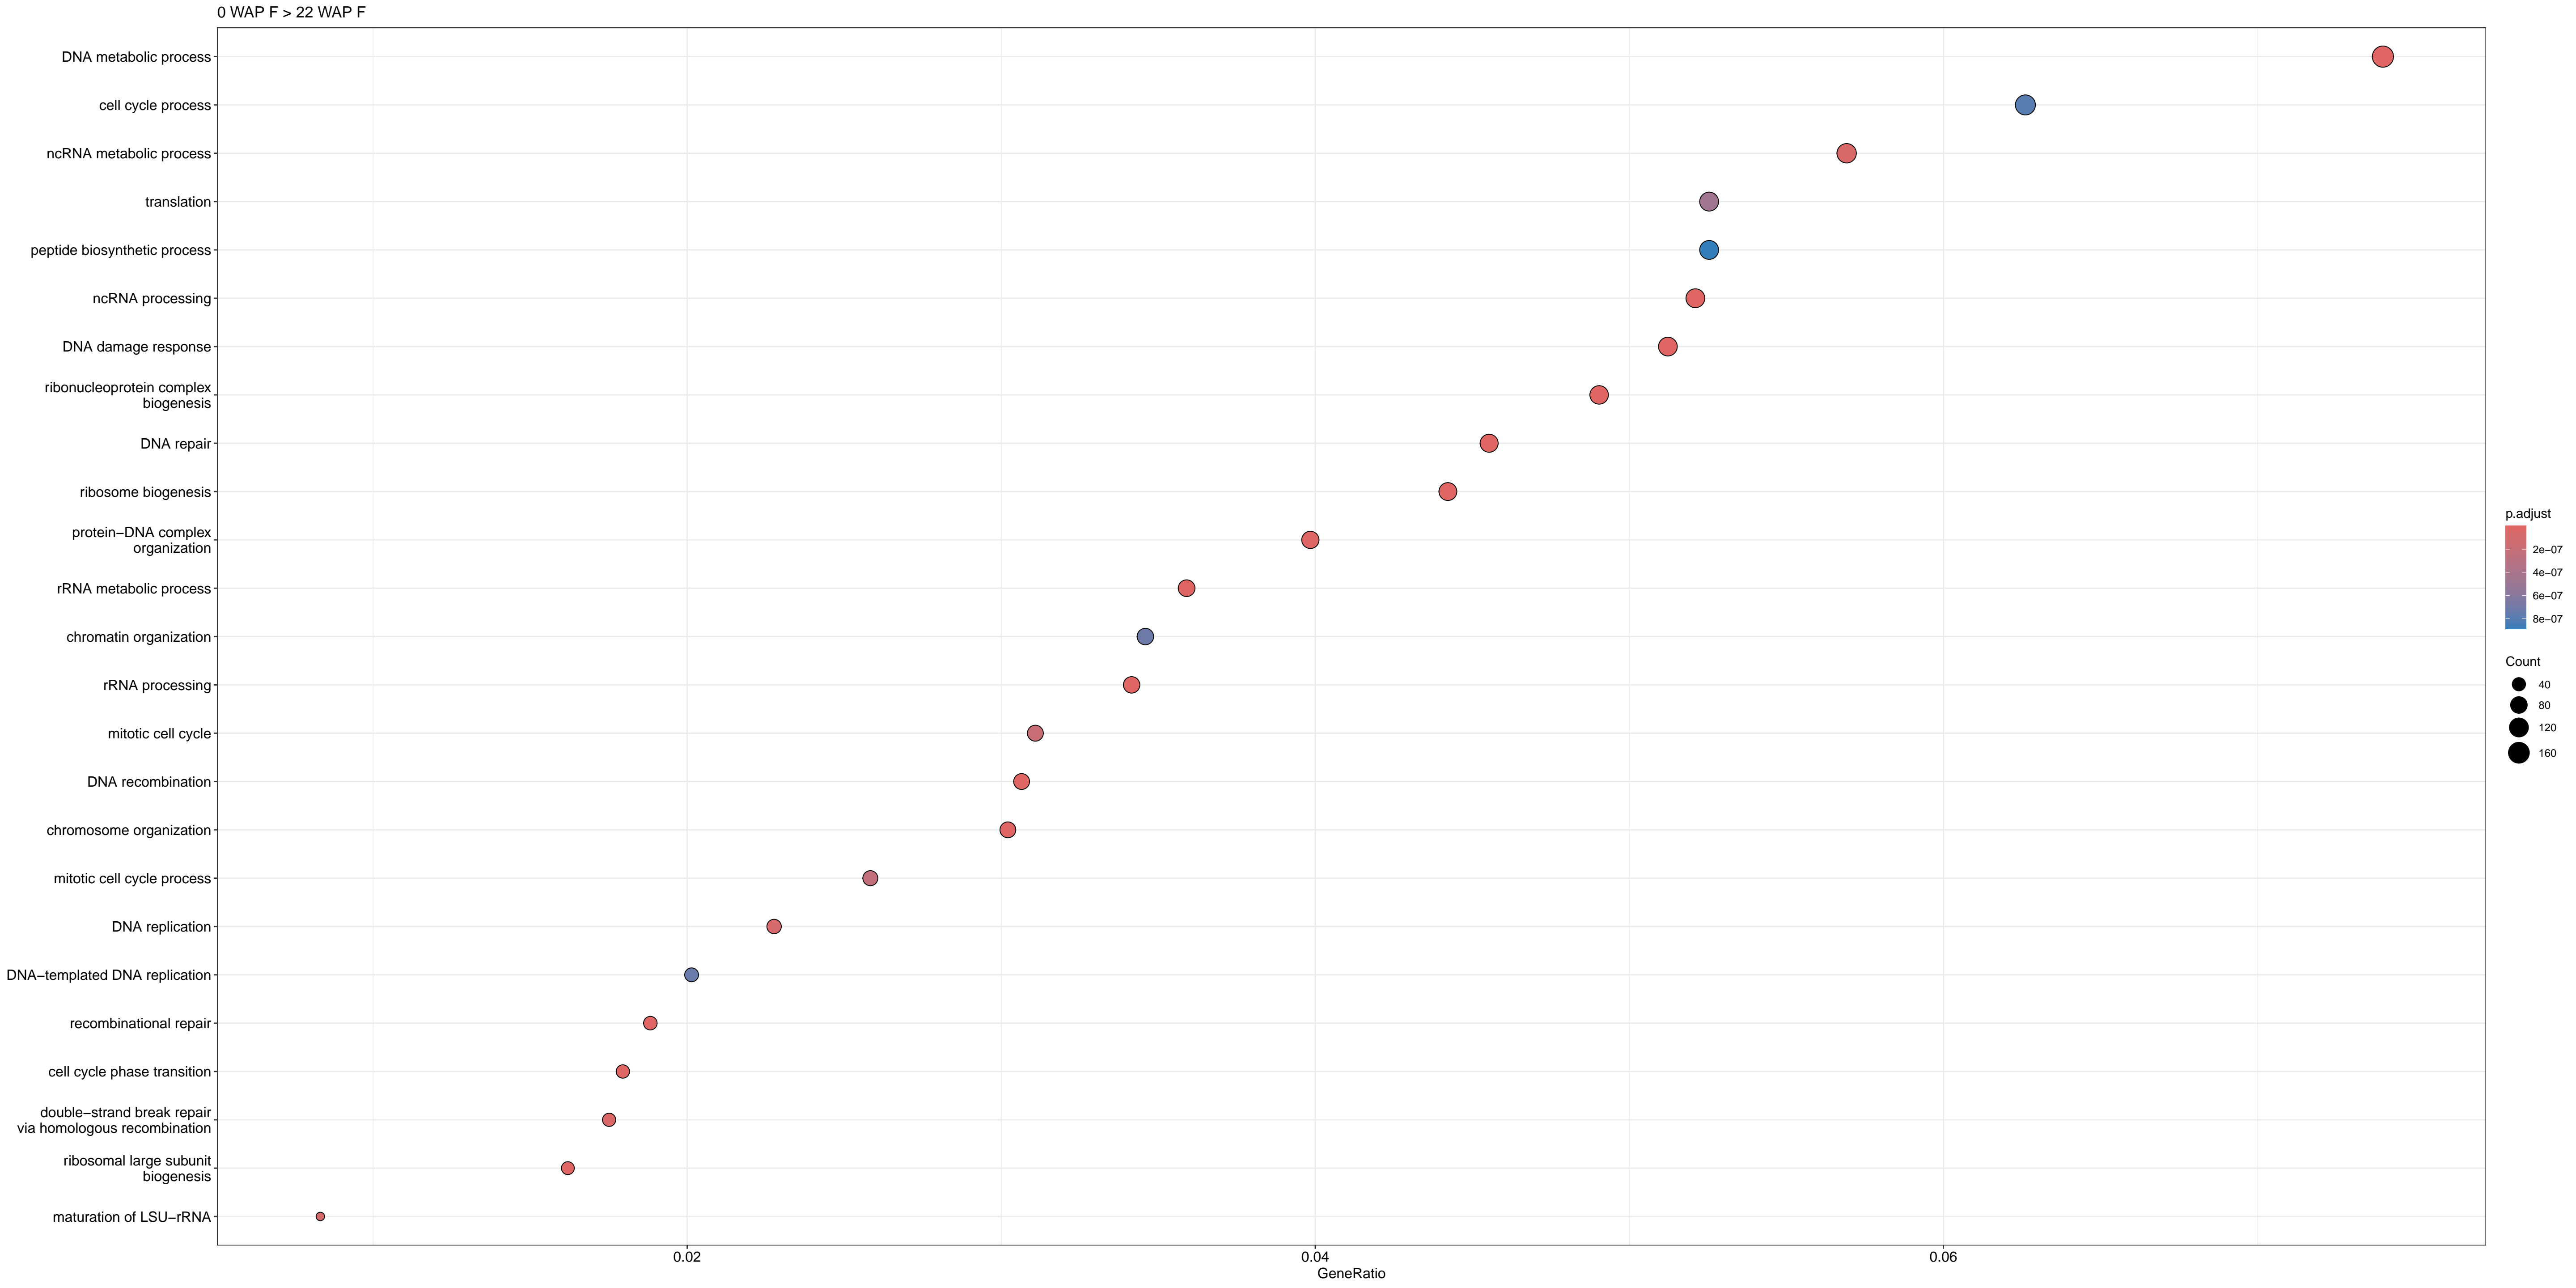

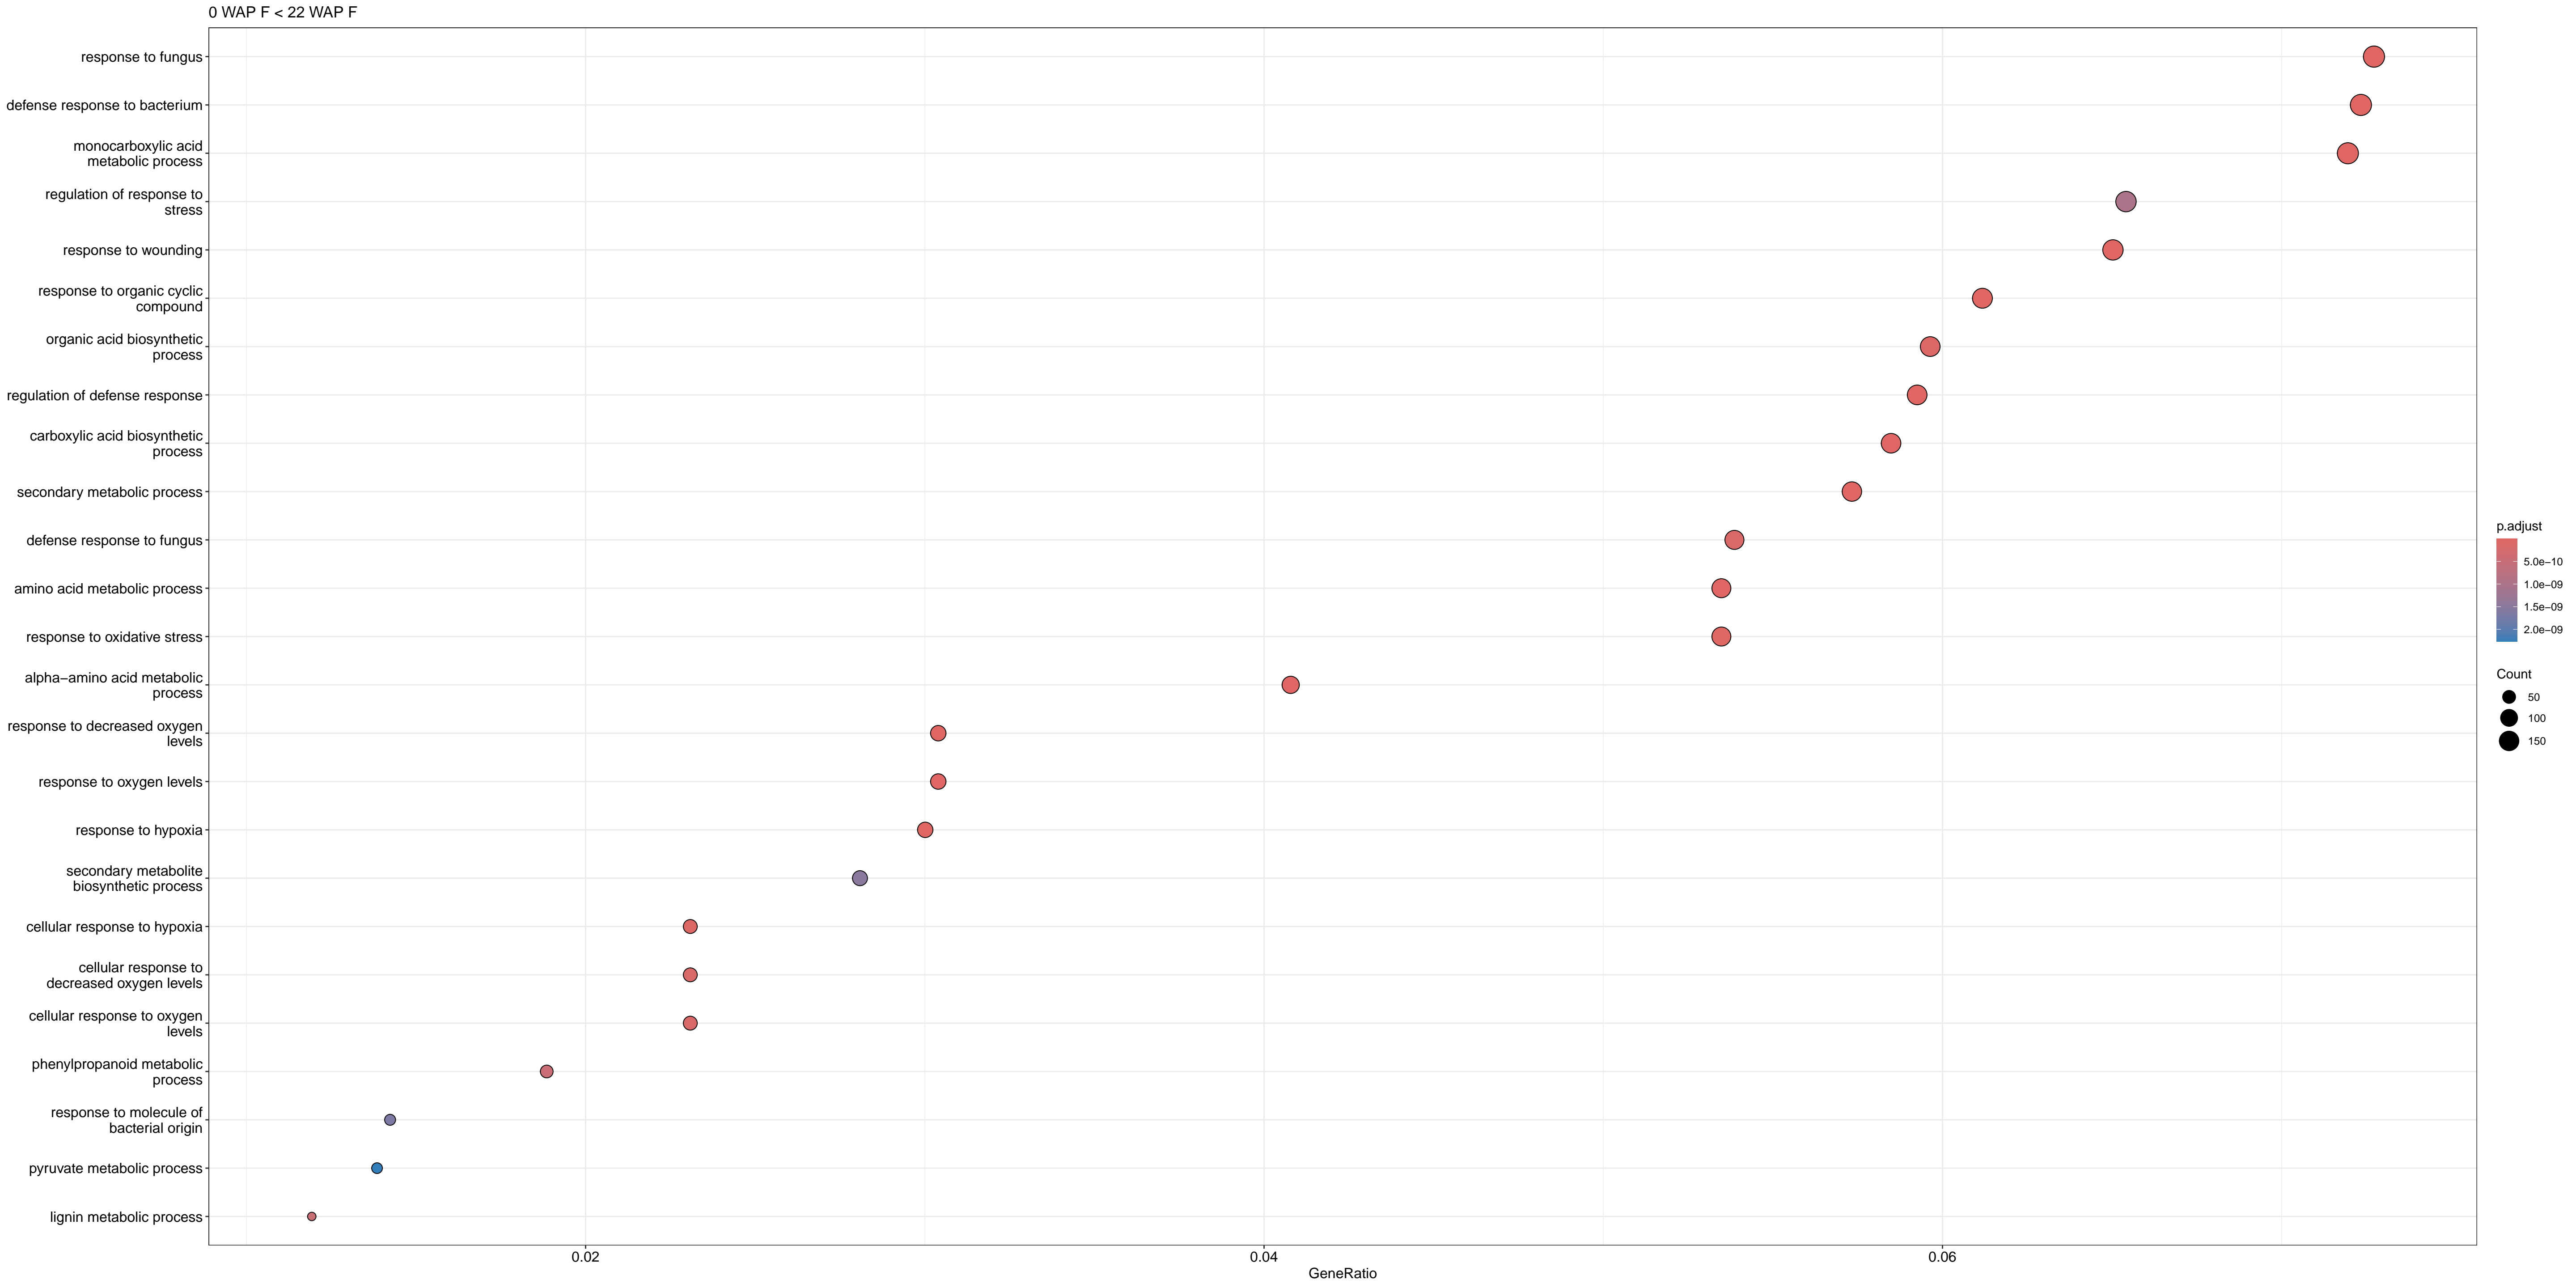

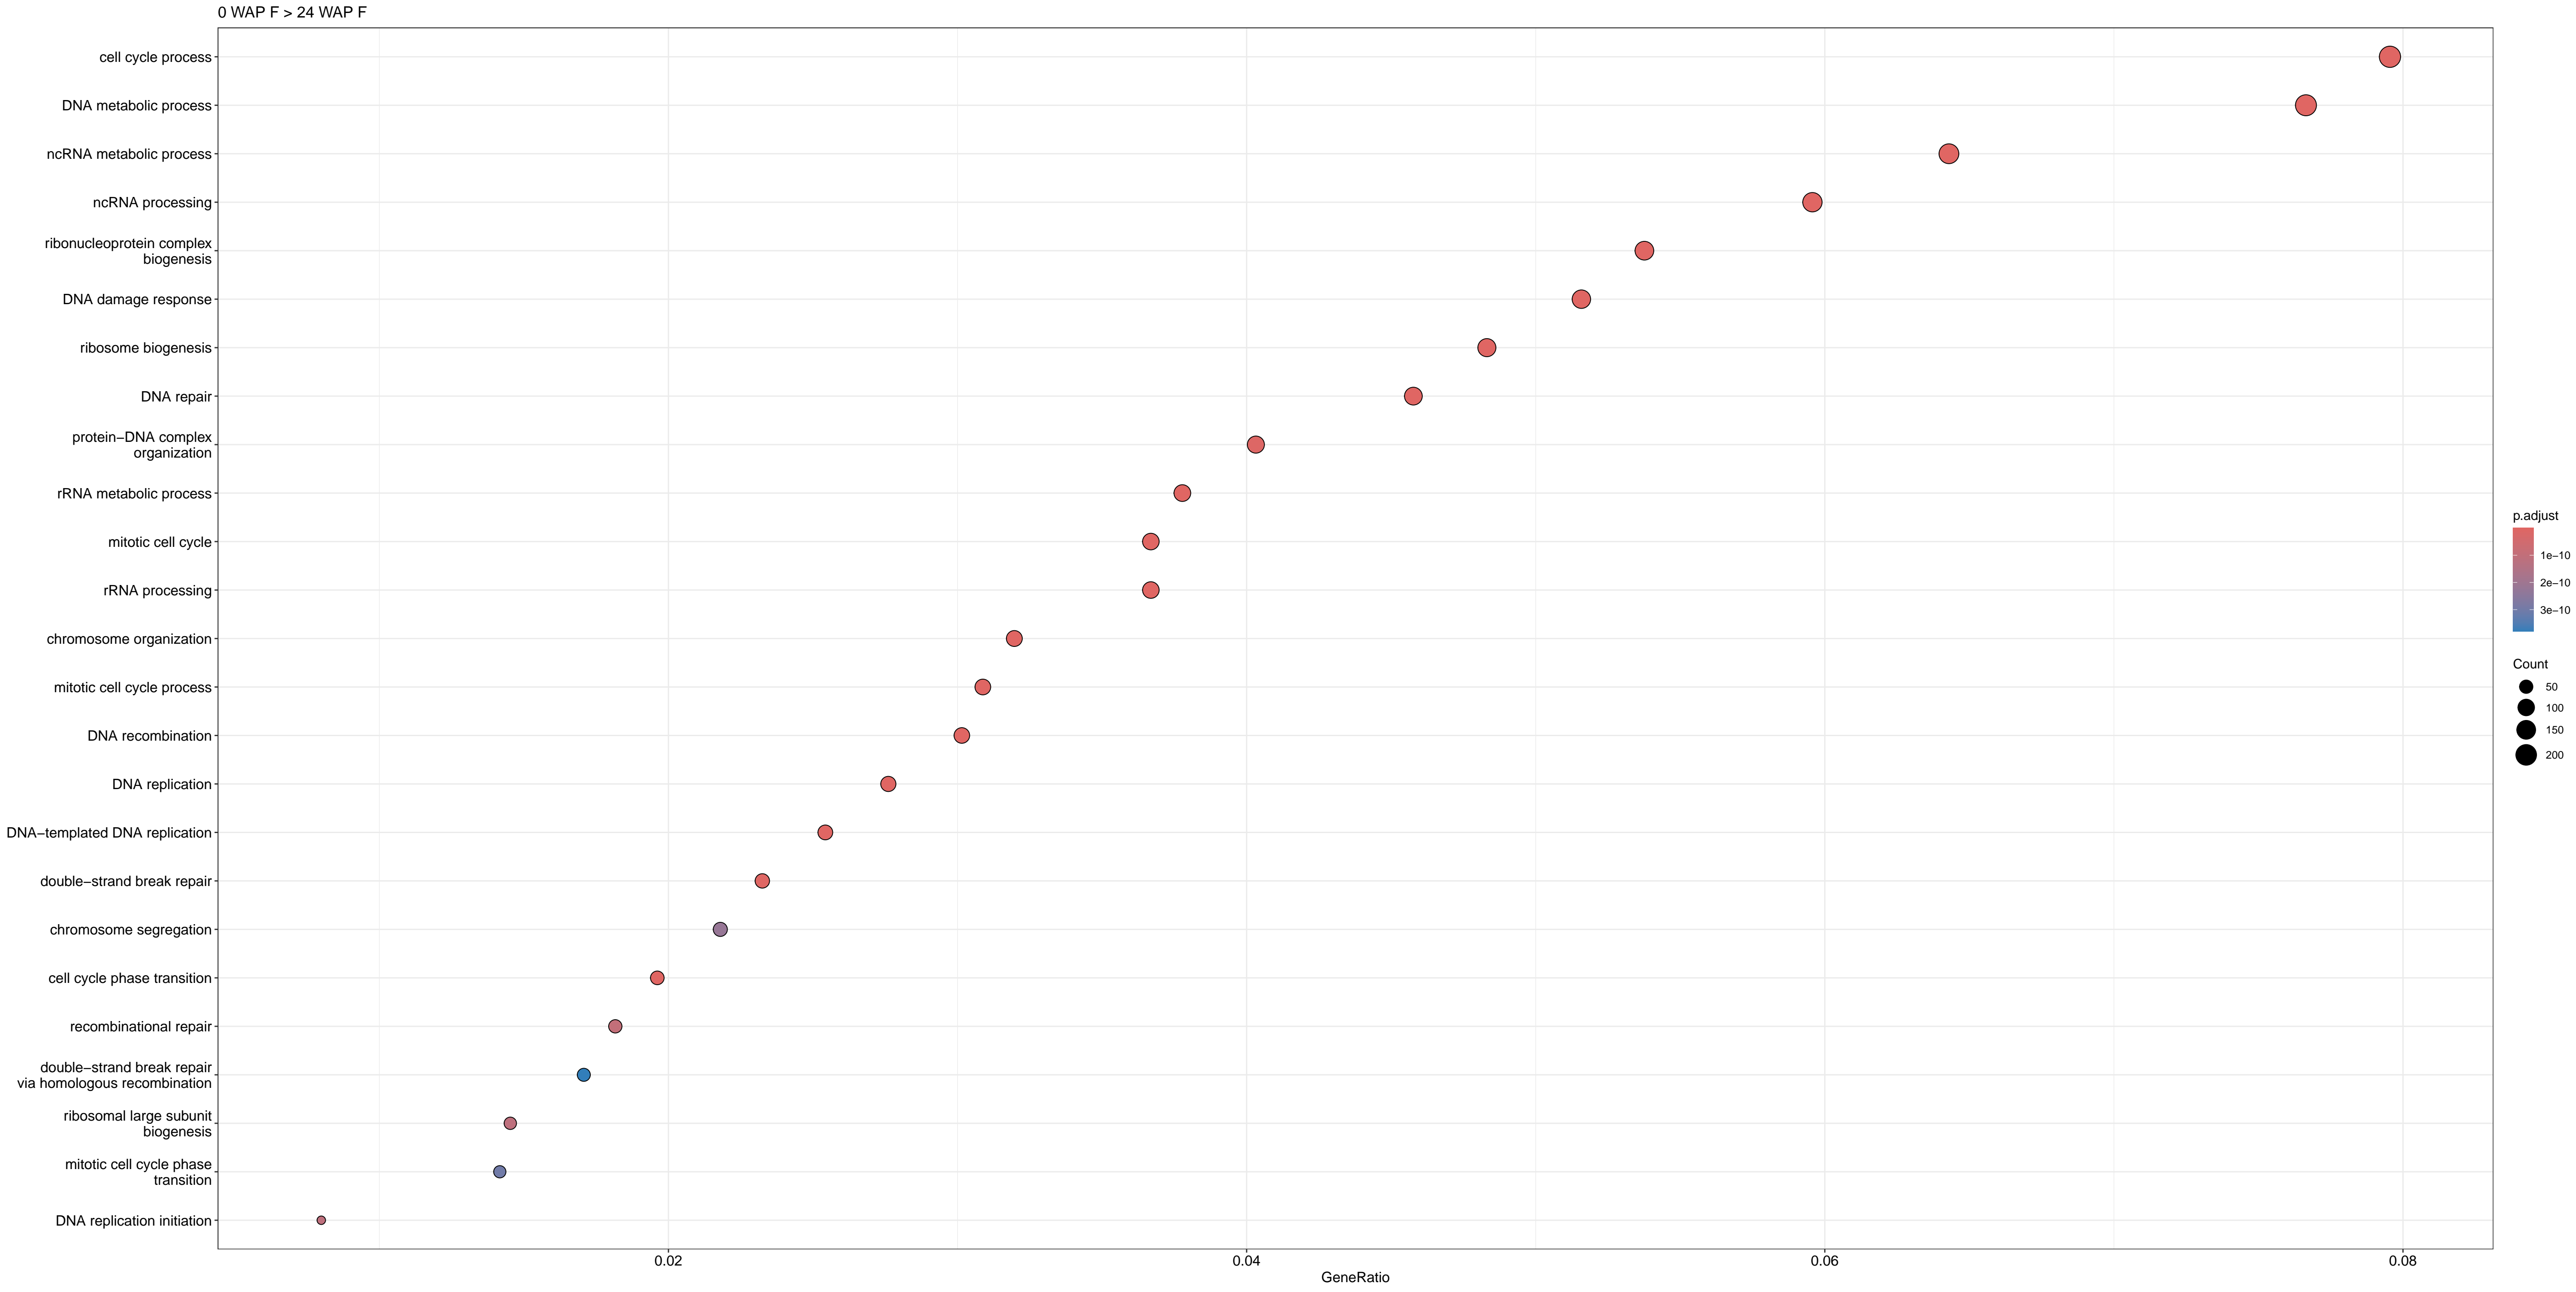



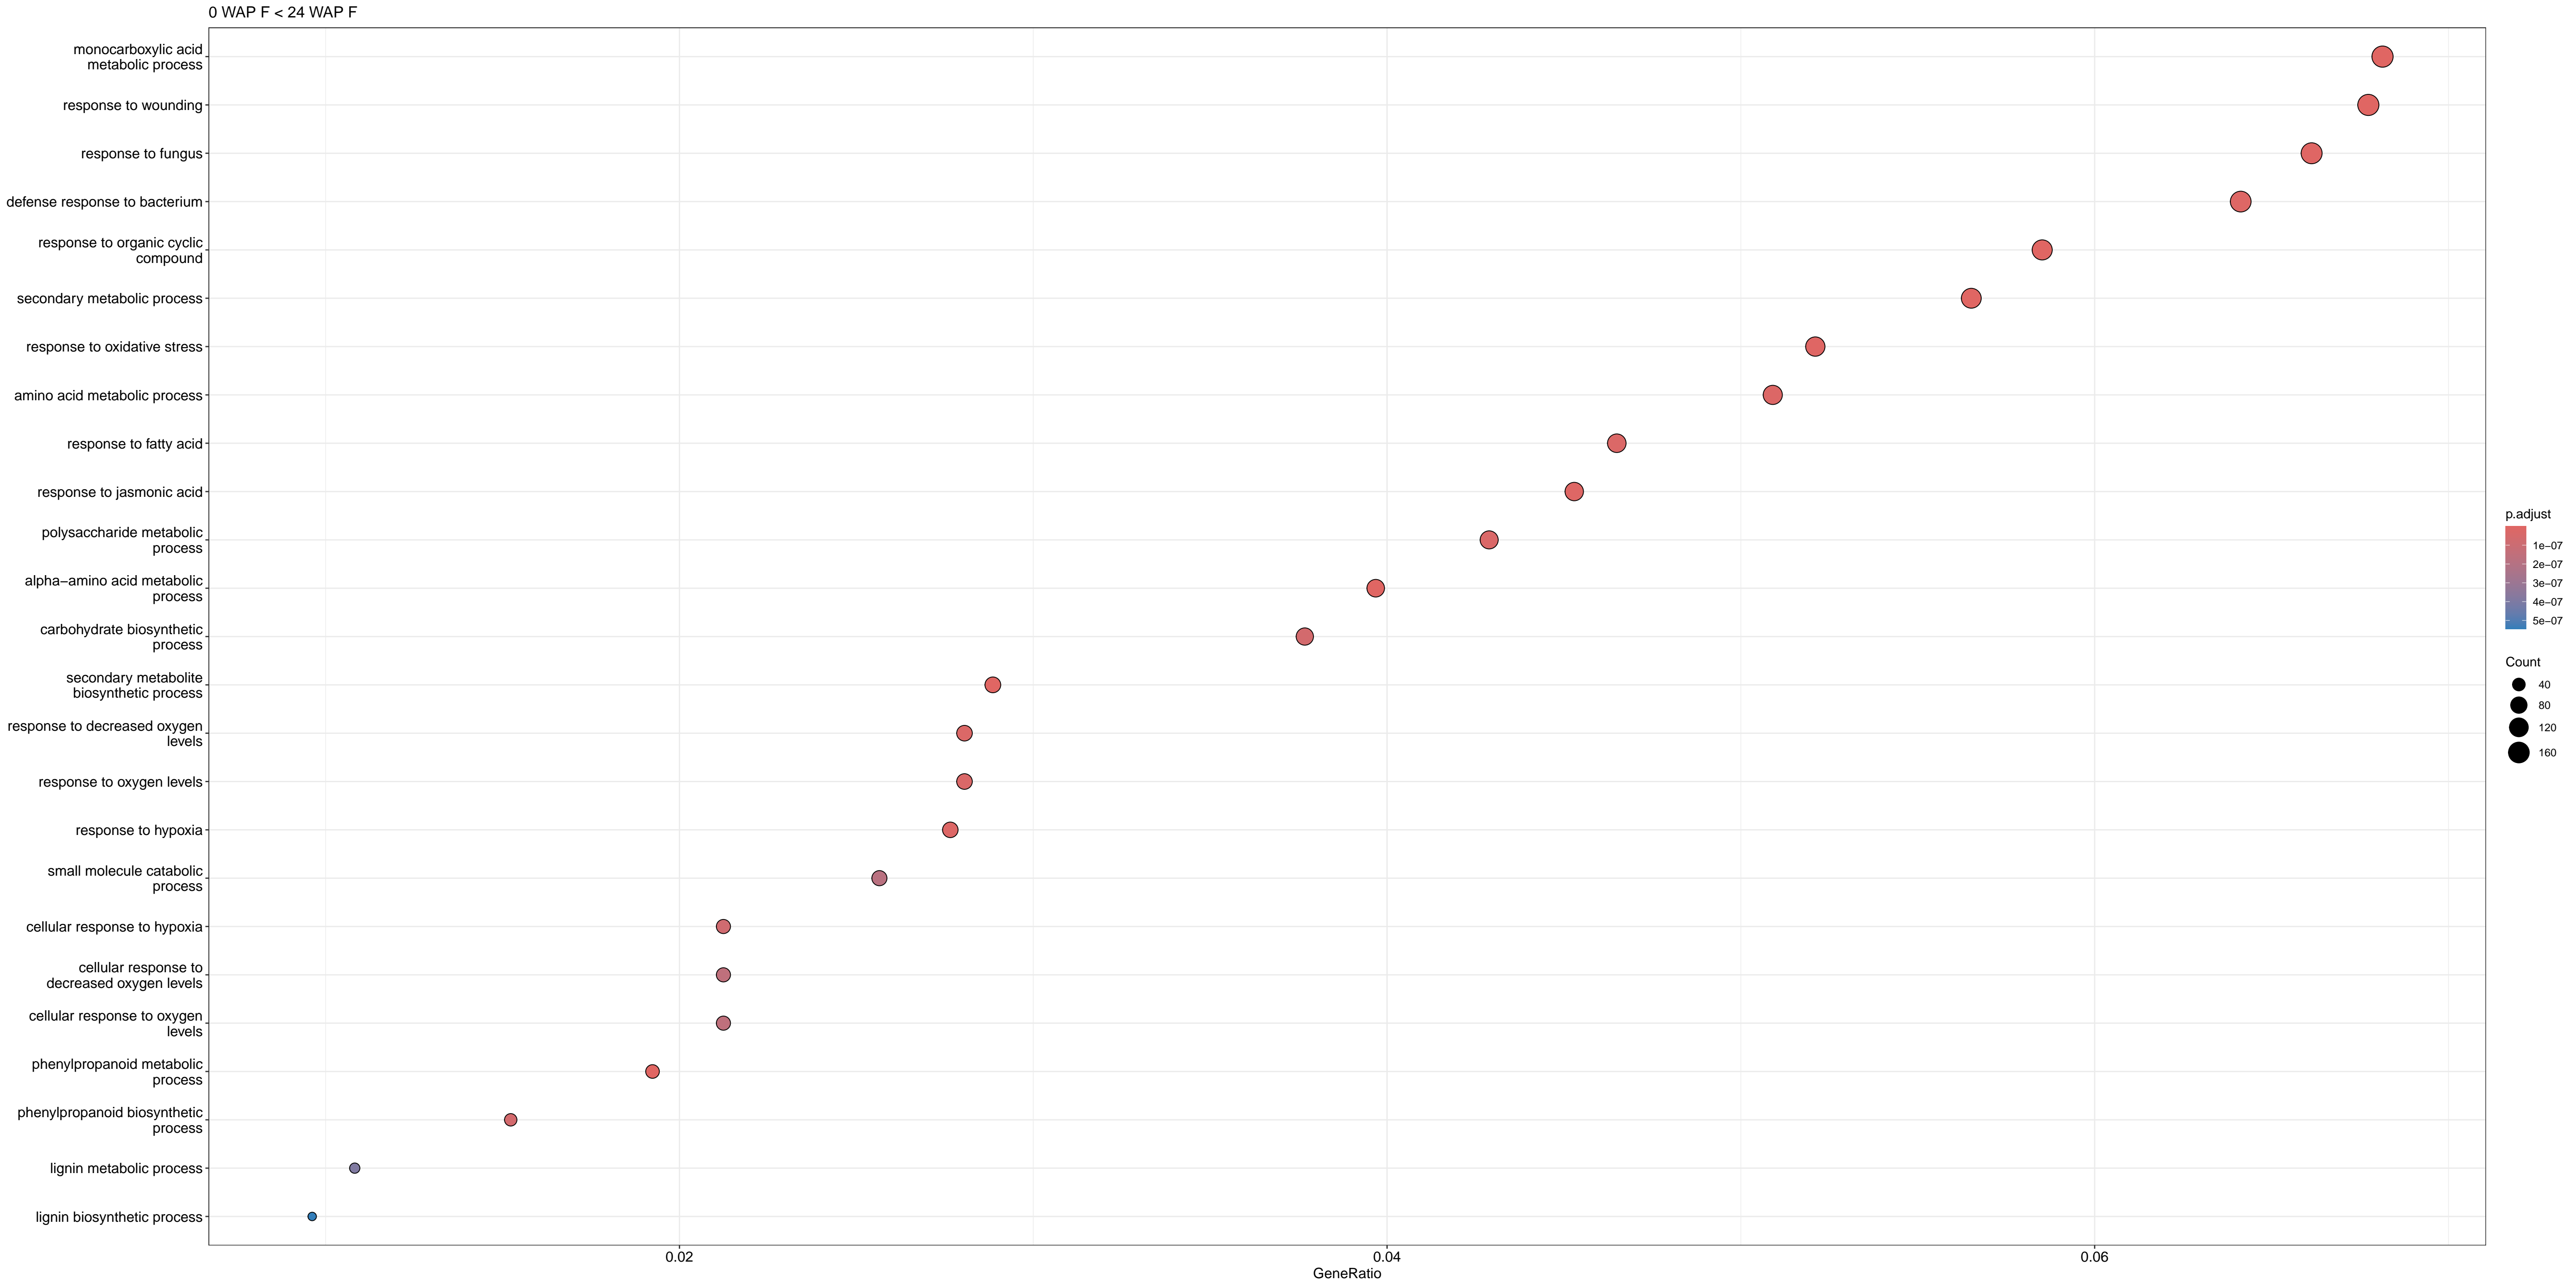

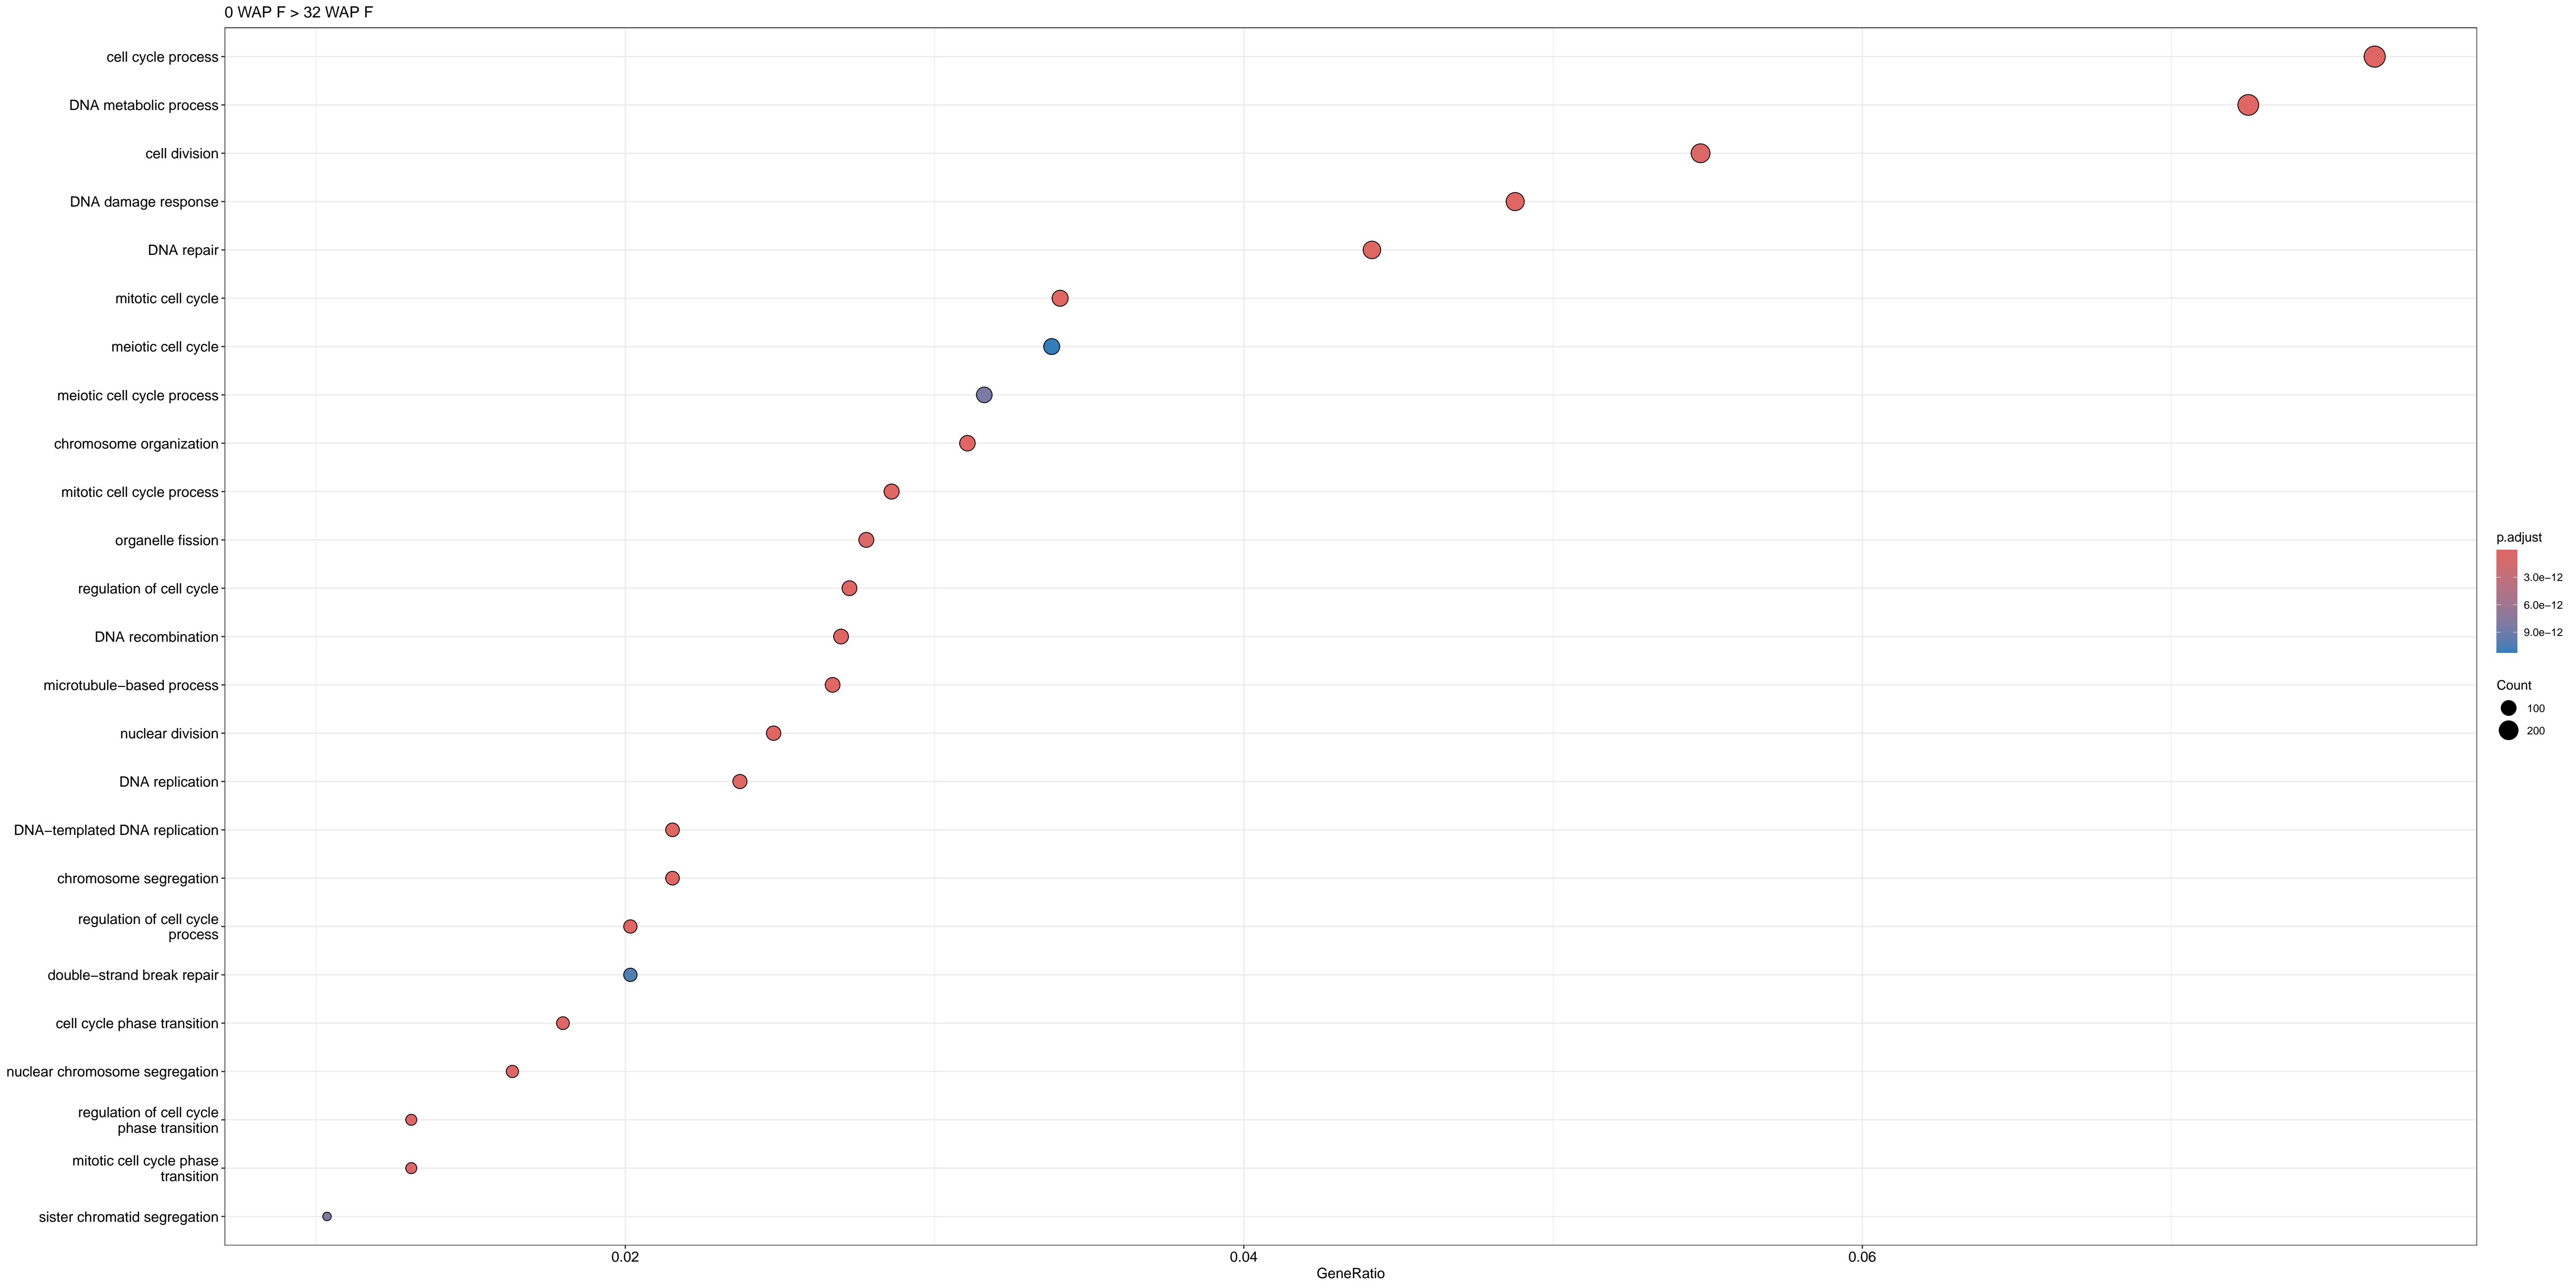

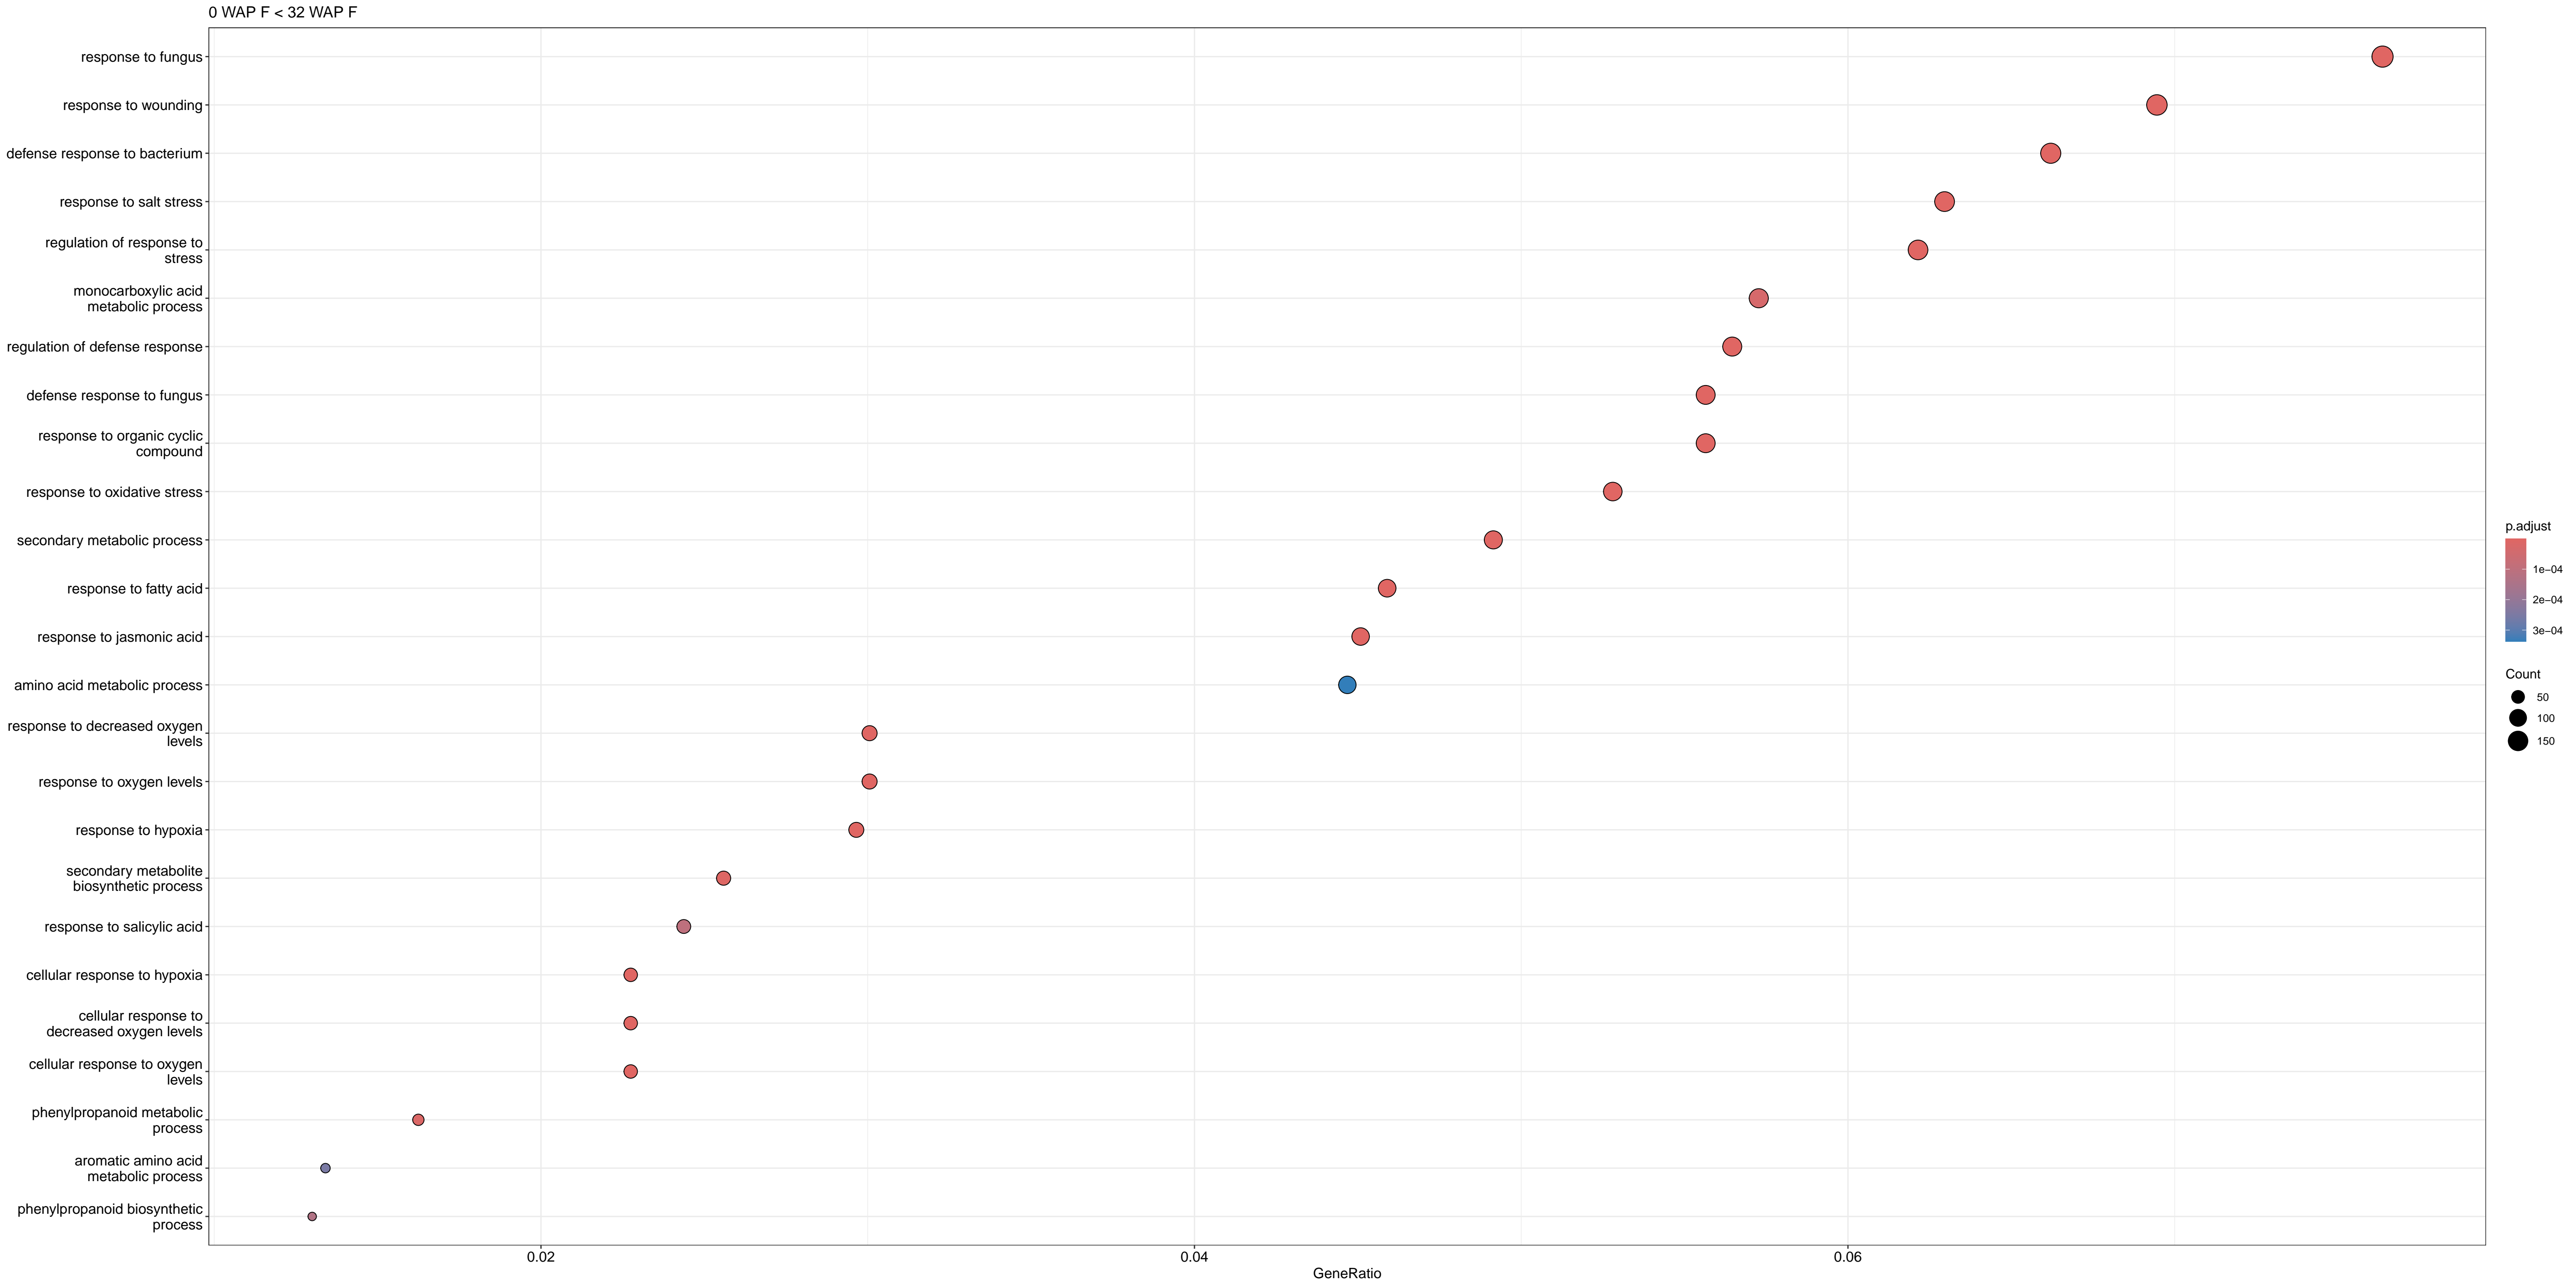

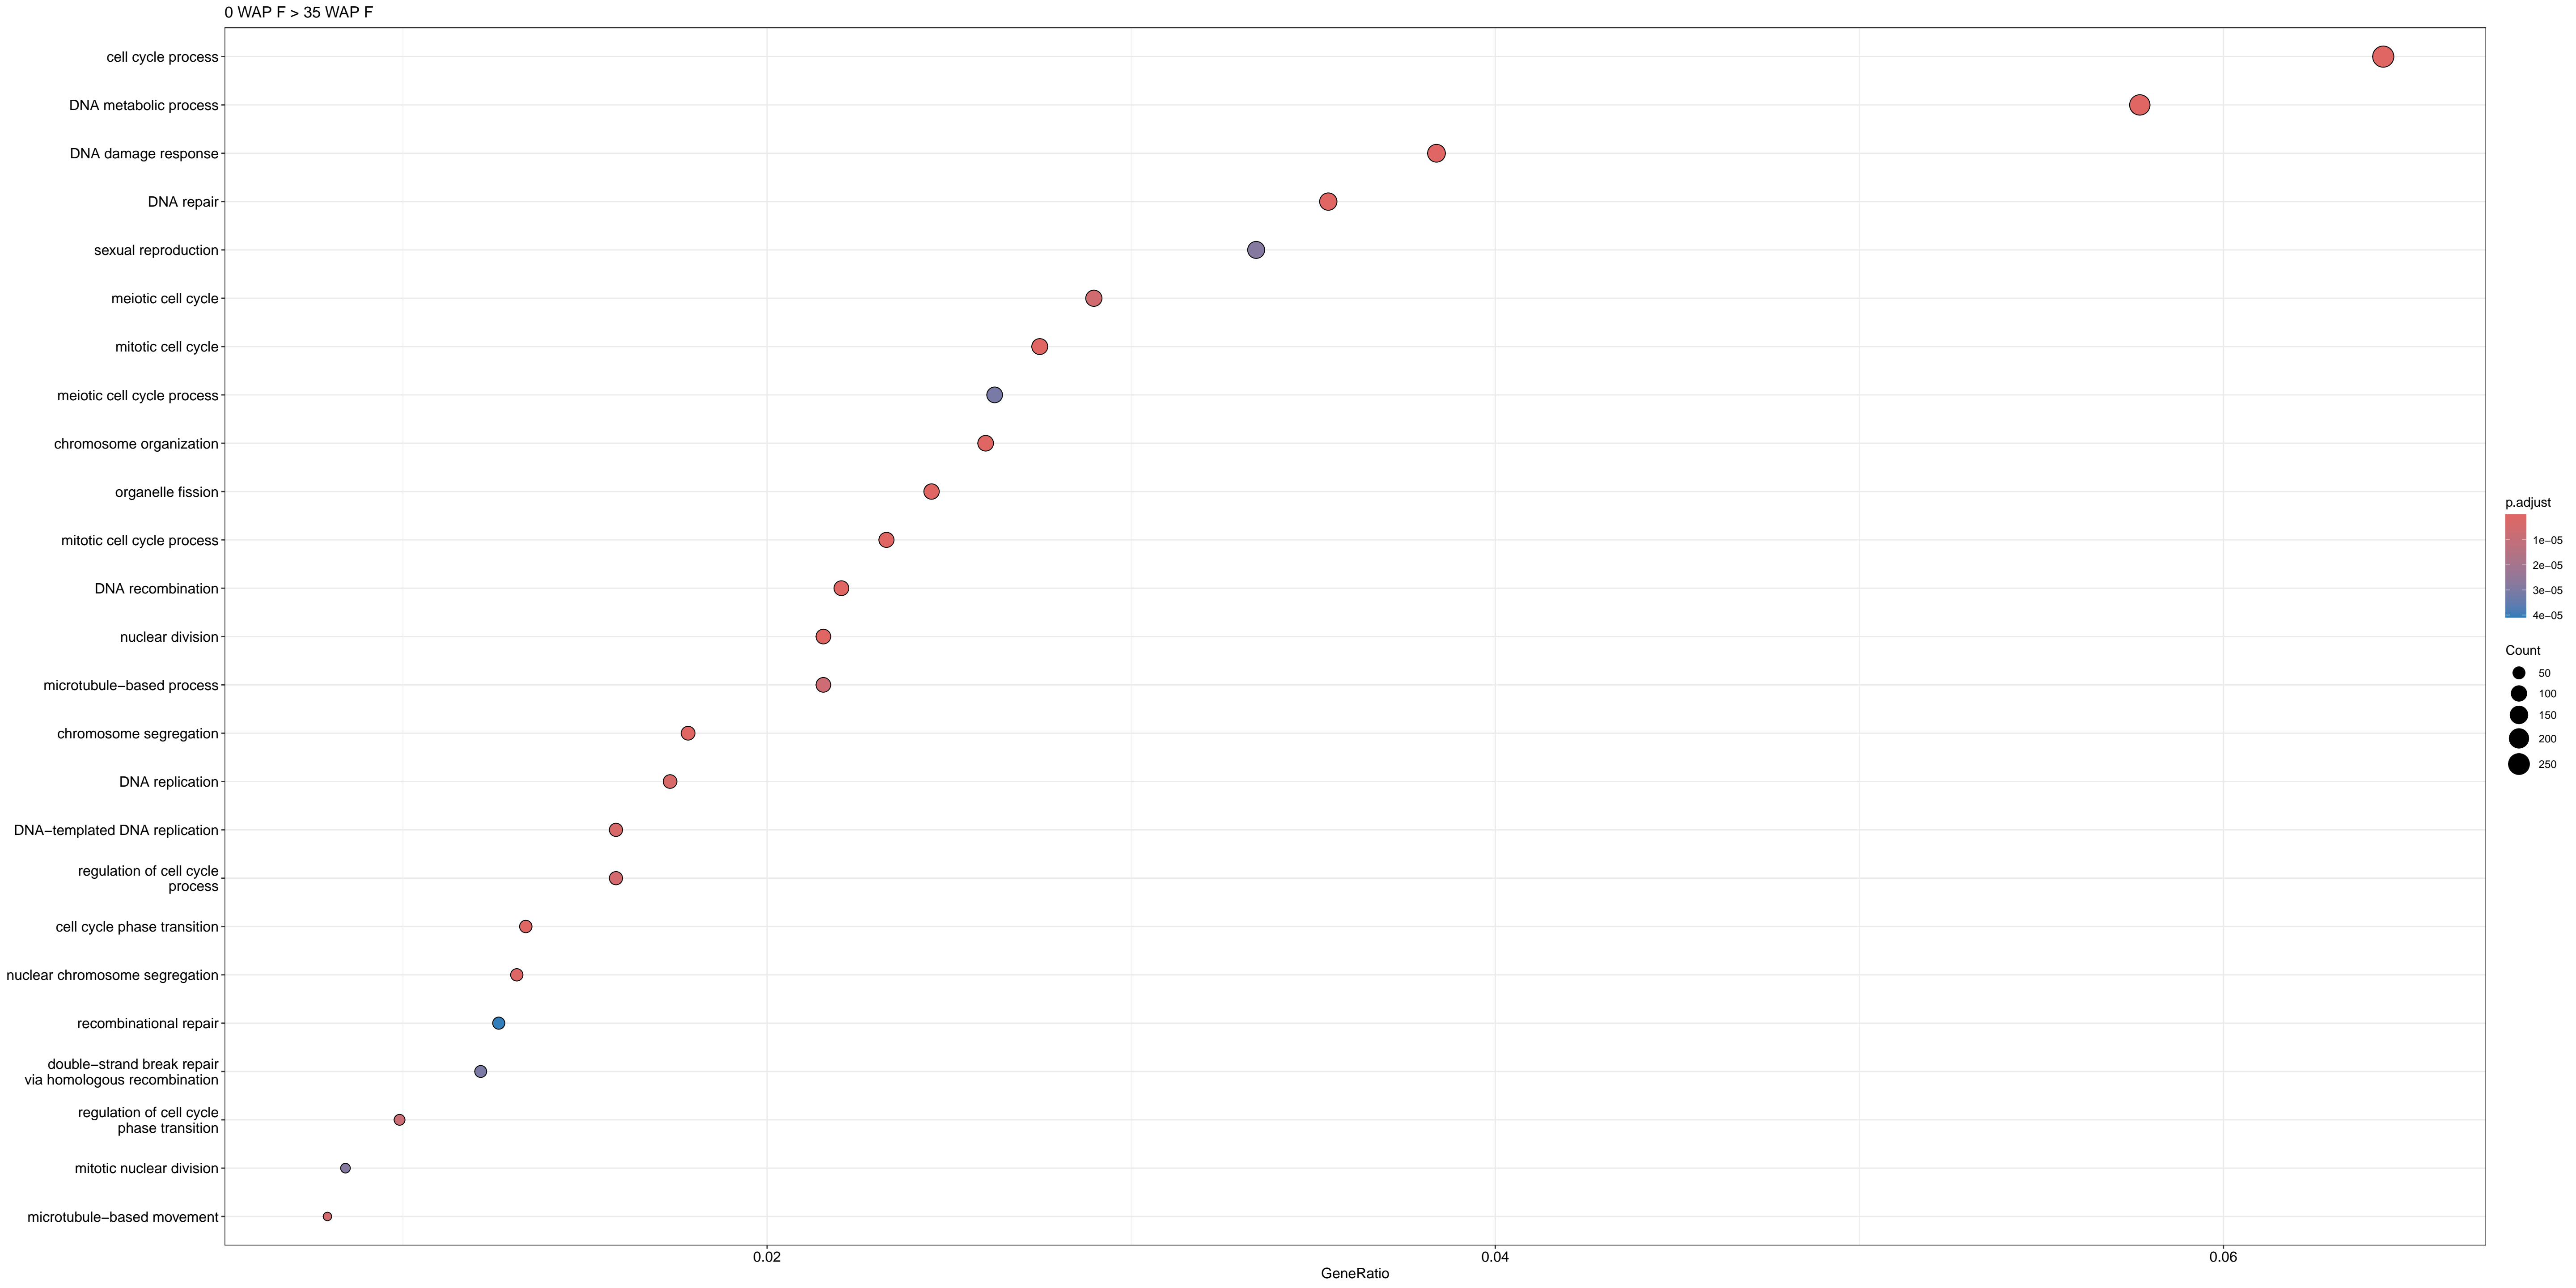

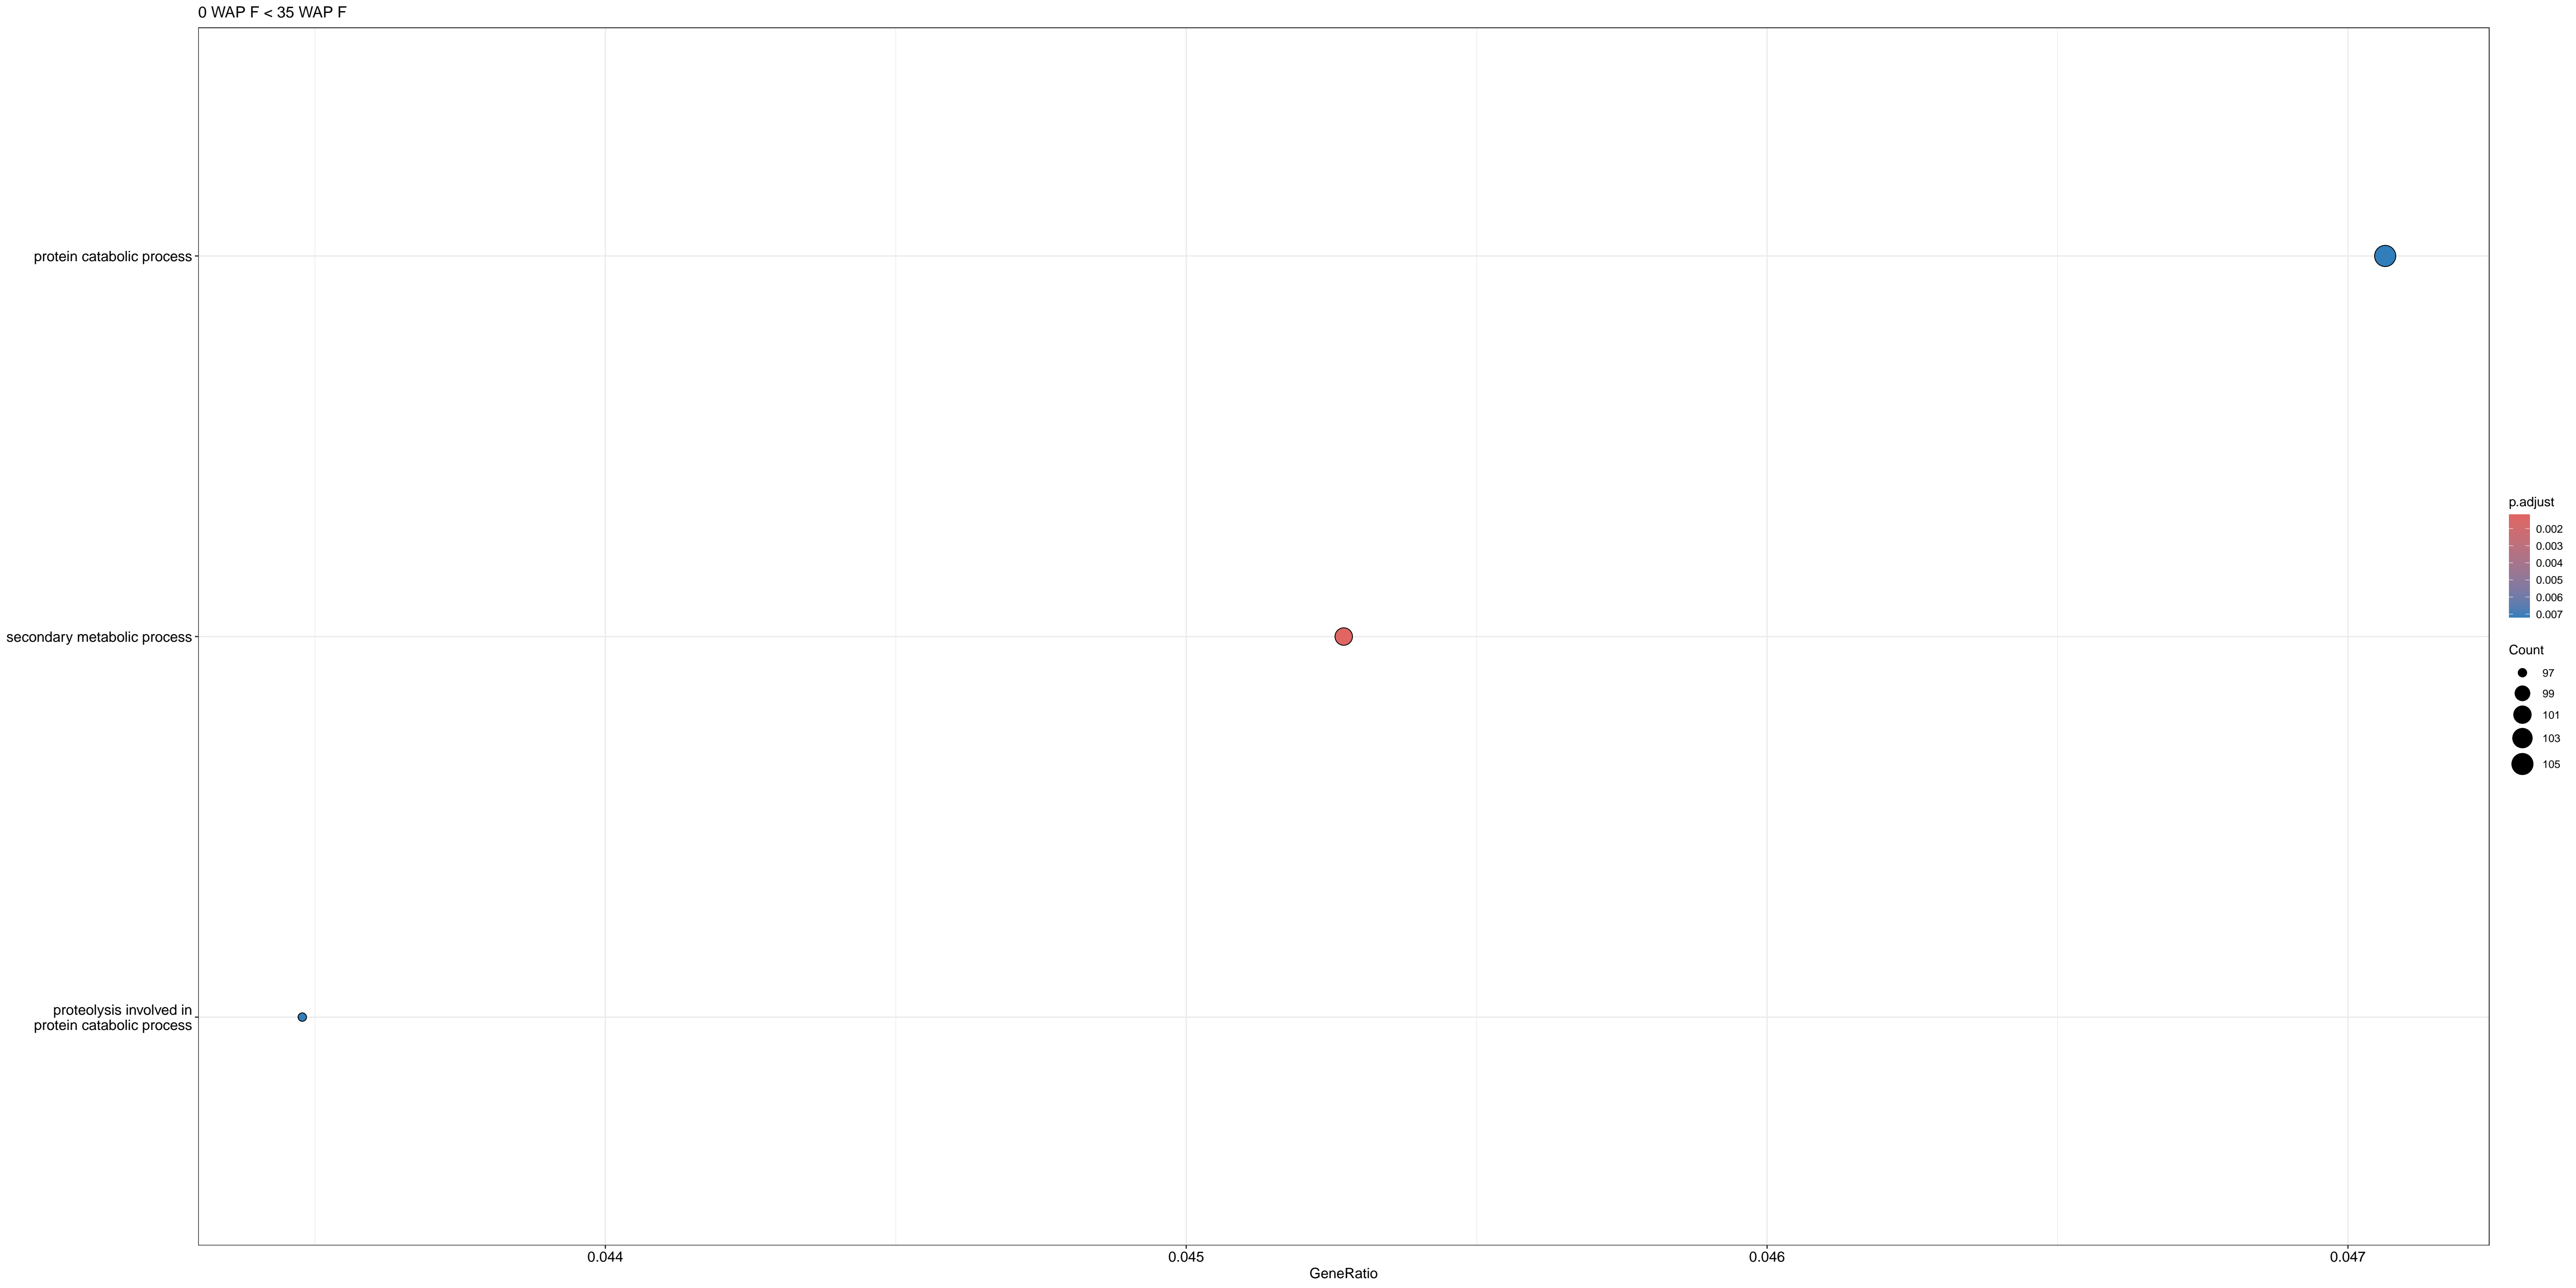

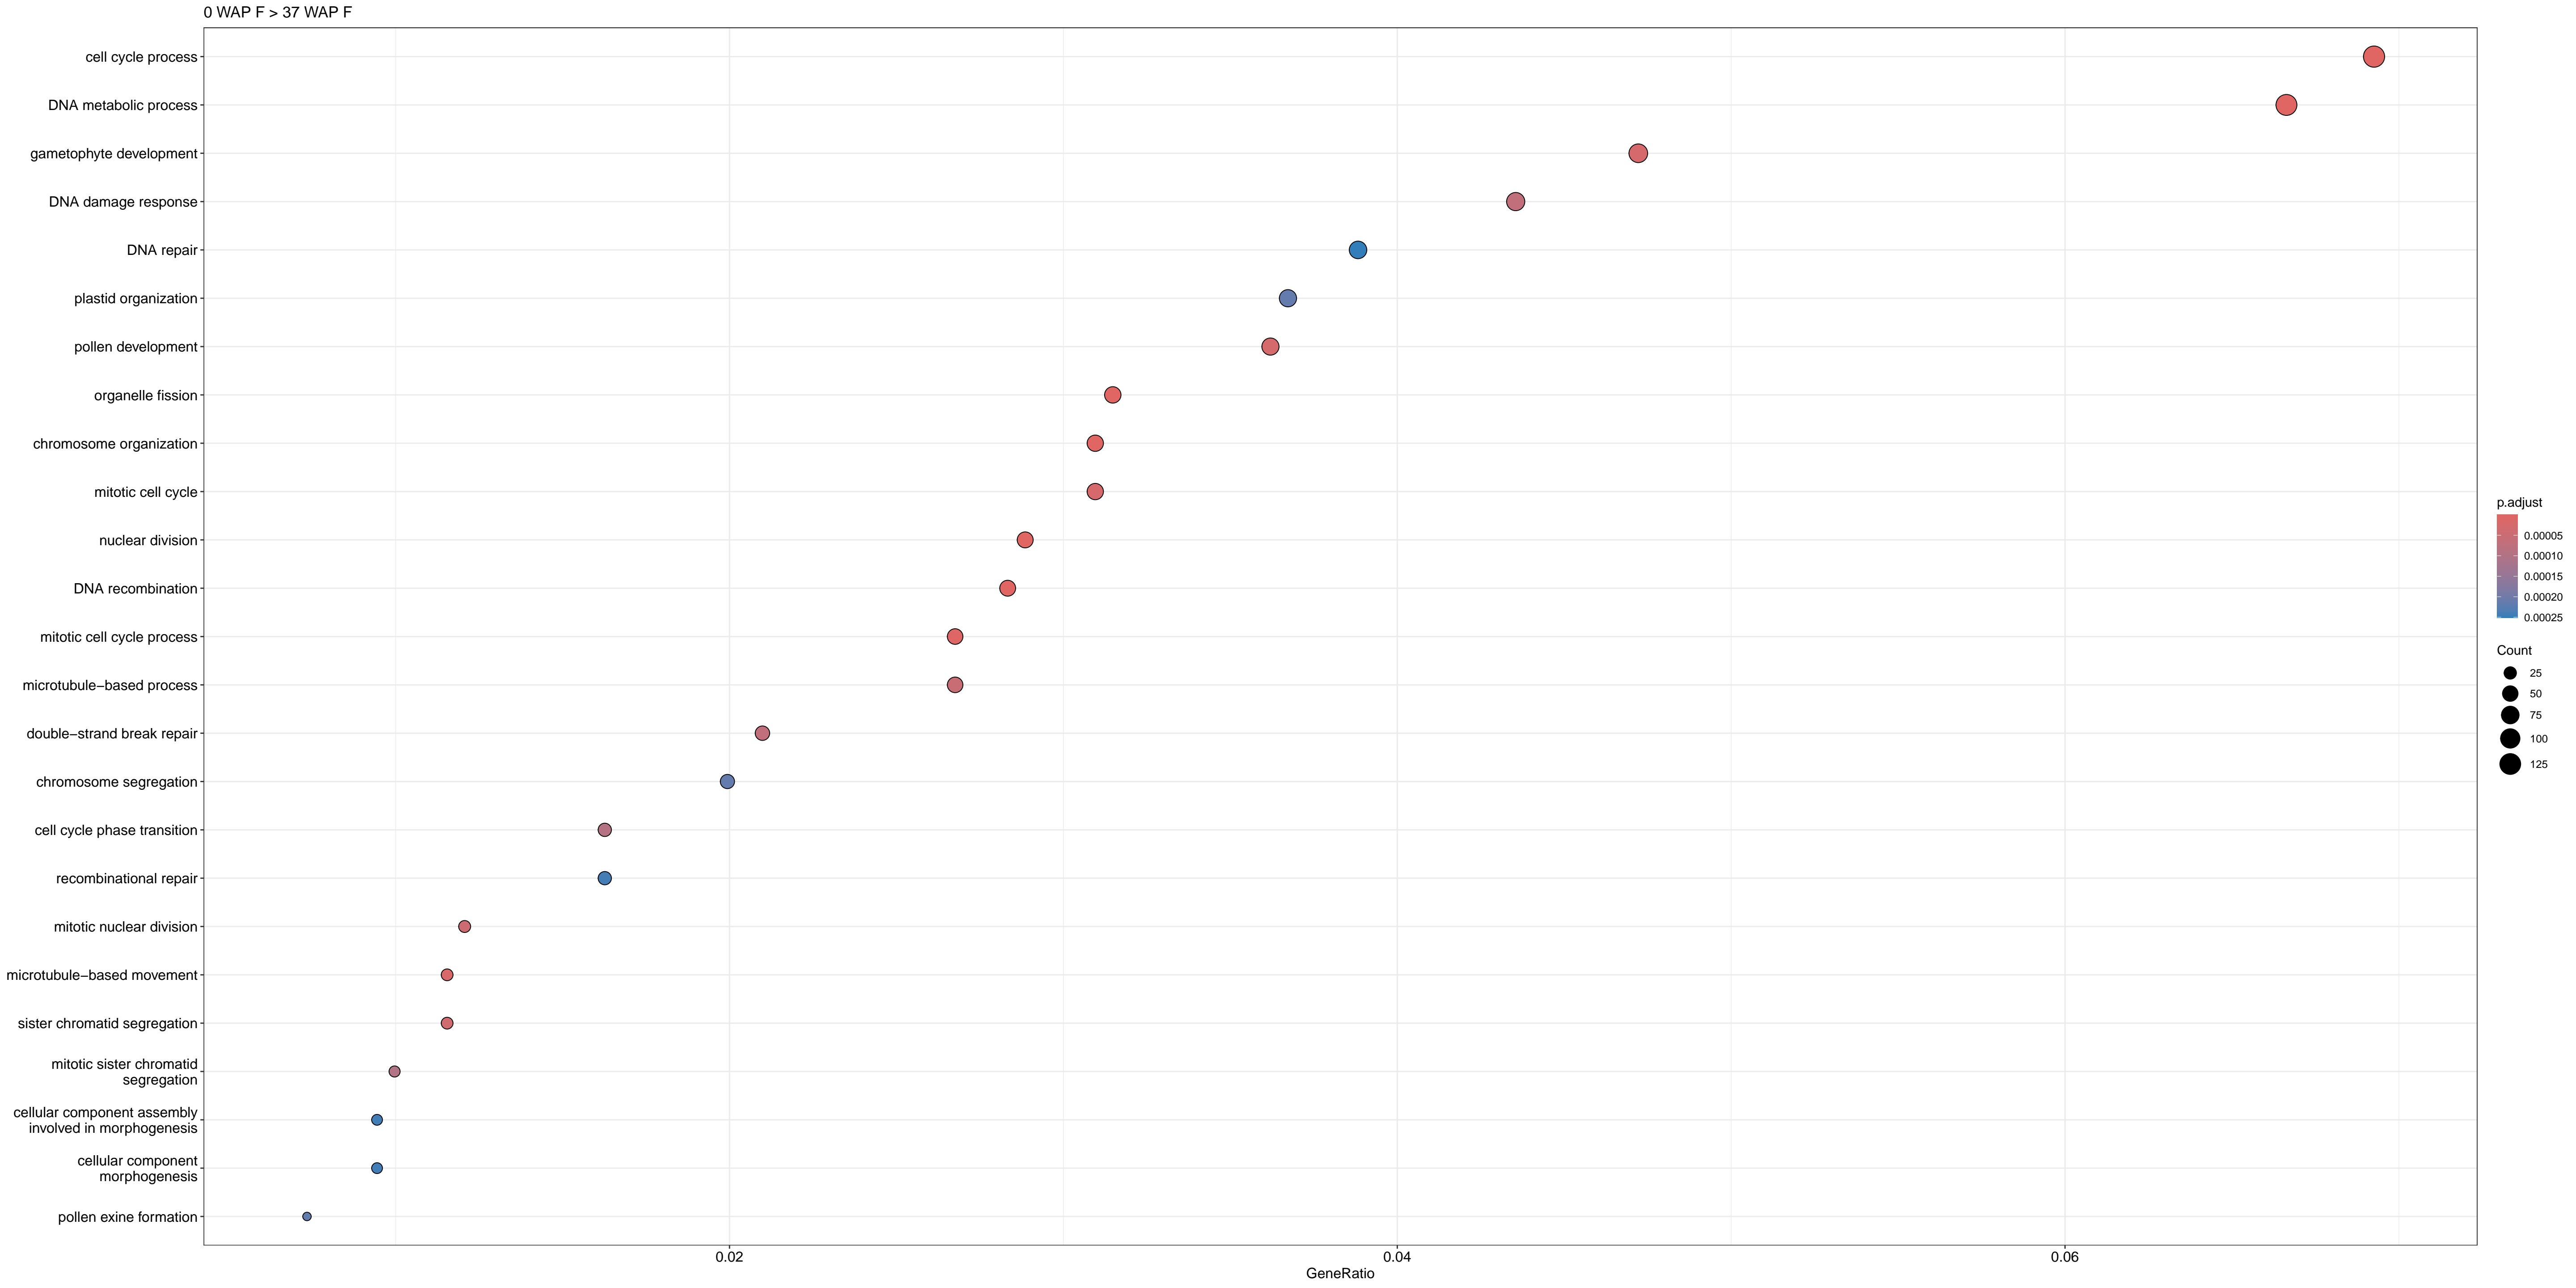

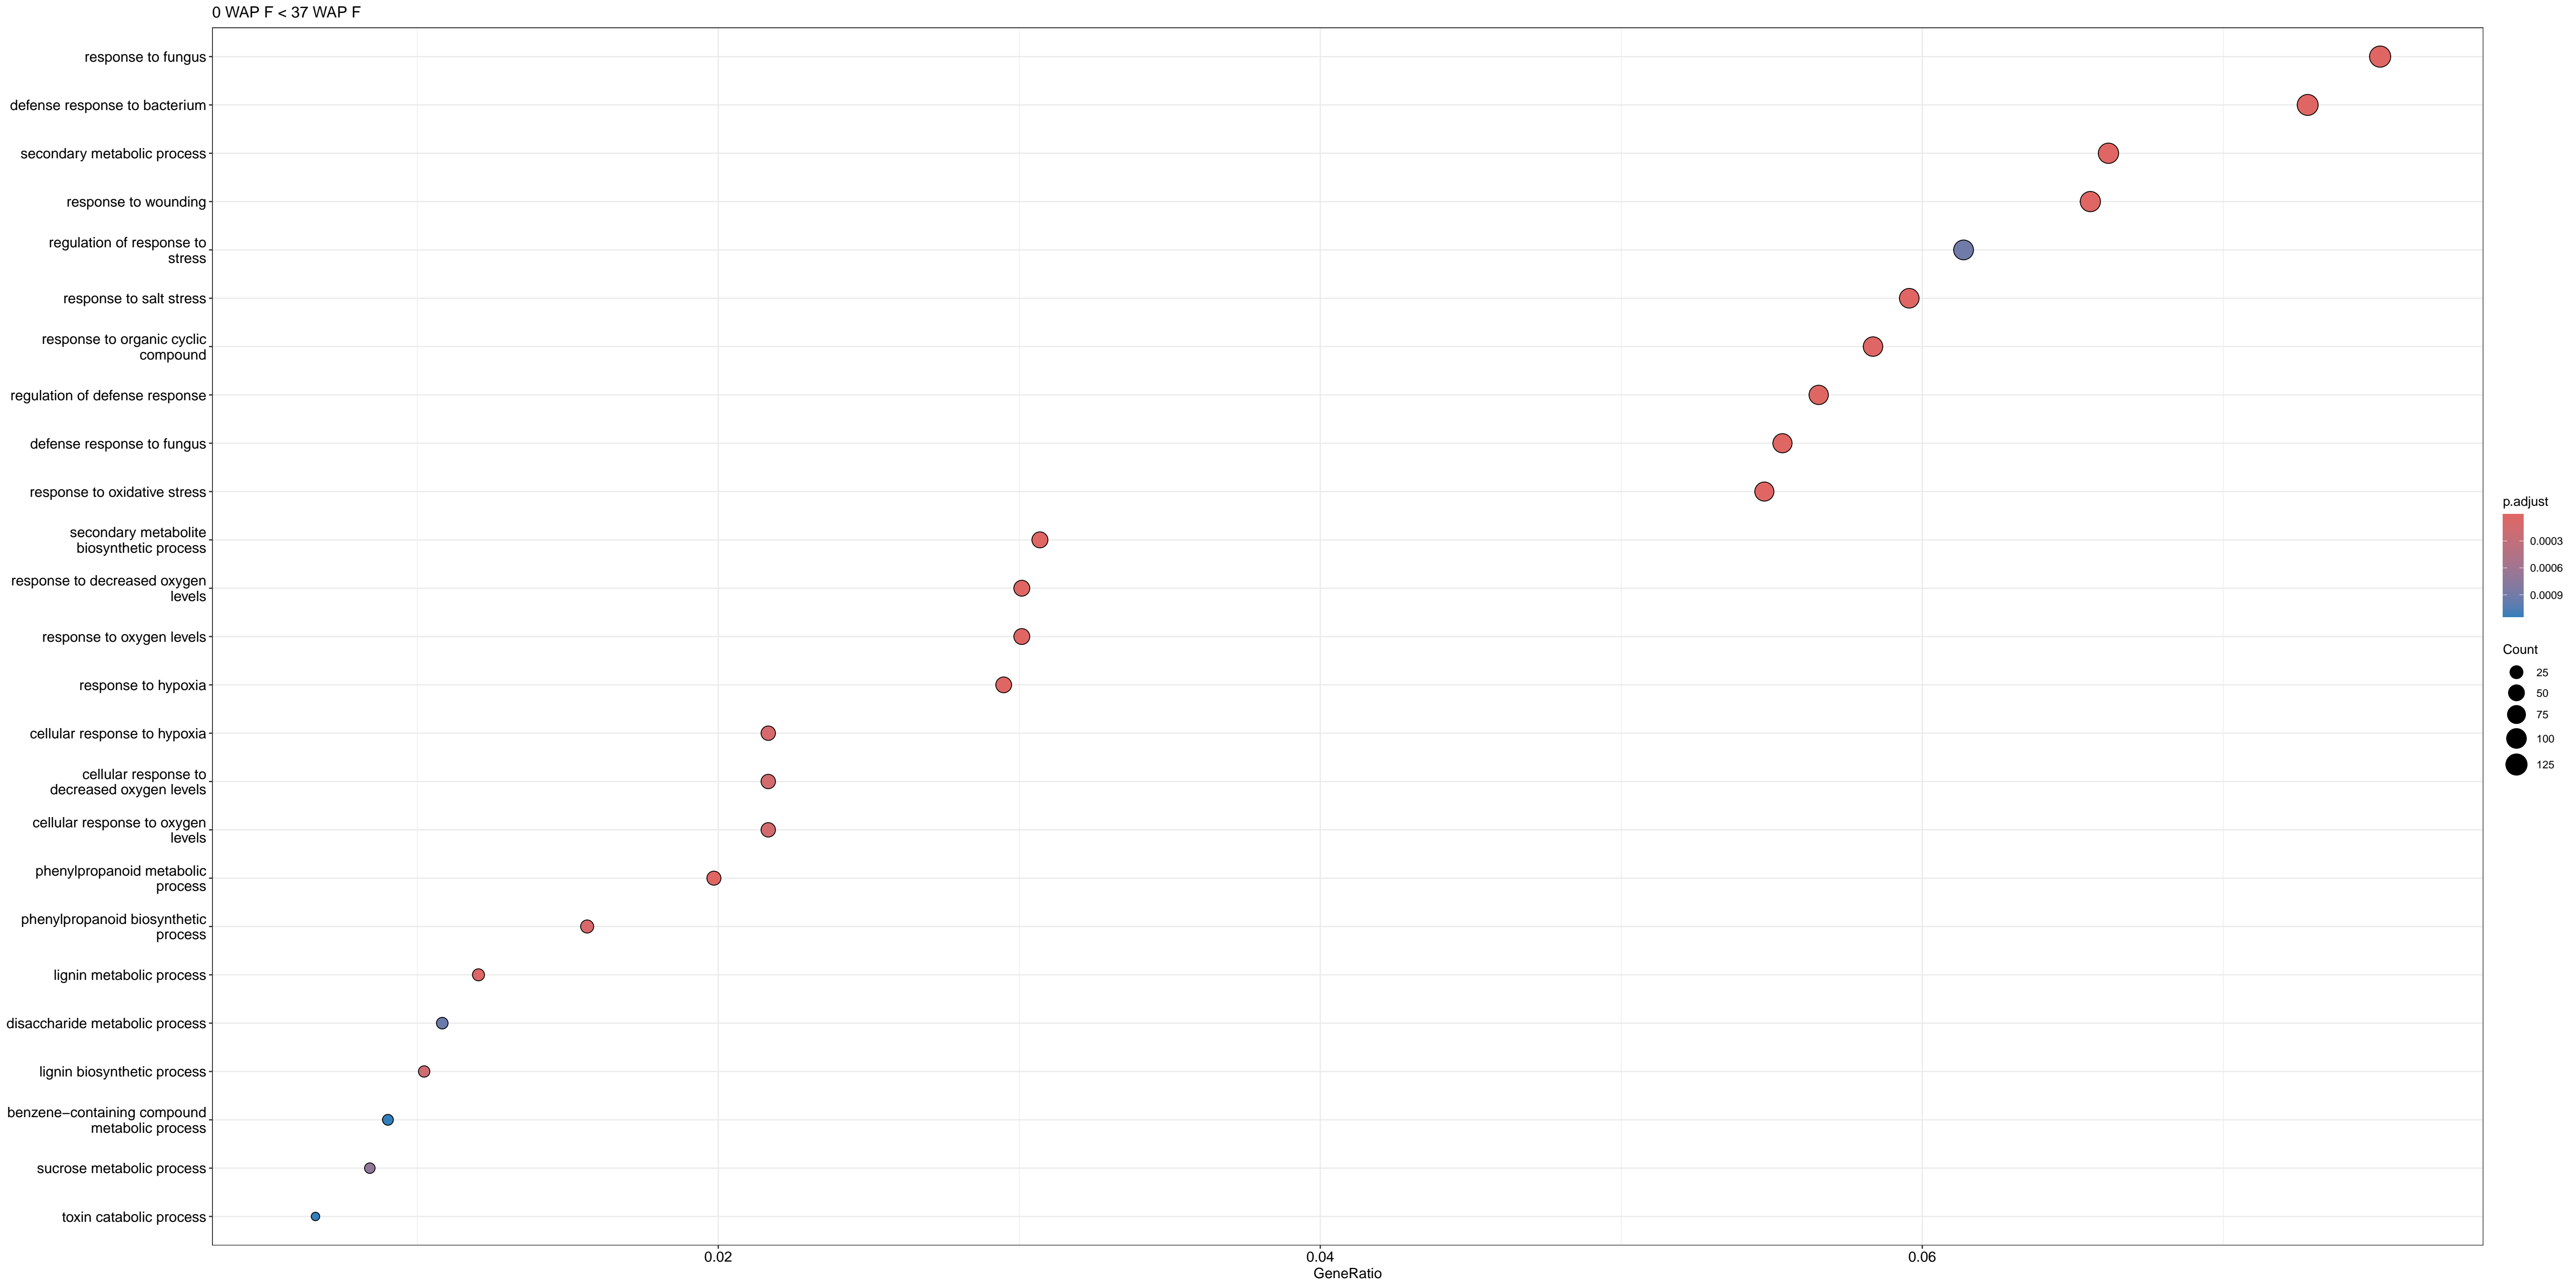

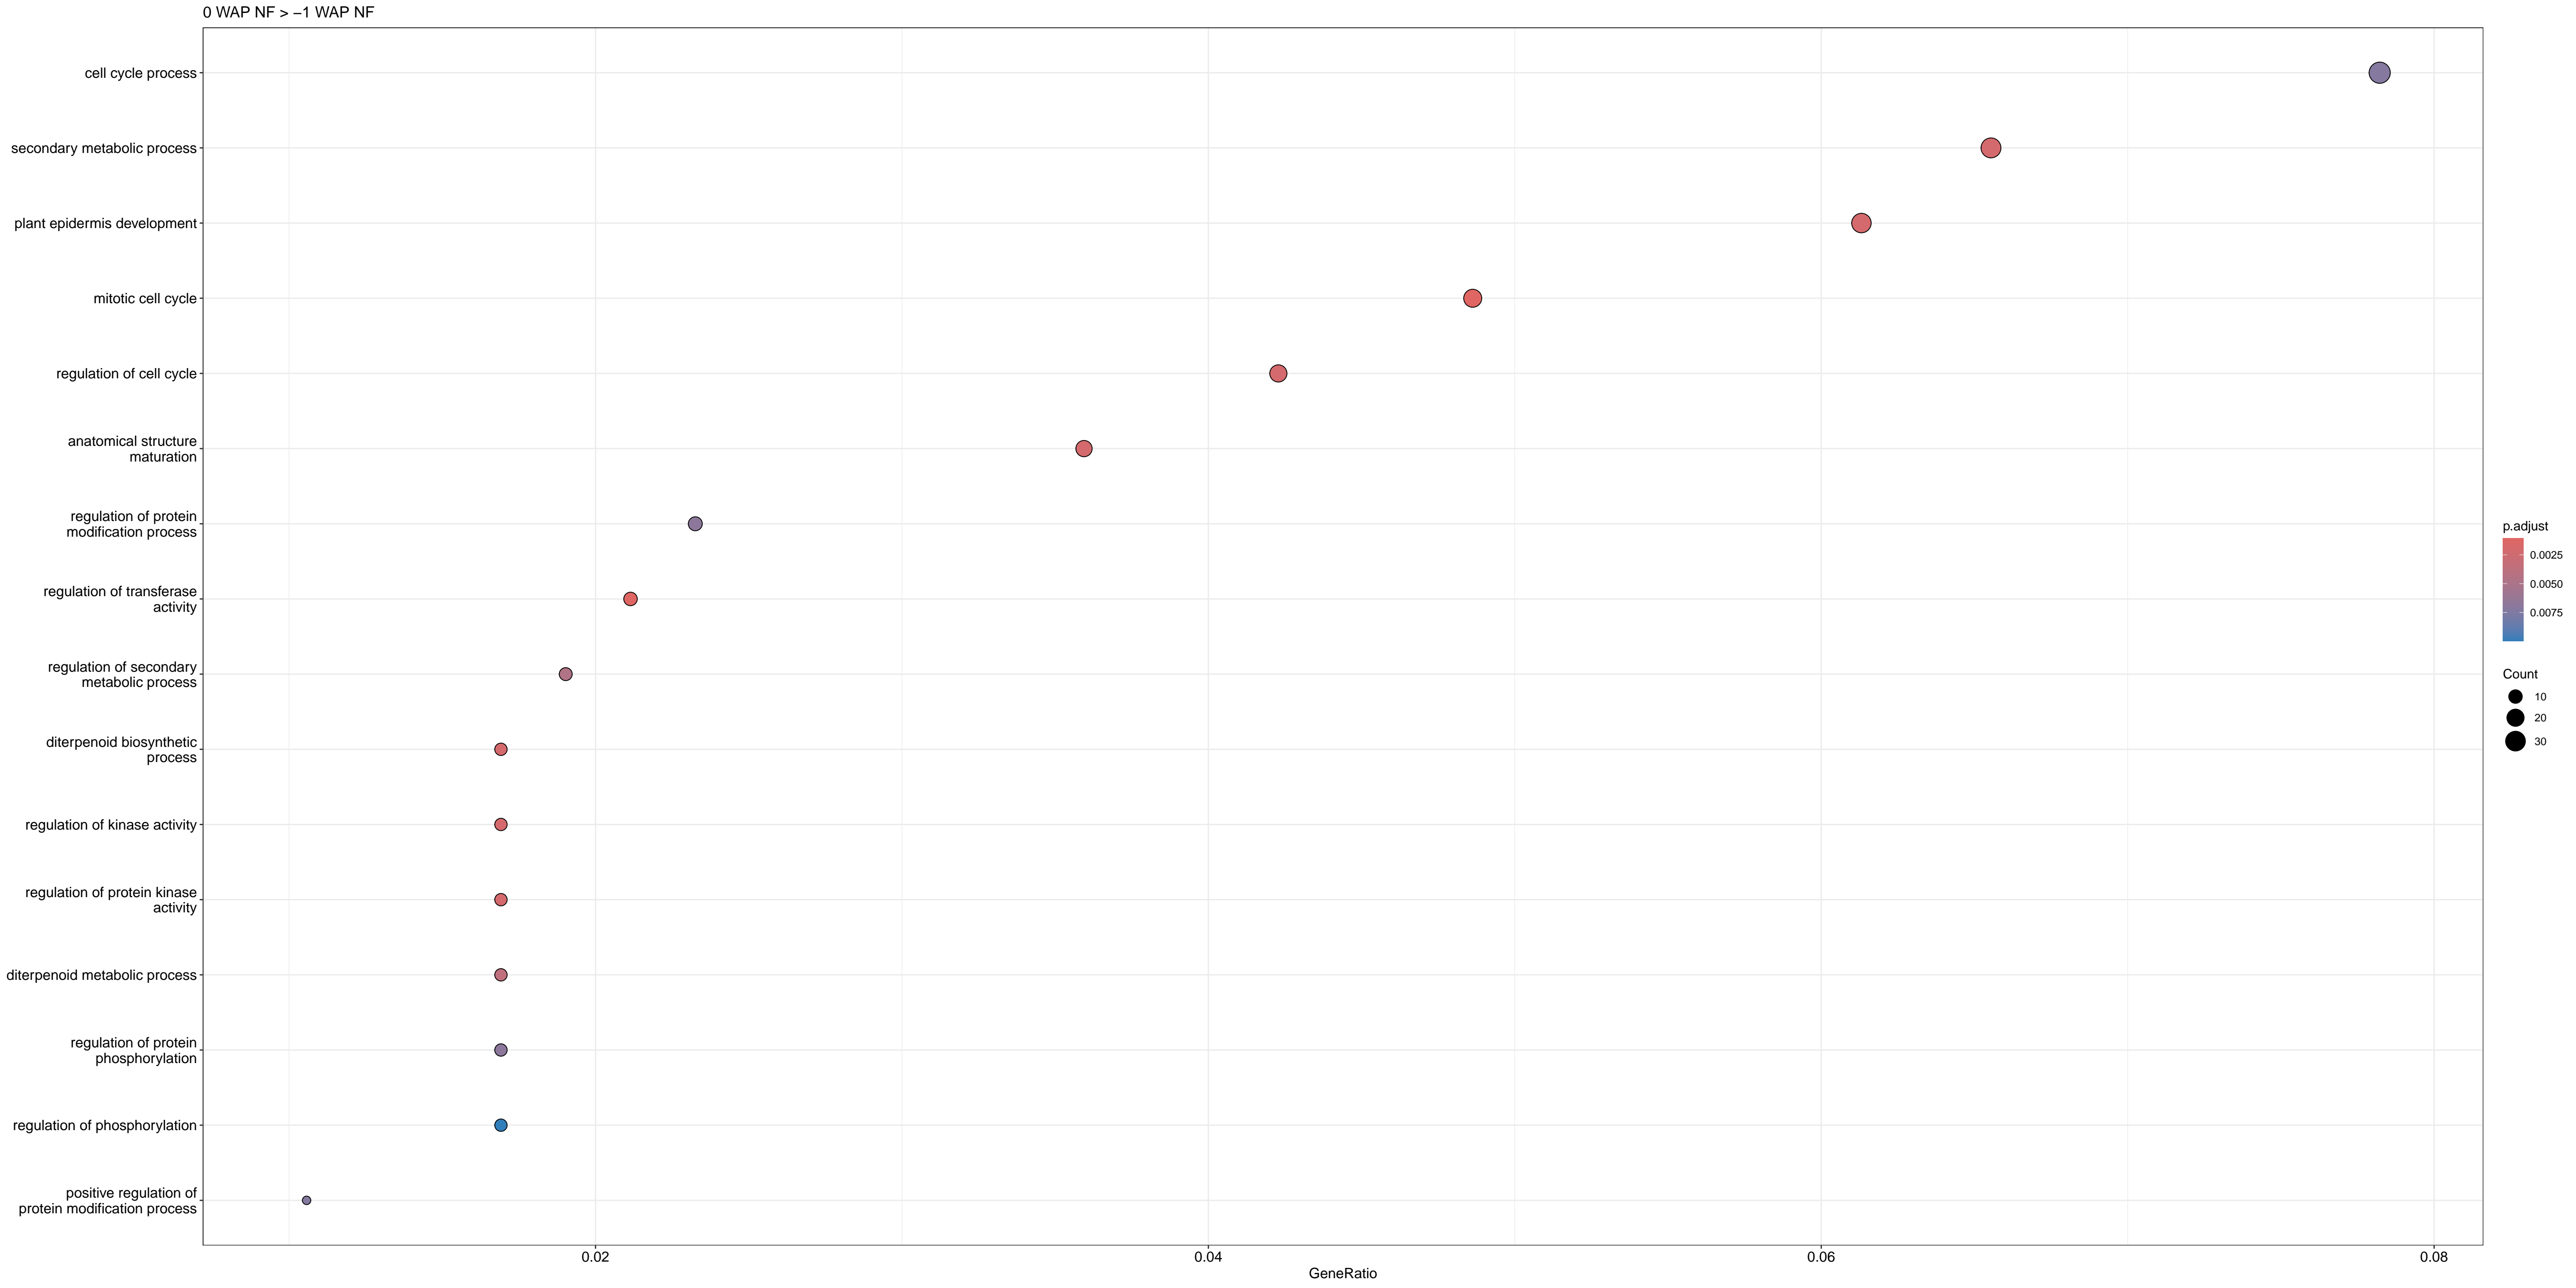



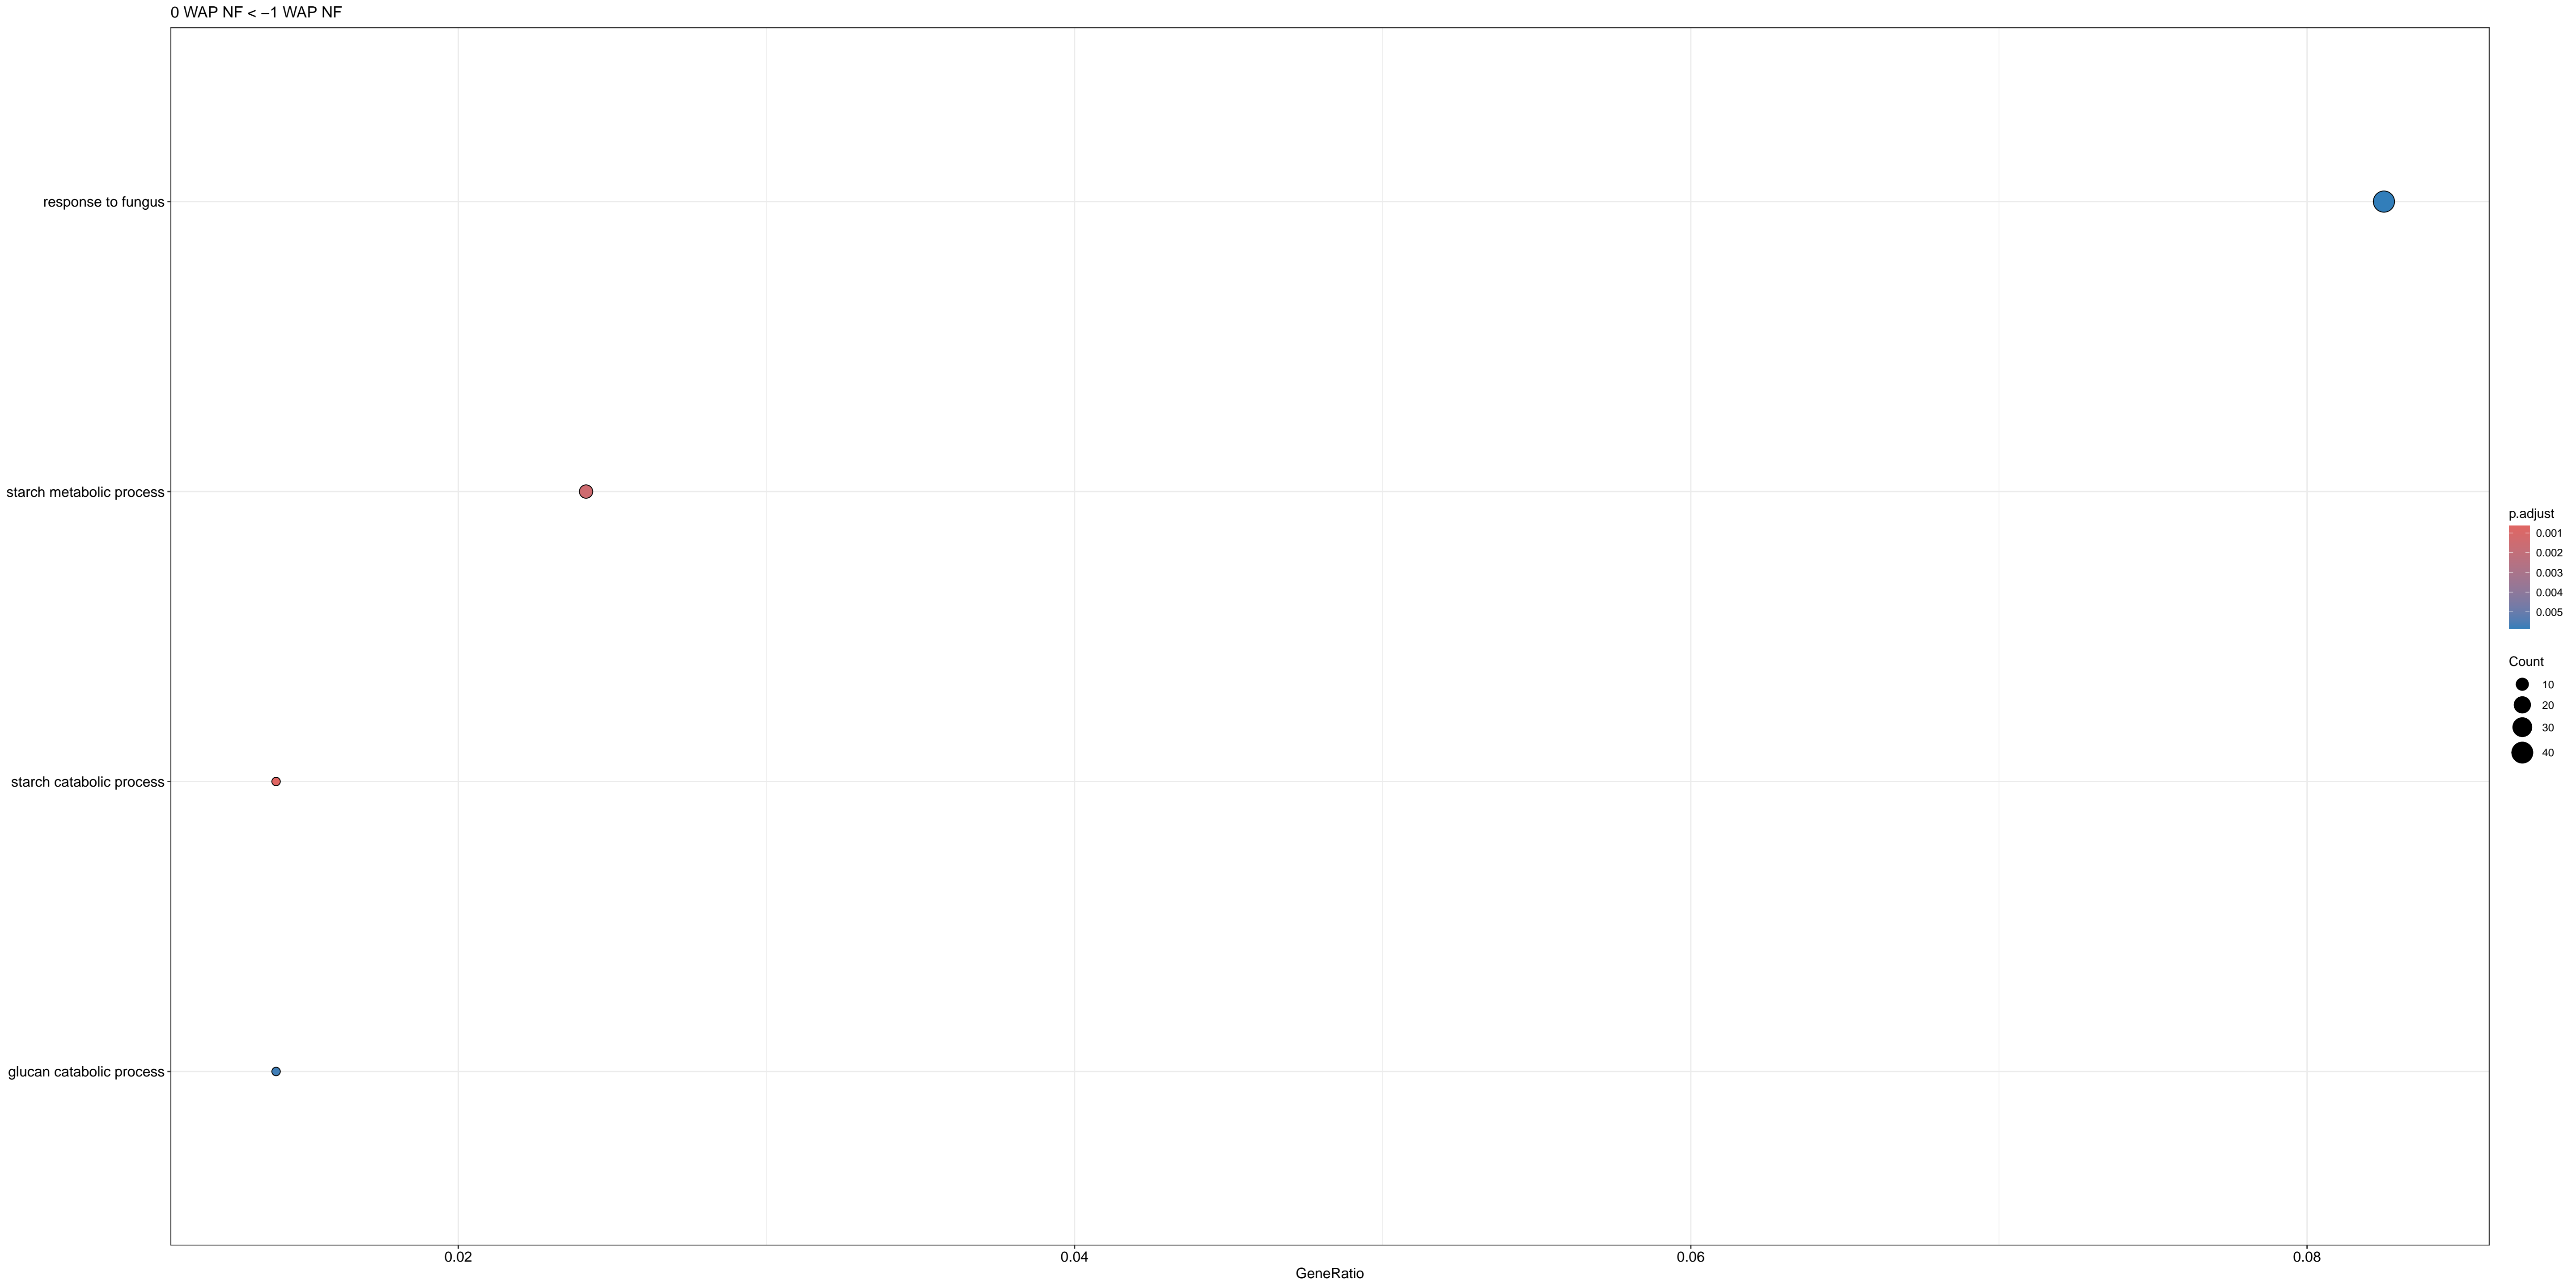

0 WAP NF > 10 WAP NF

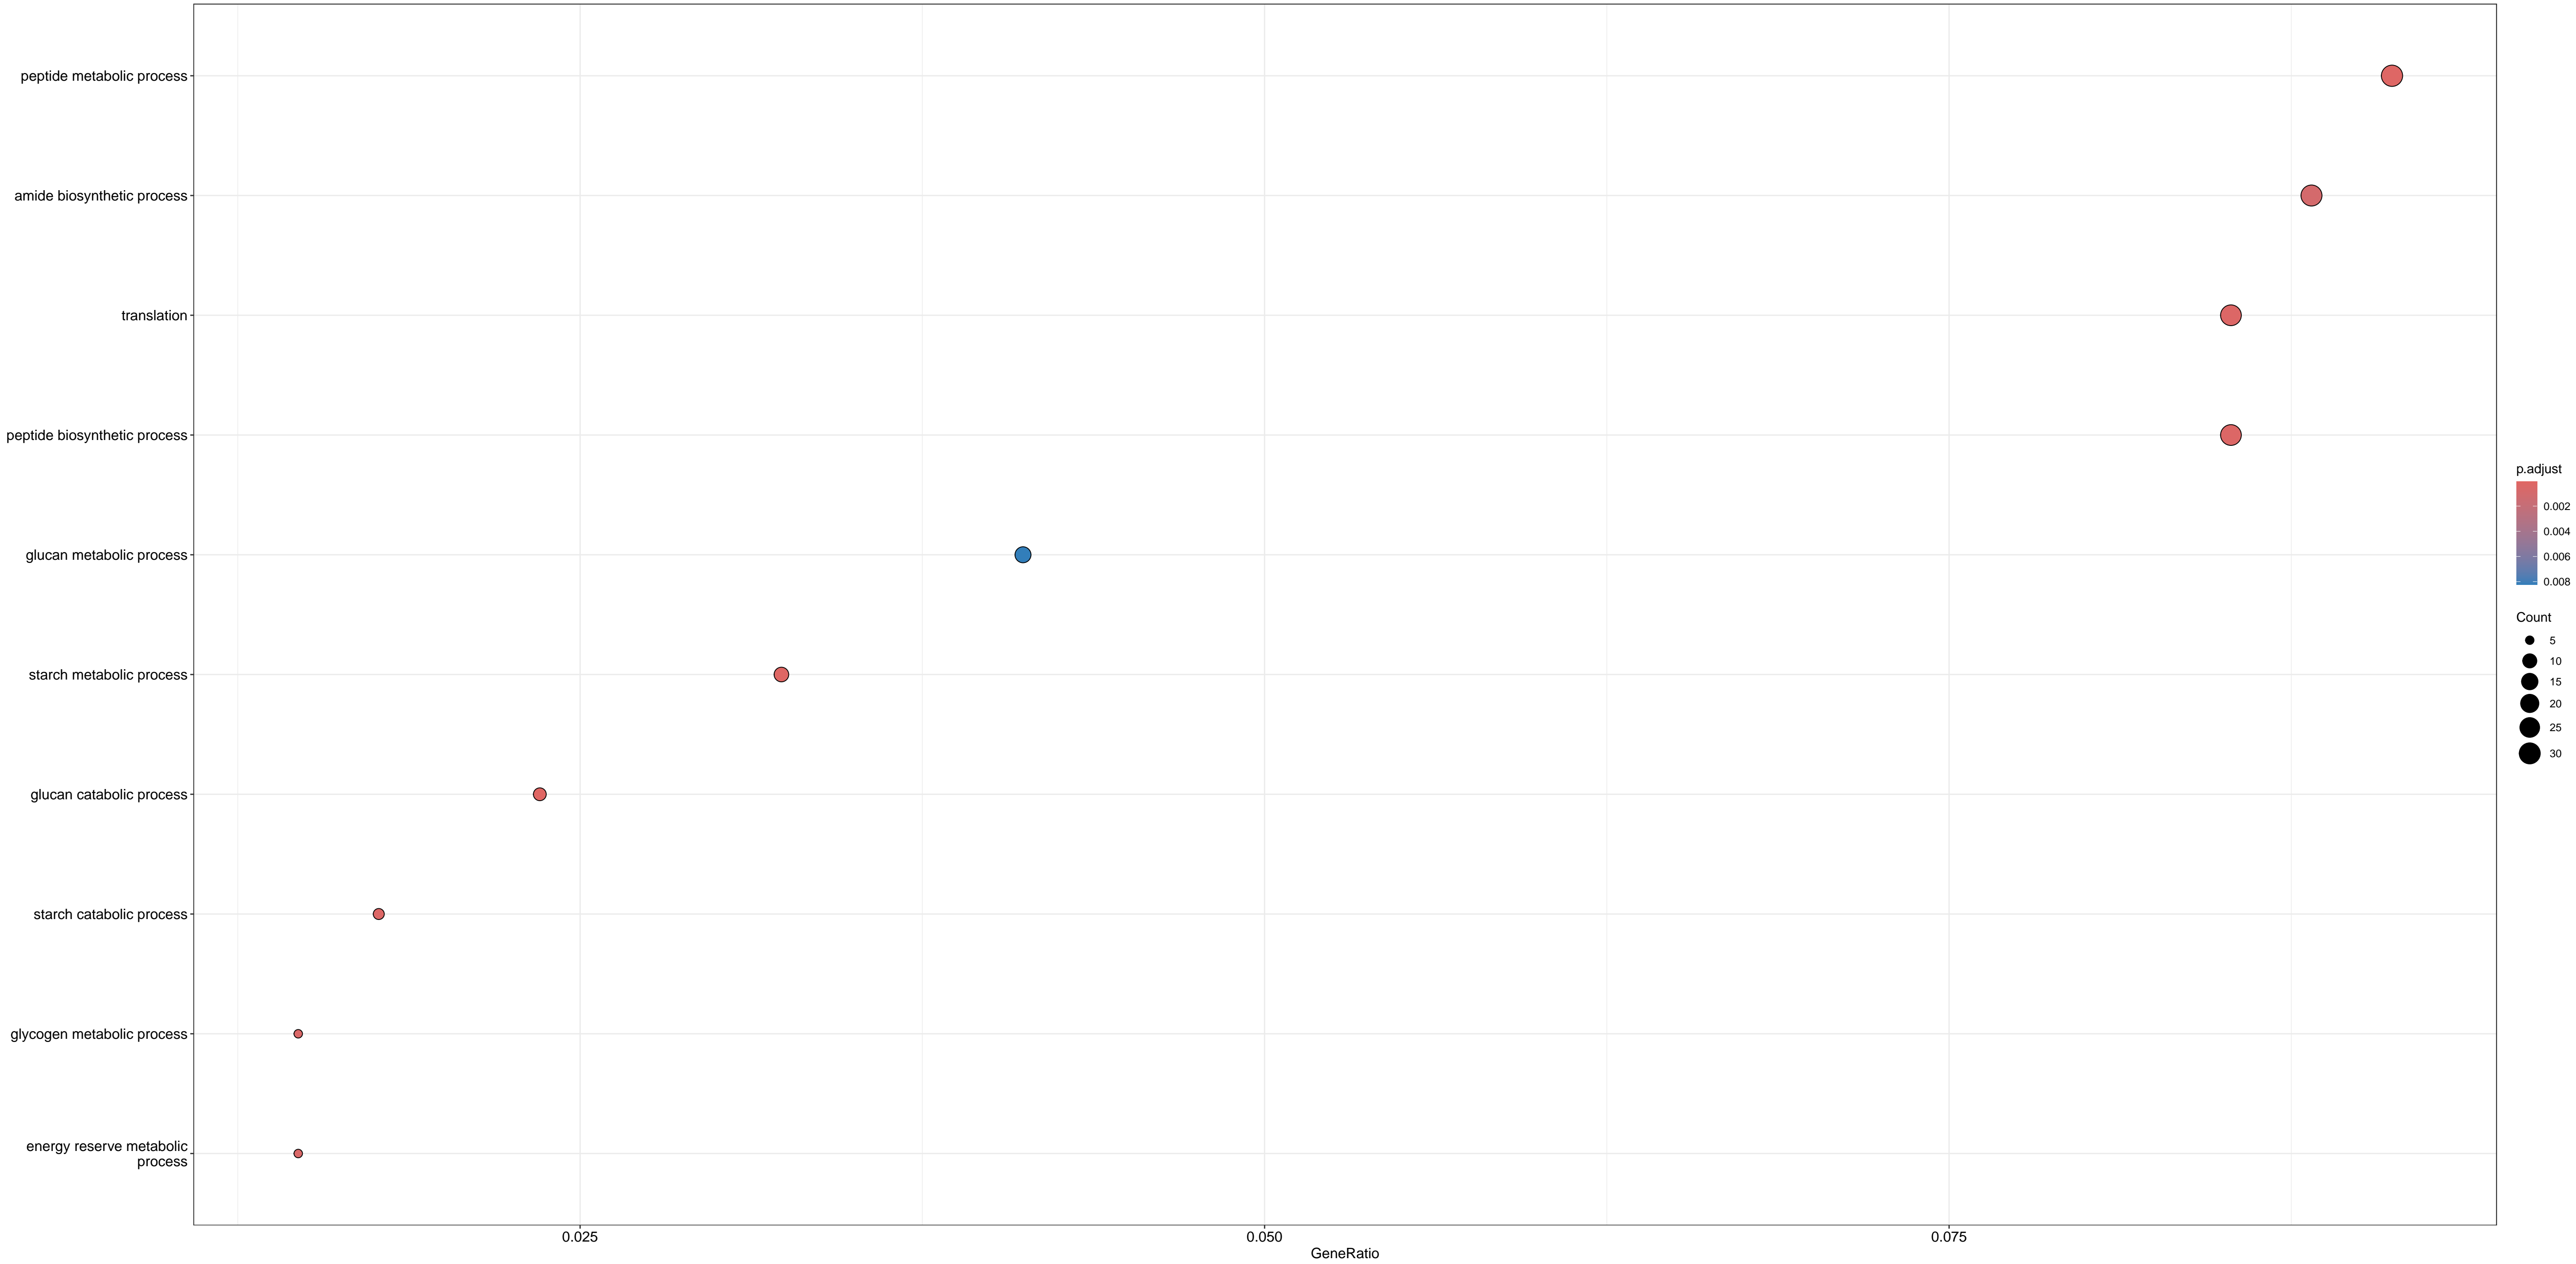

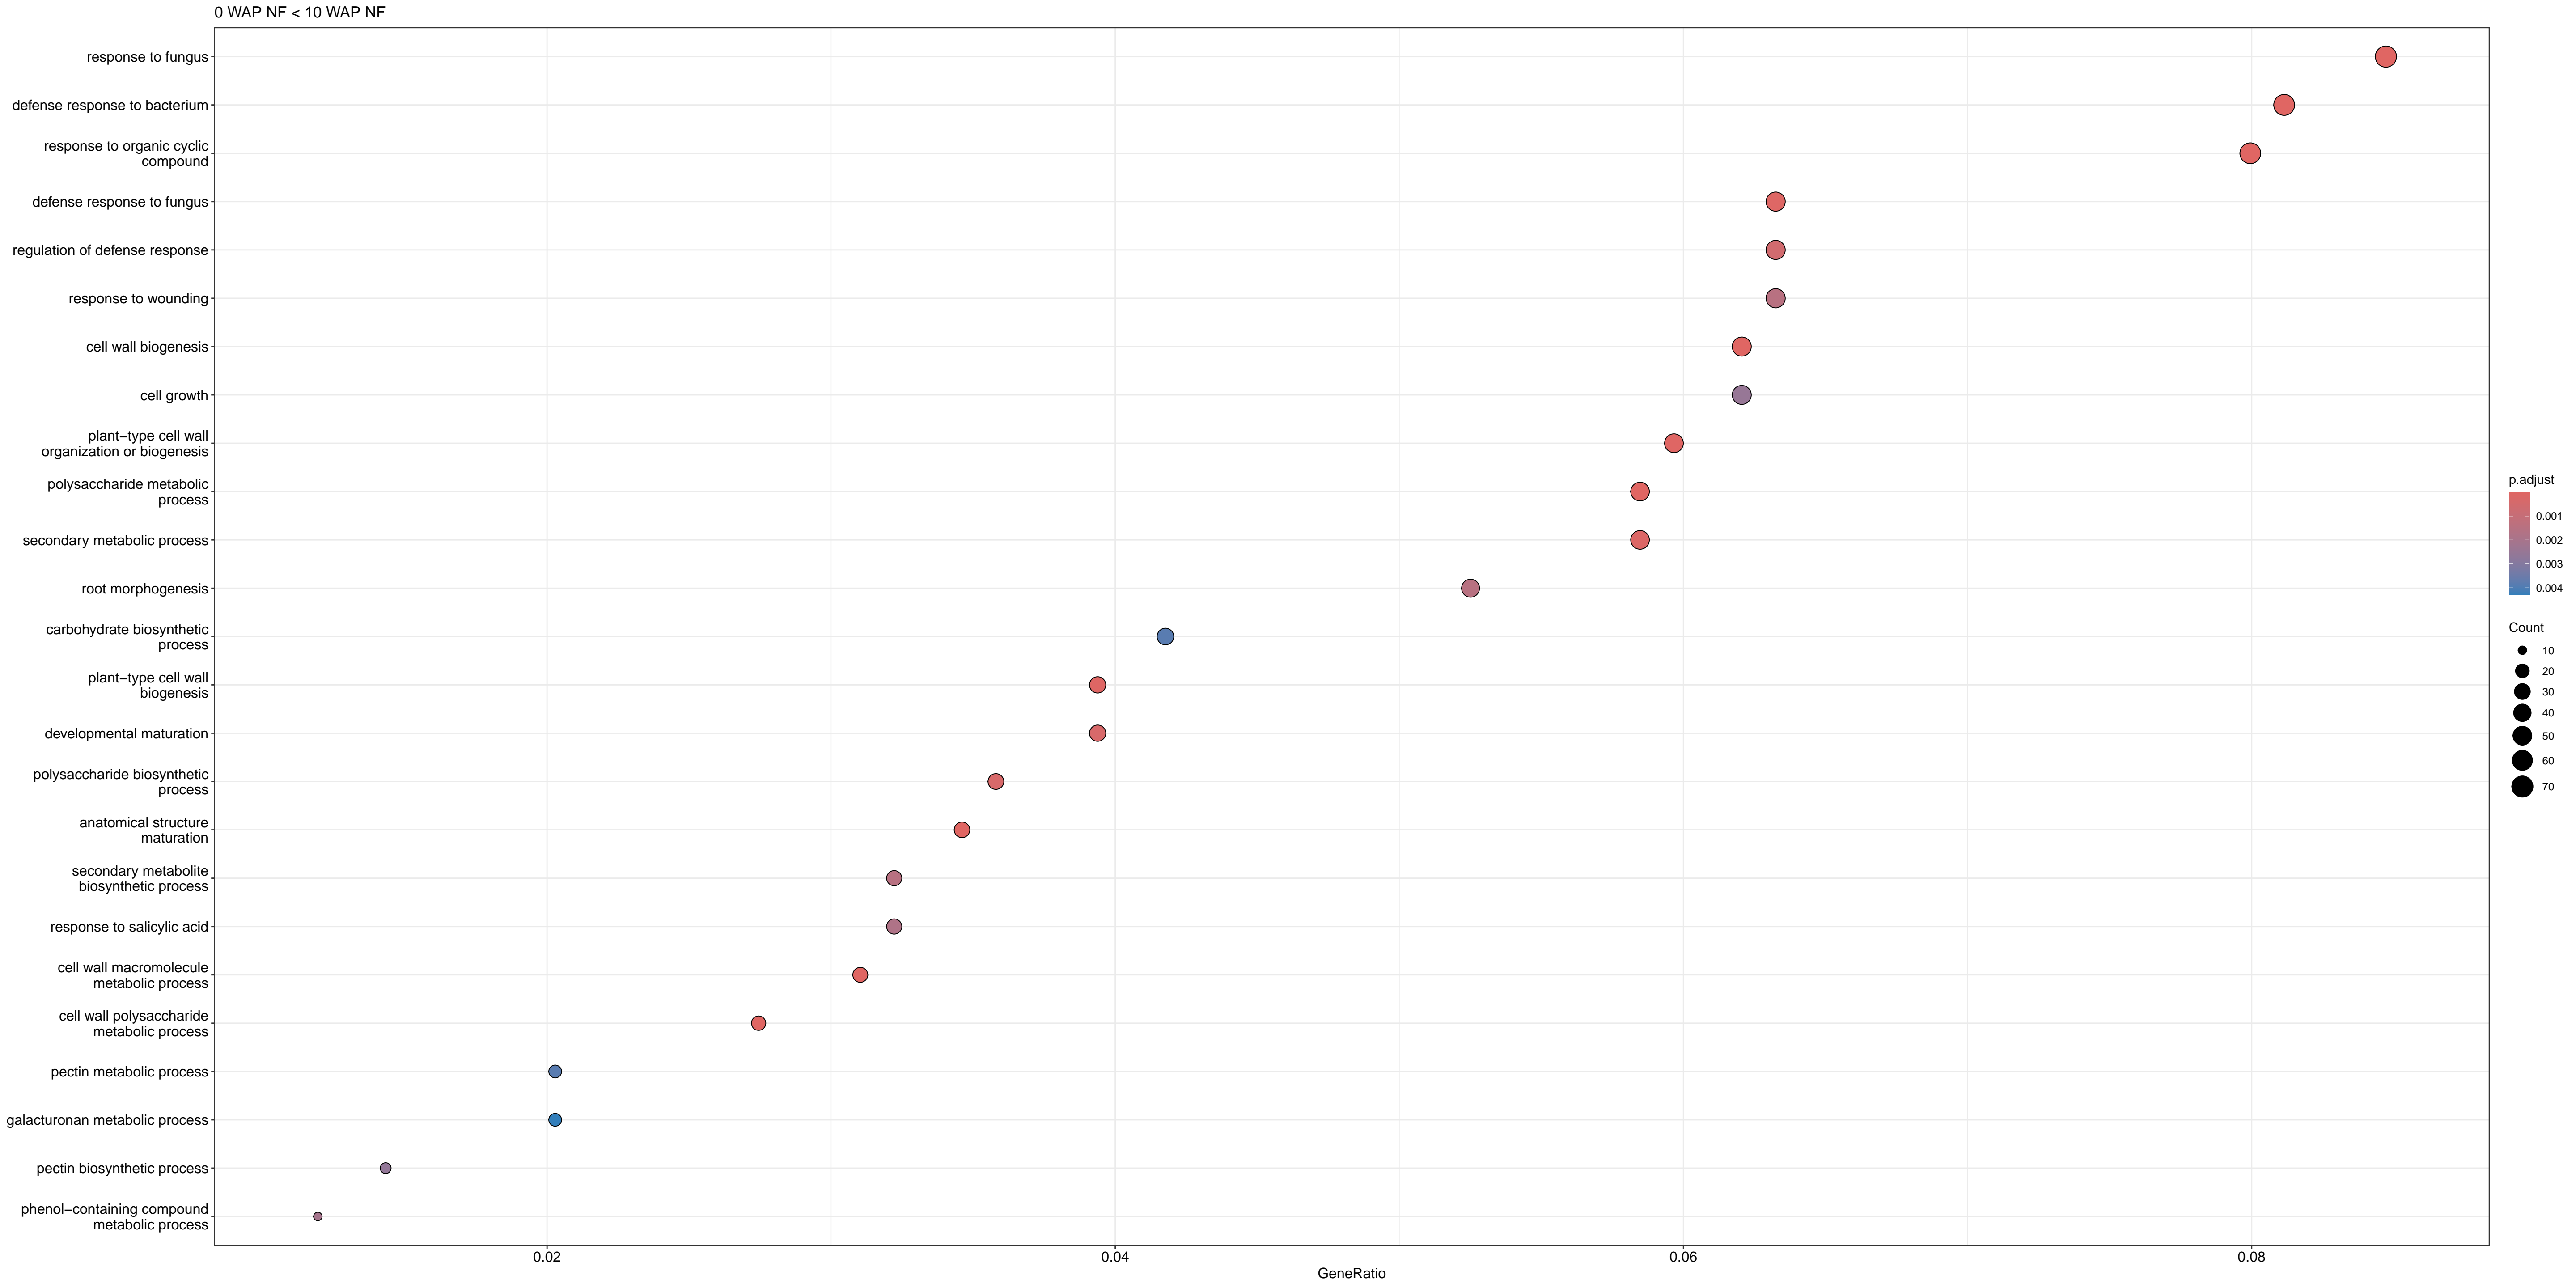

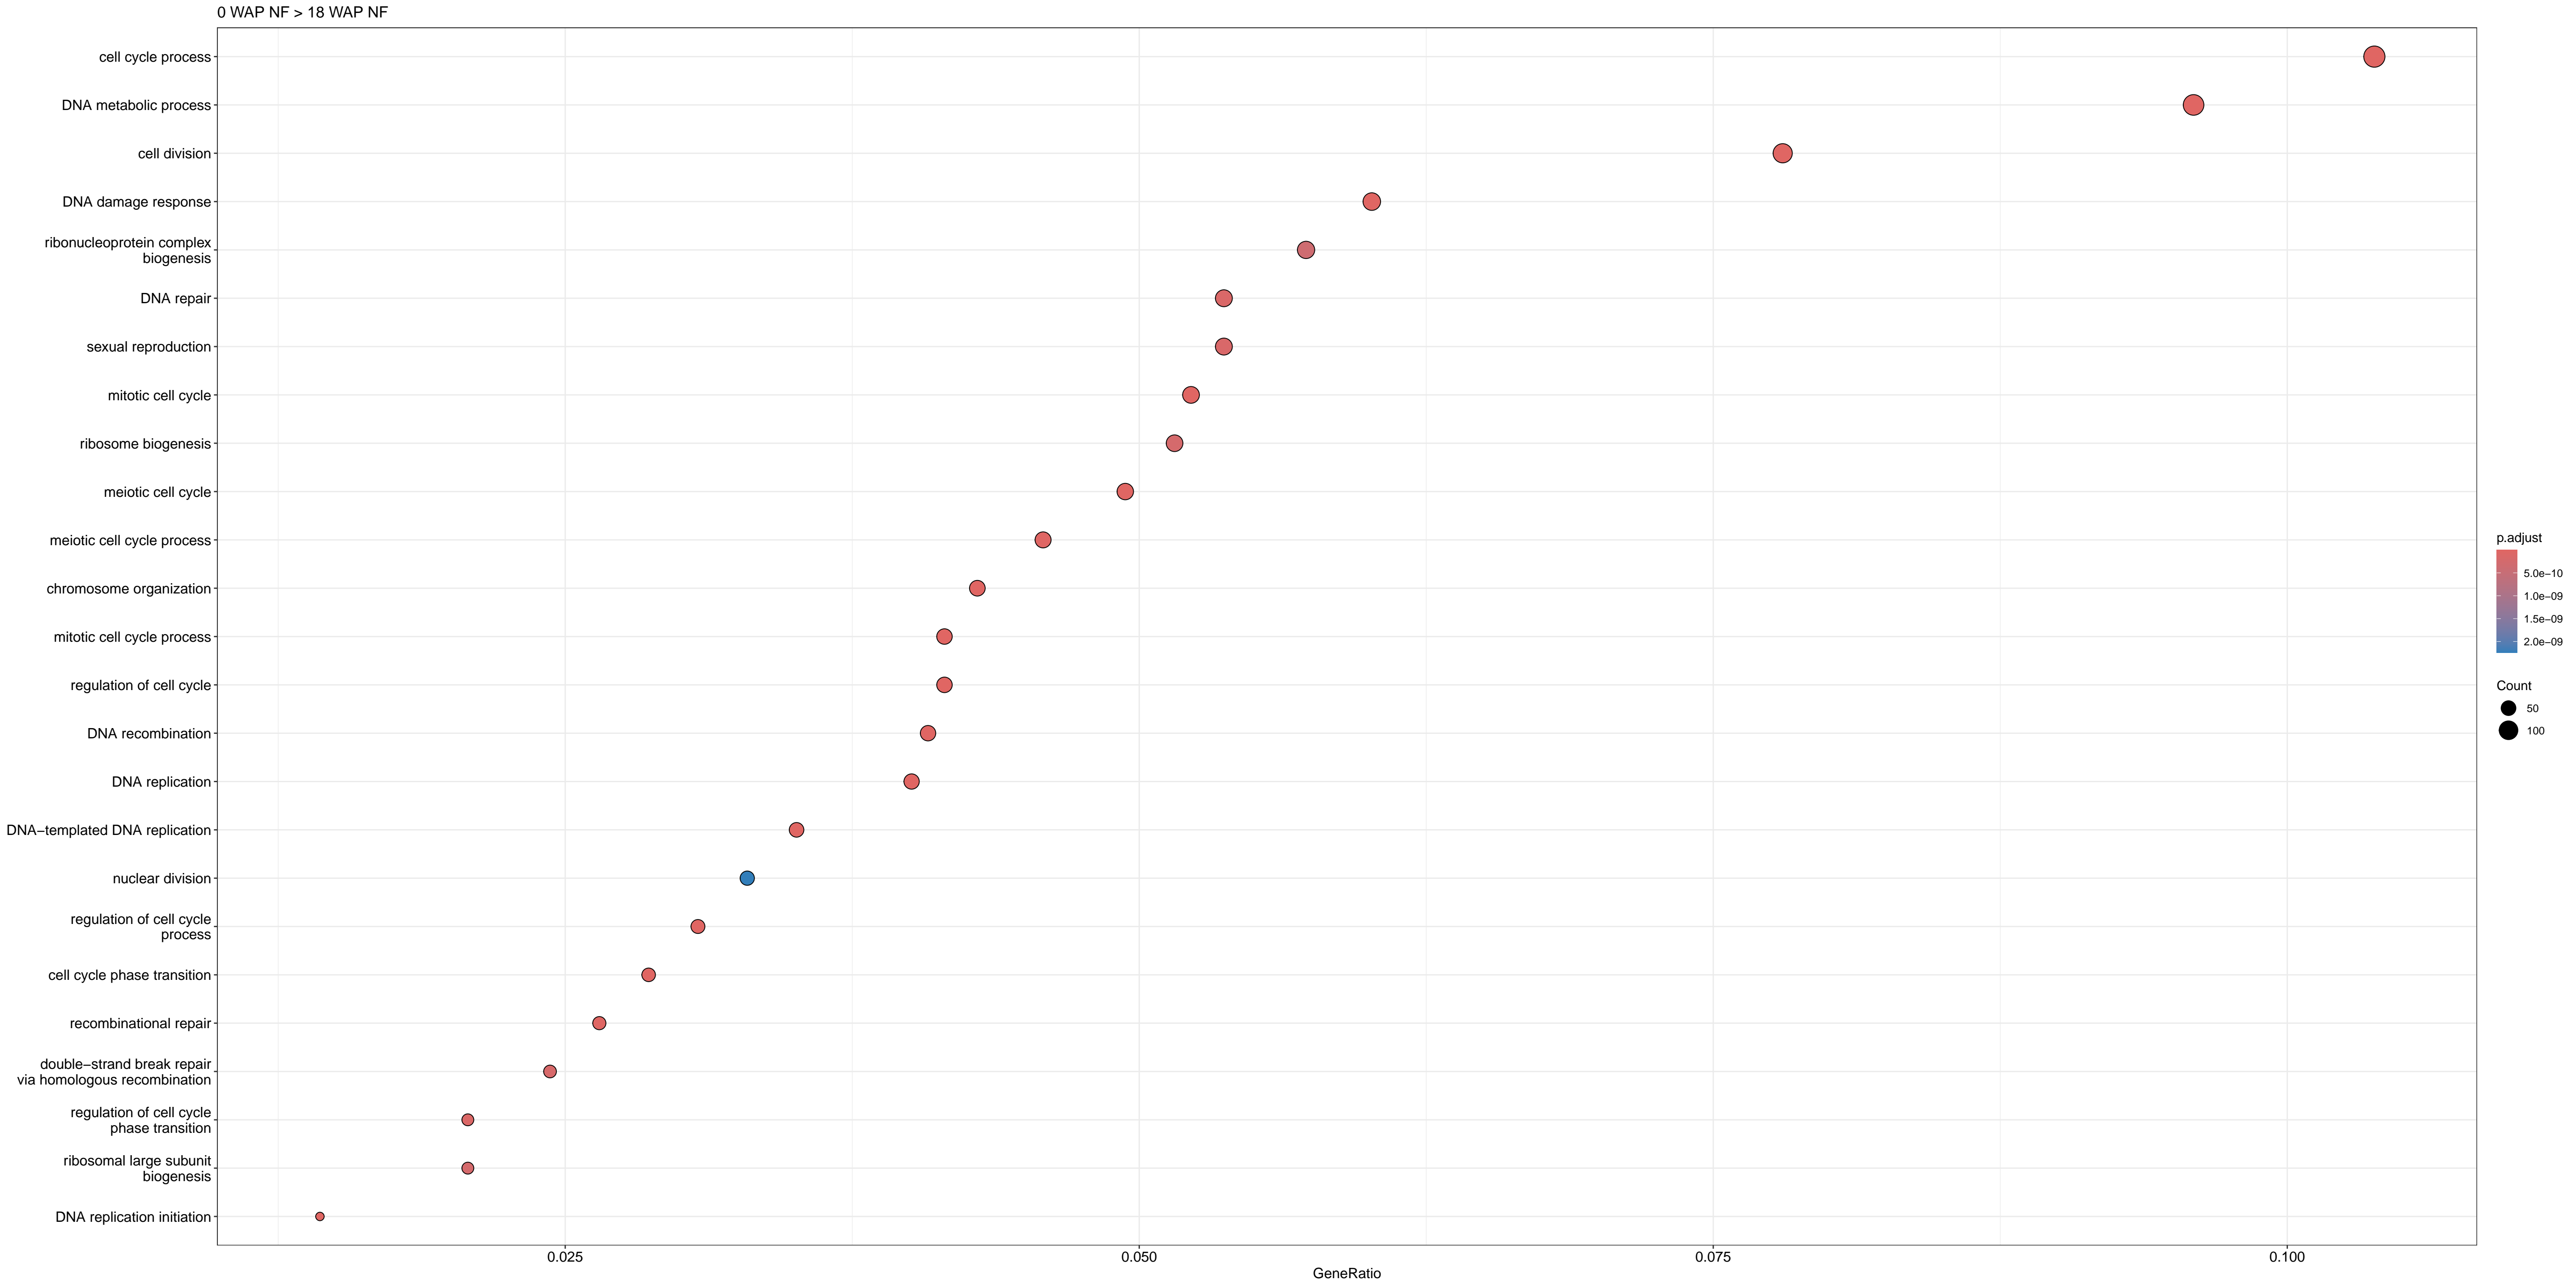

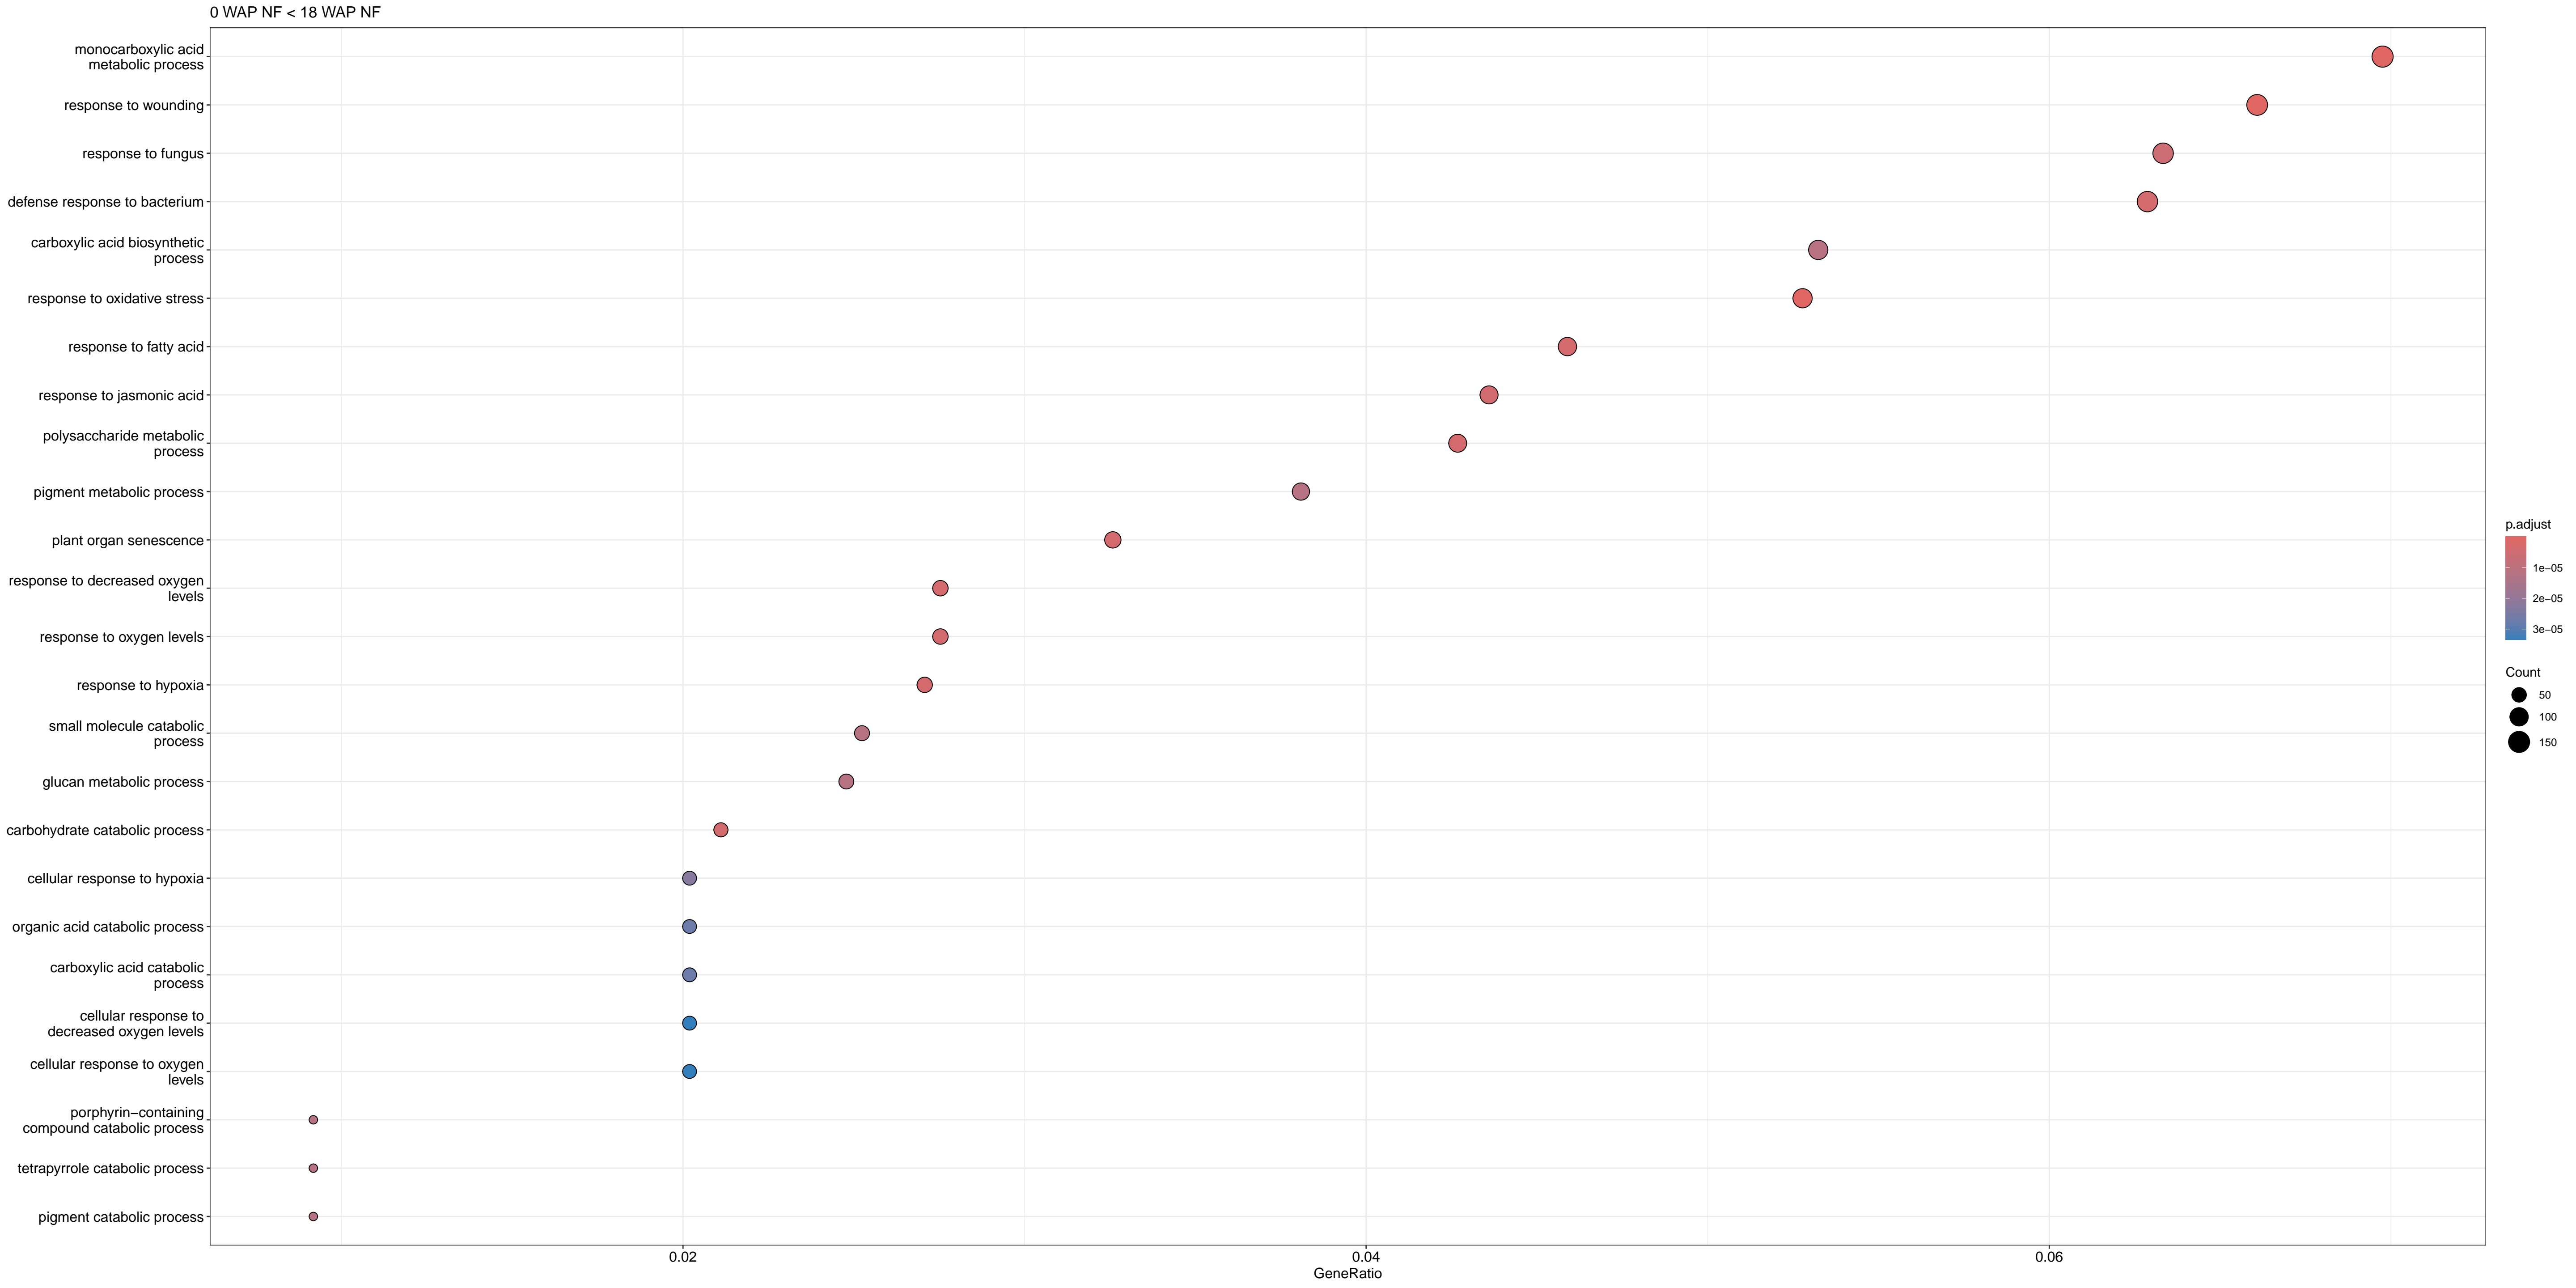

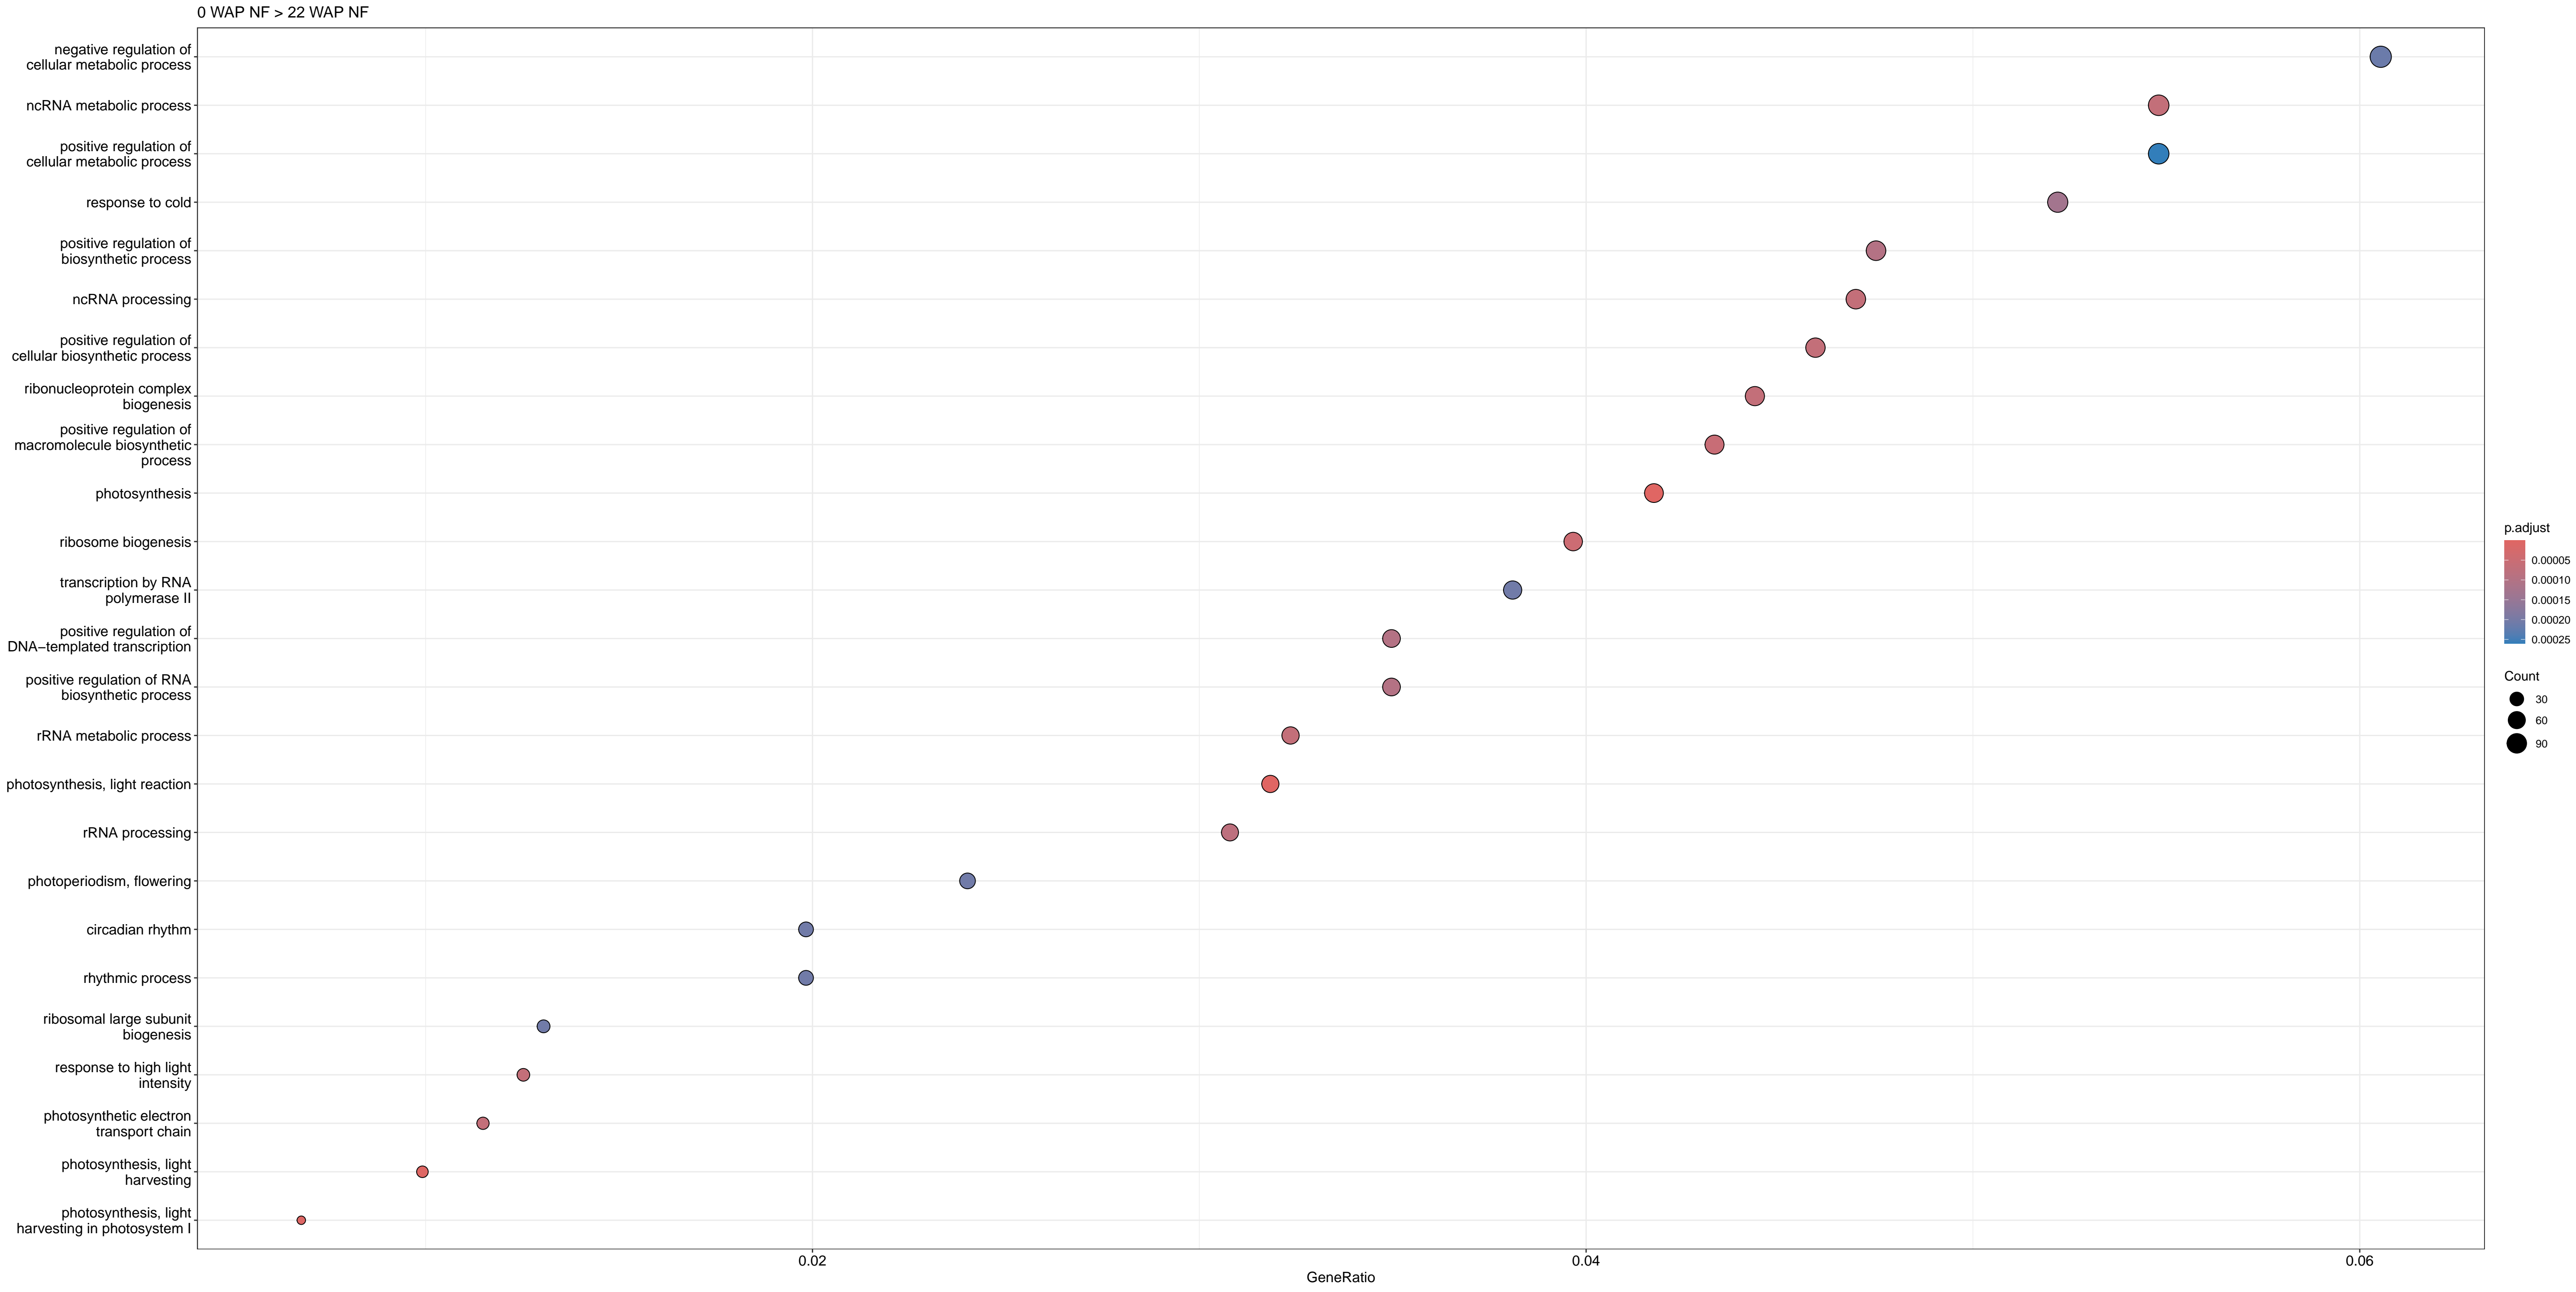

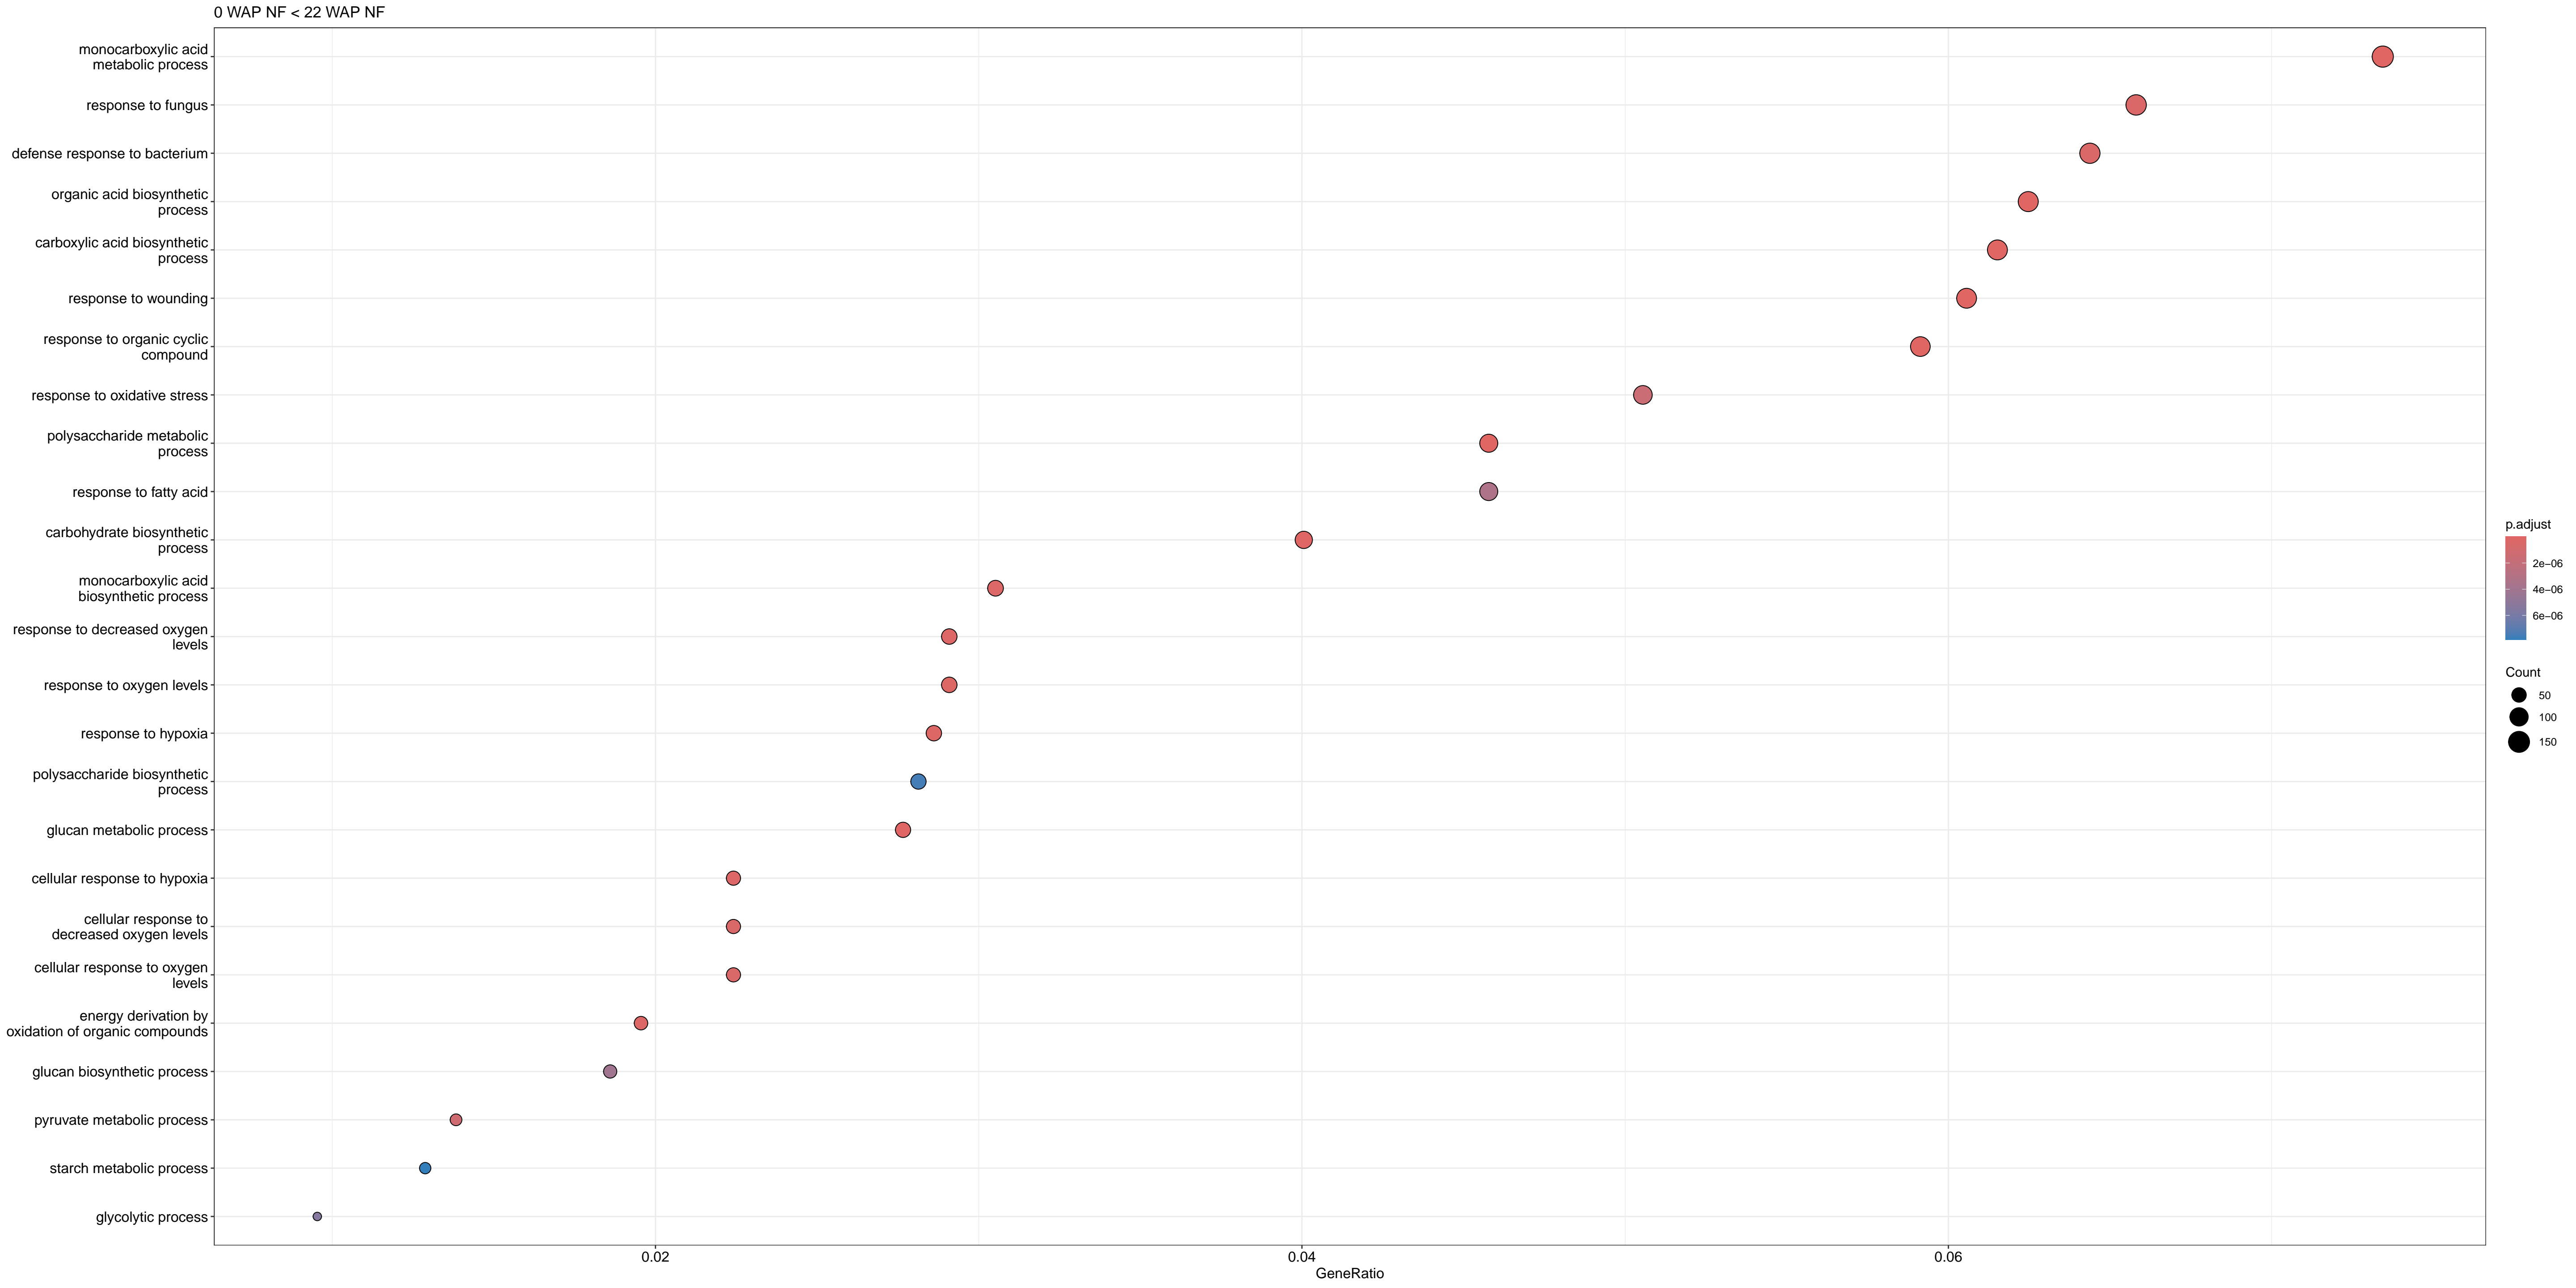

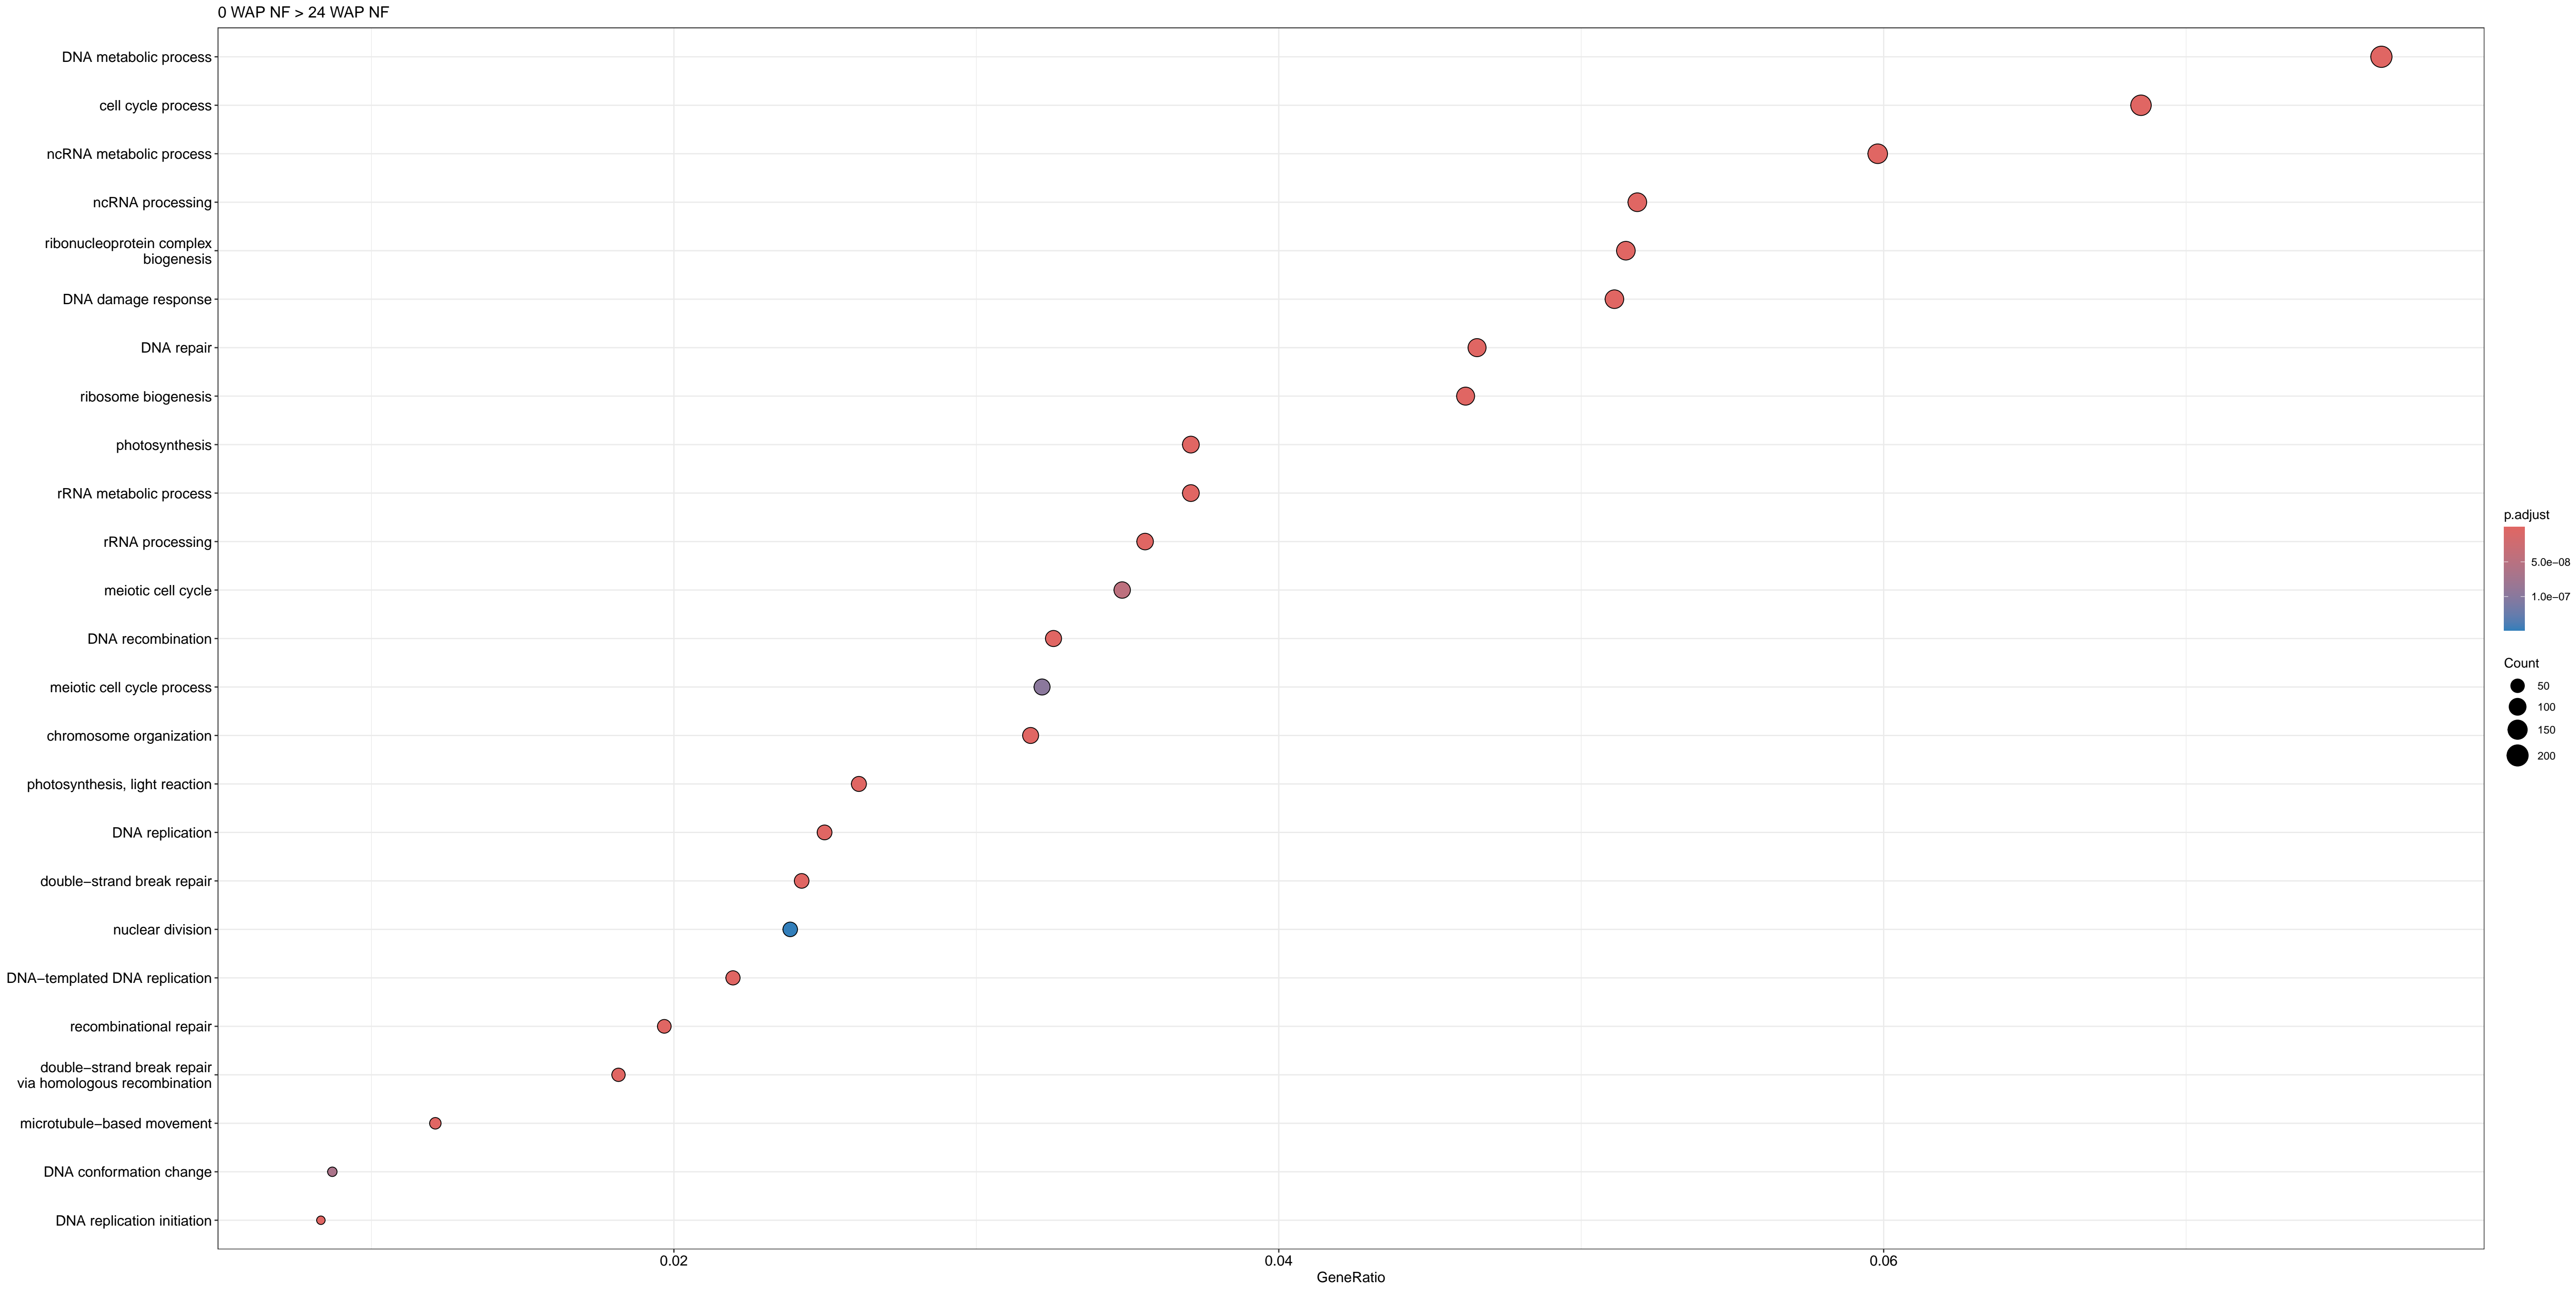



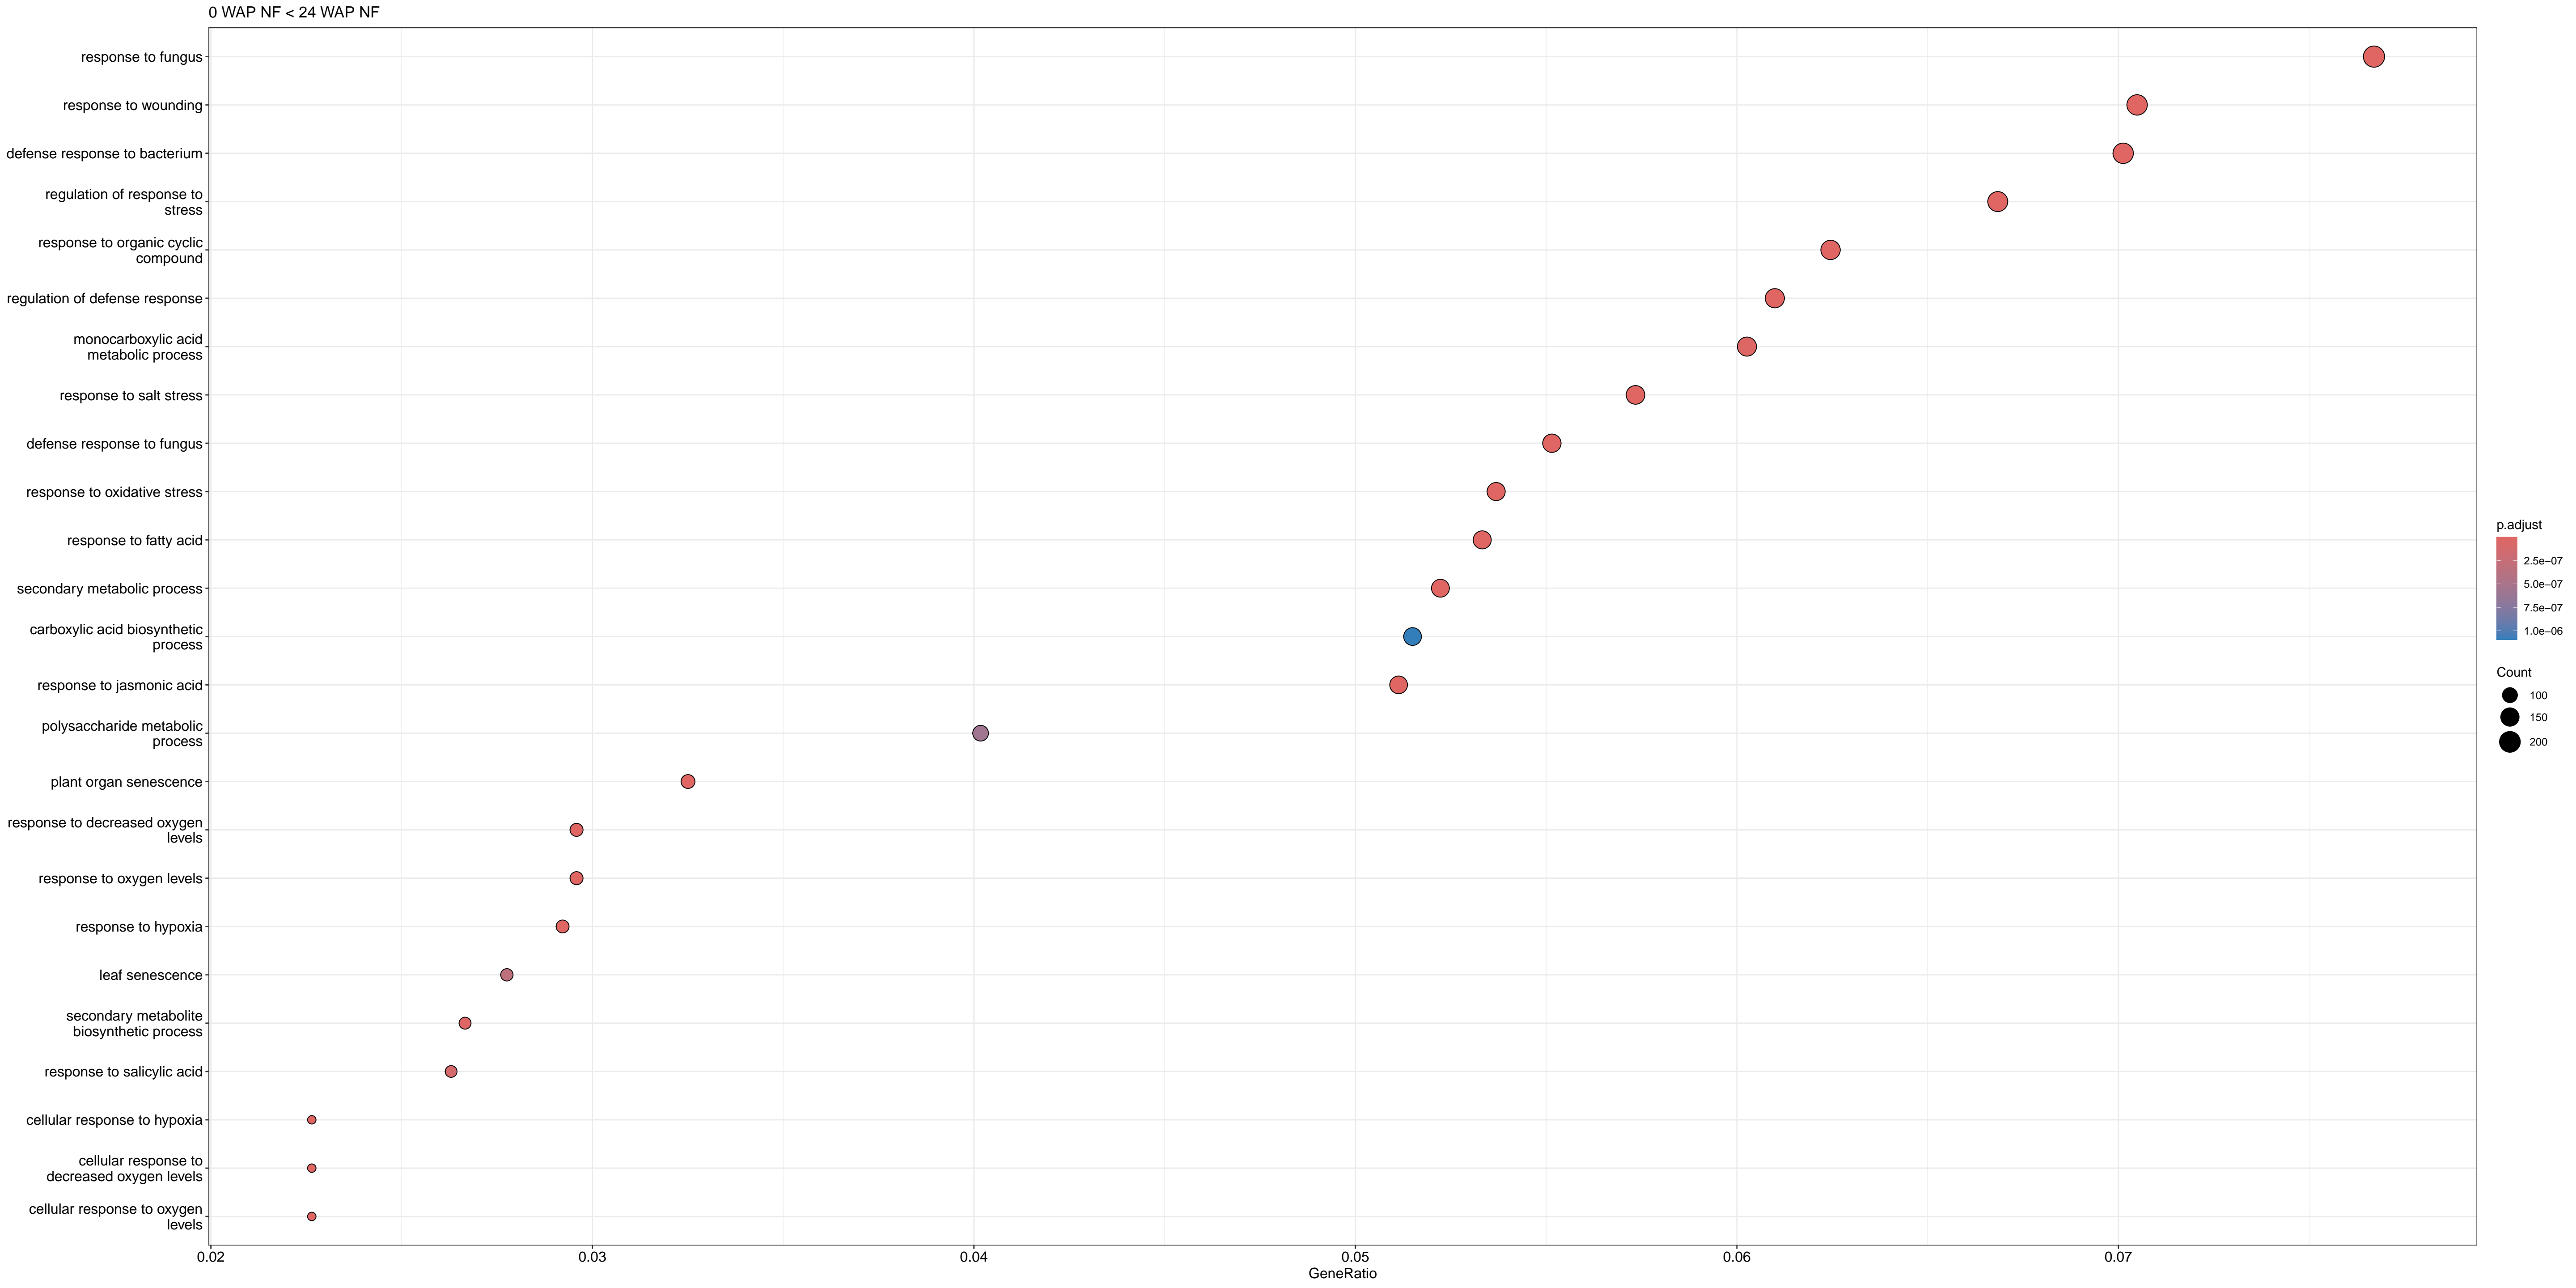

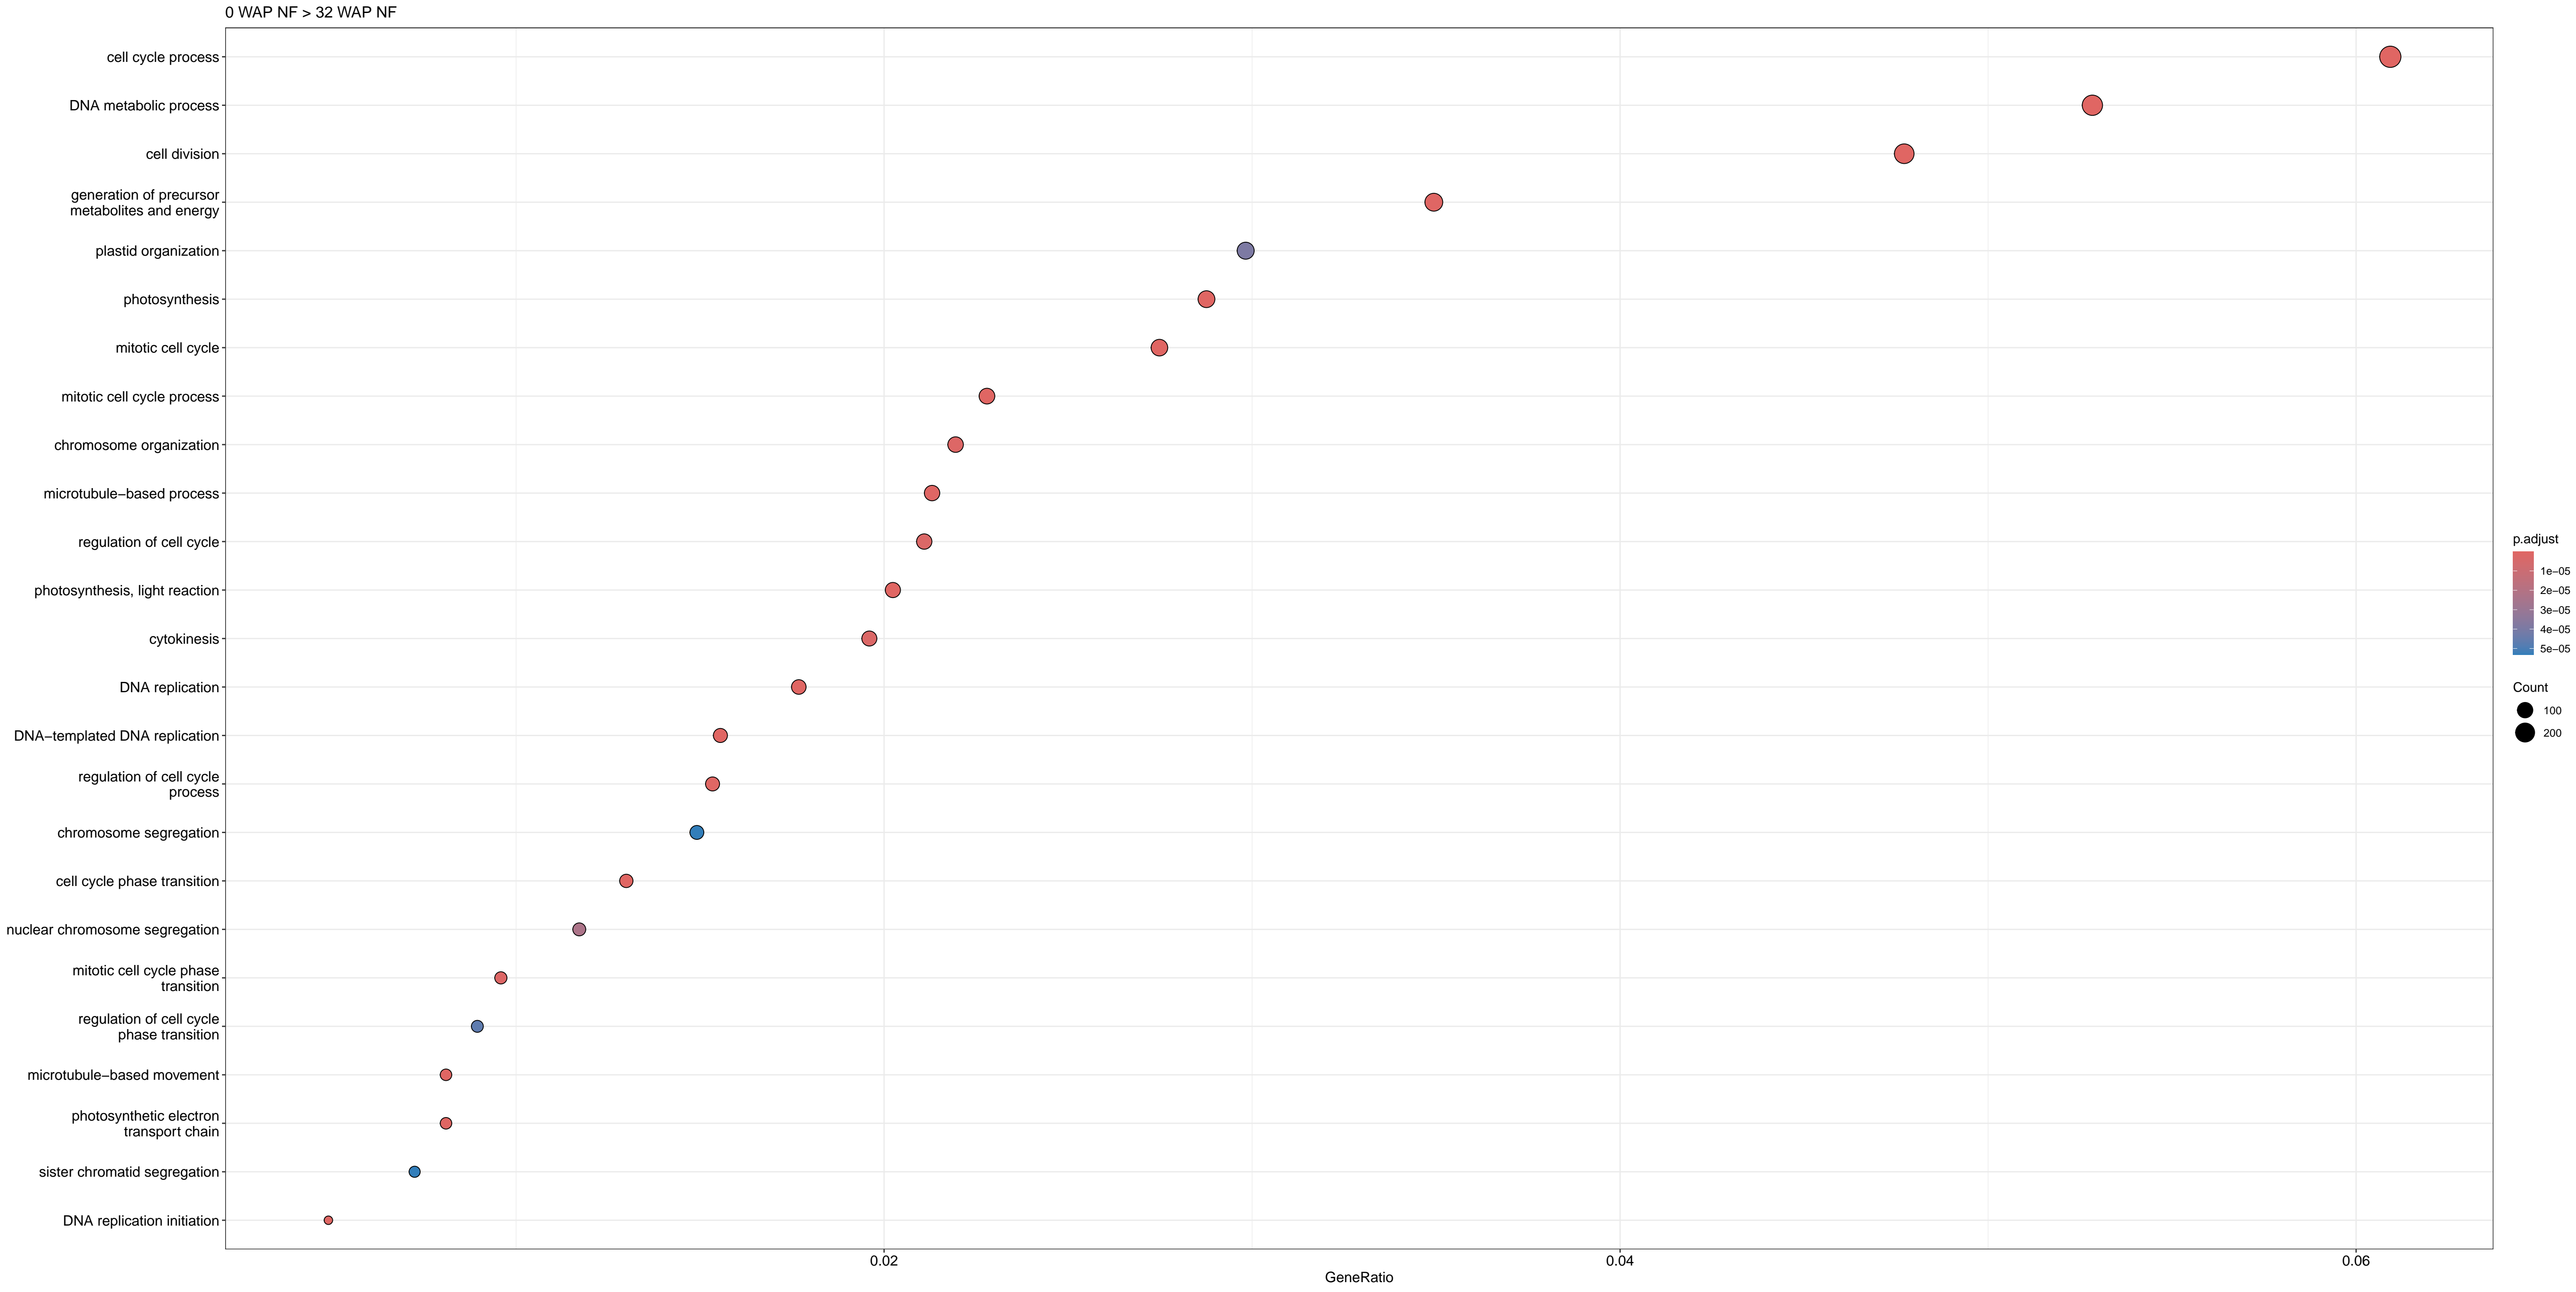

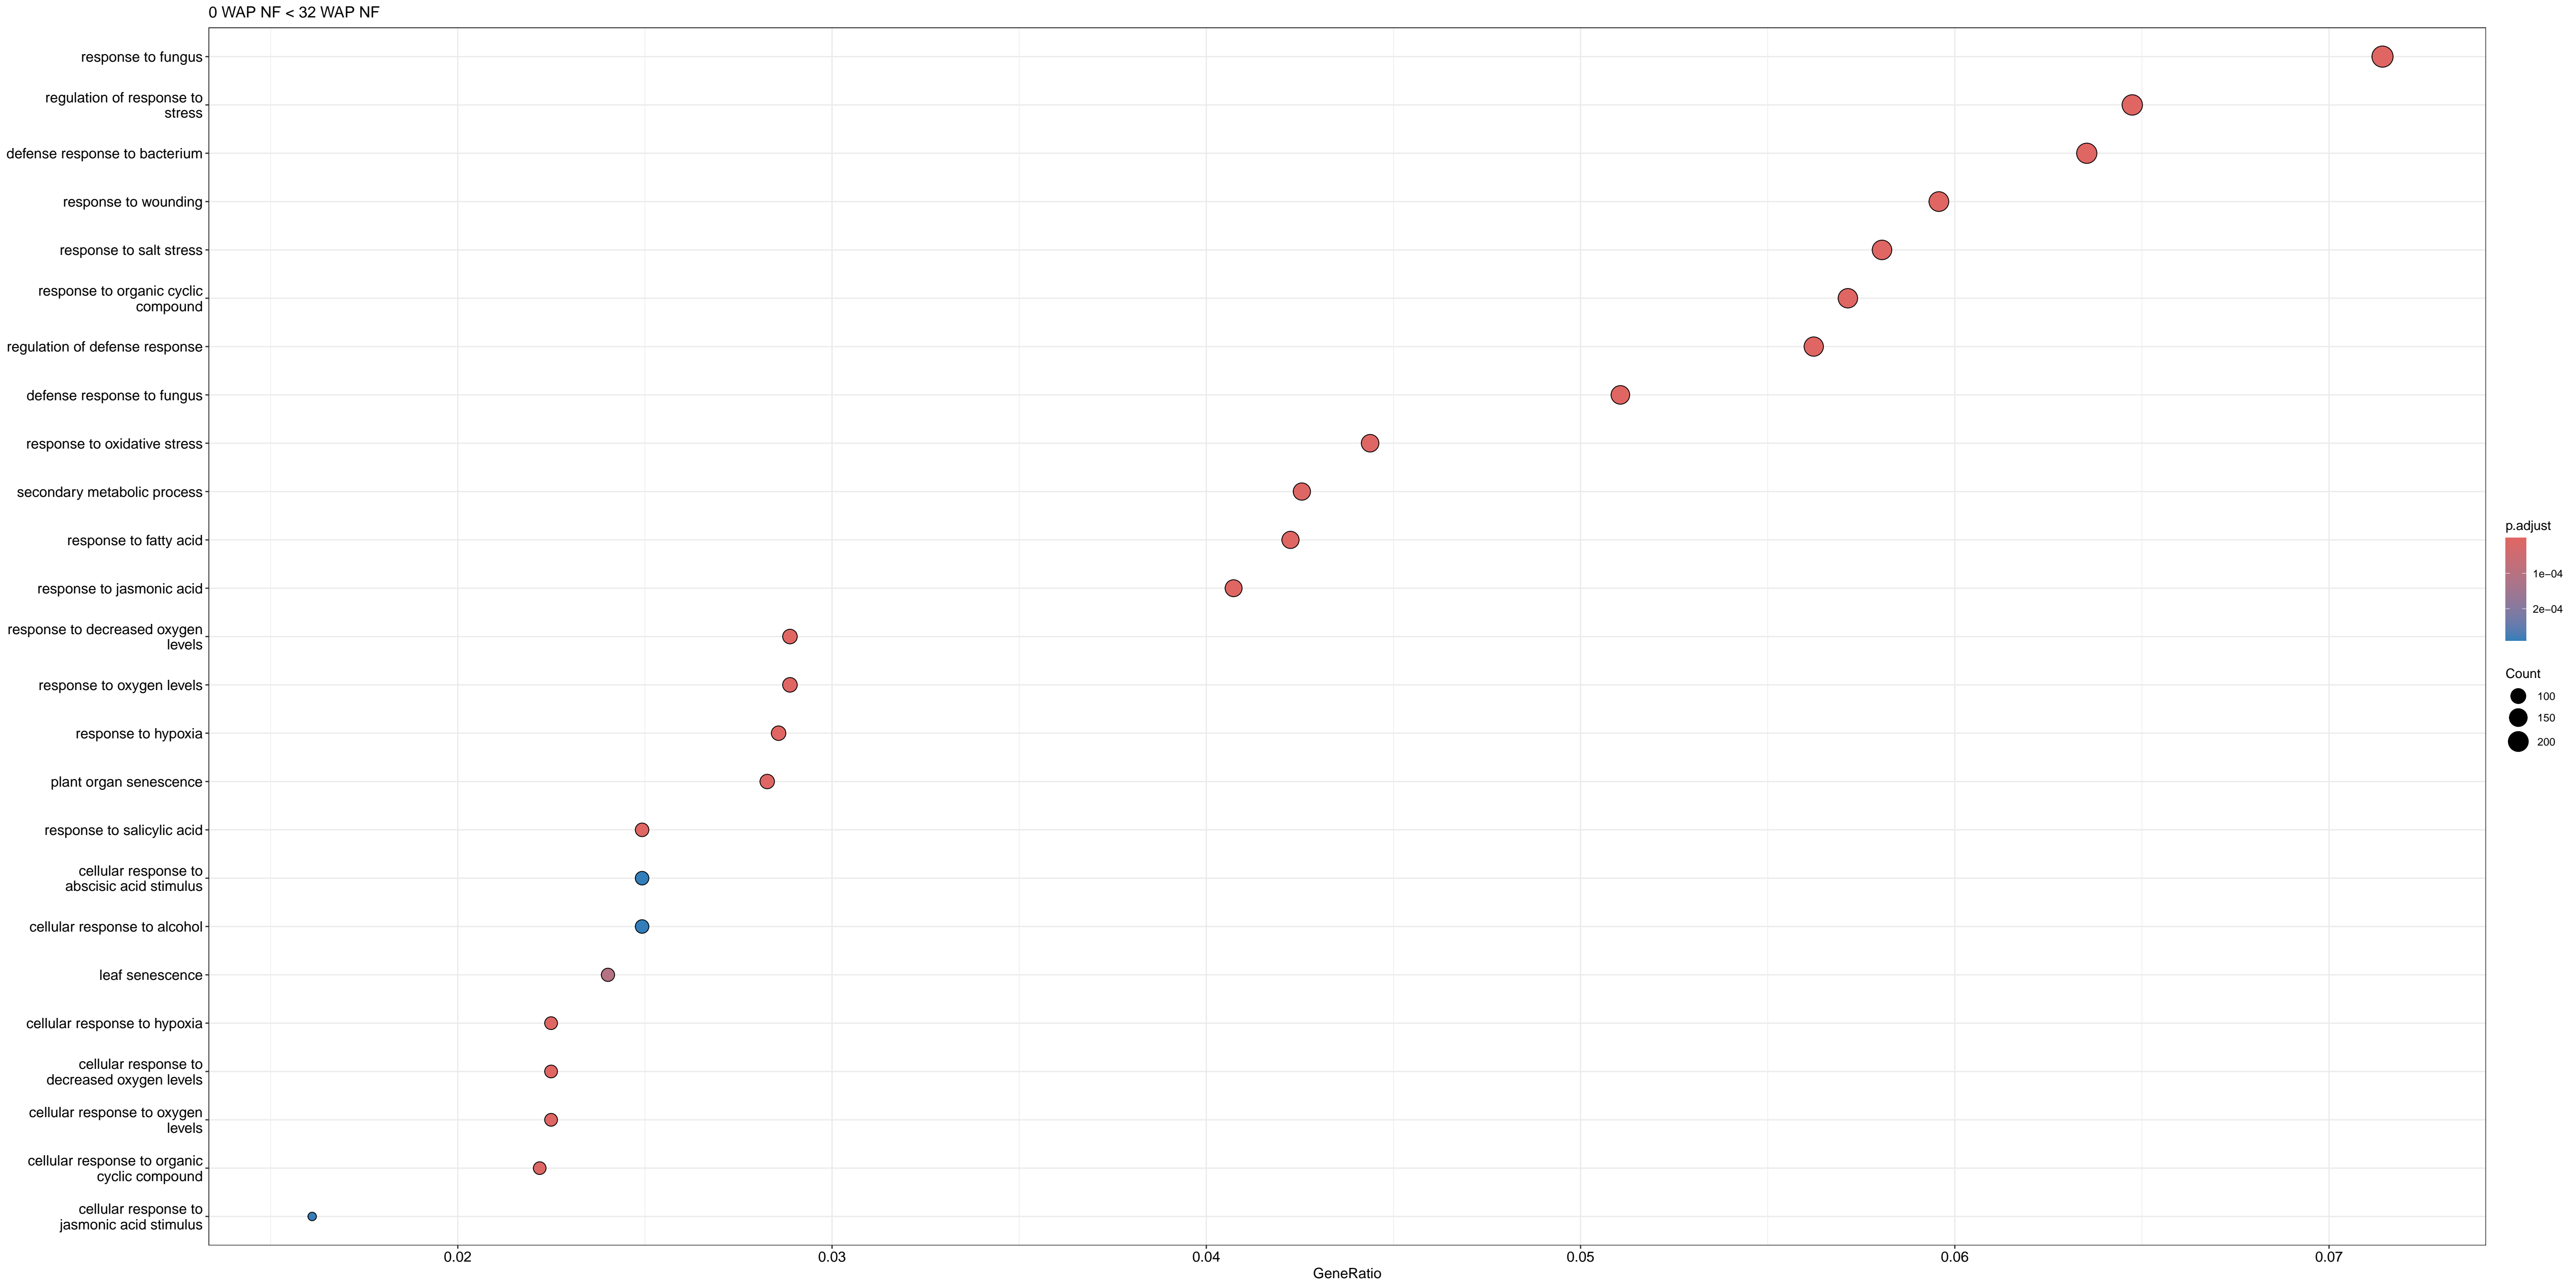

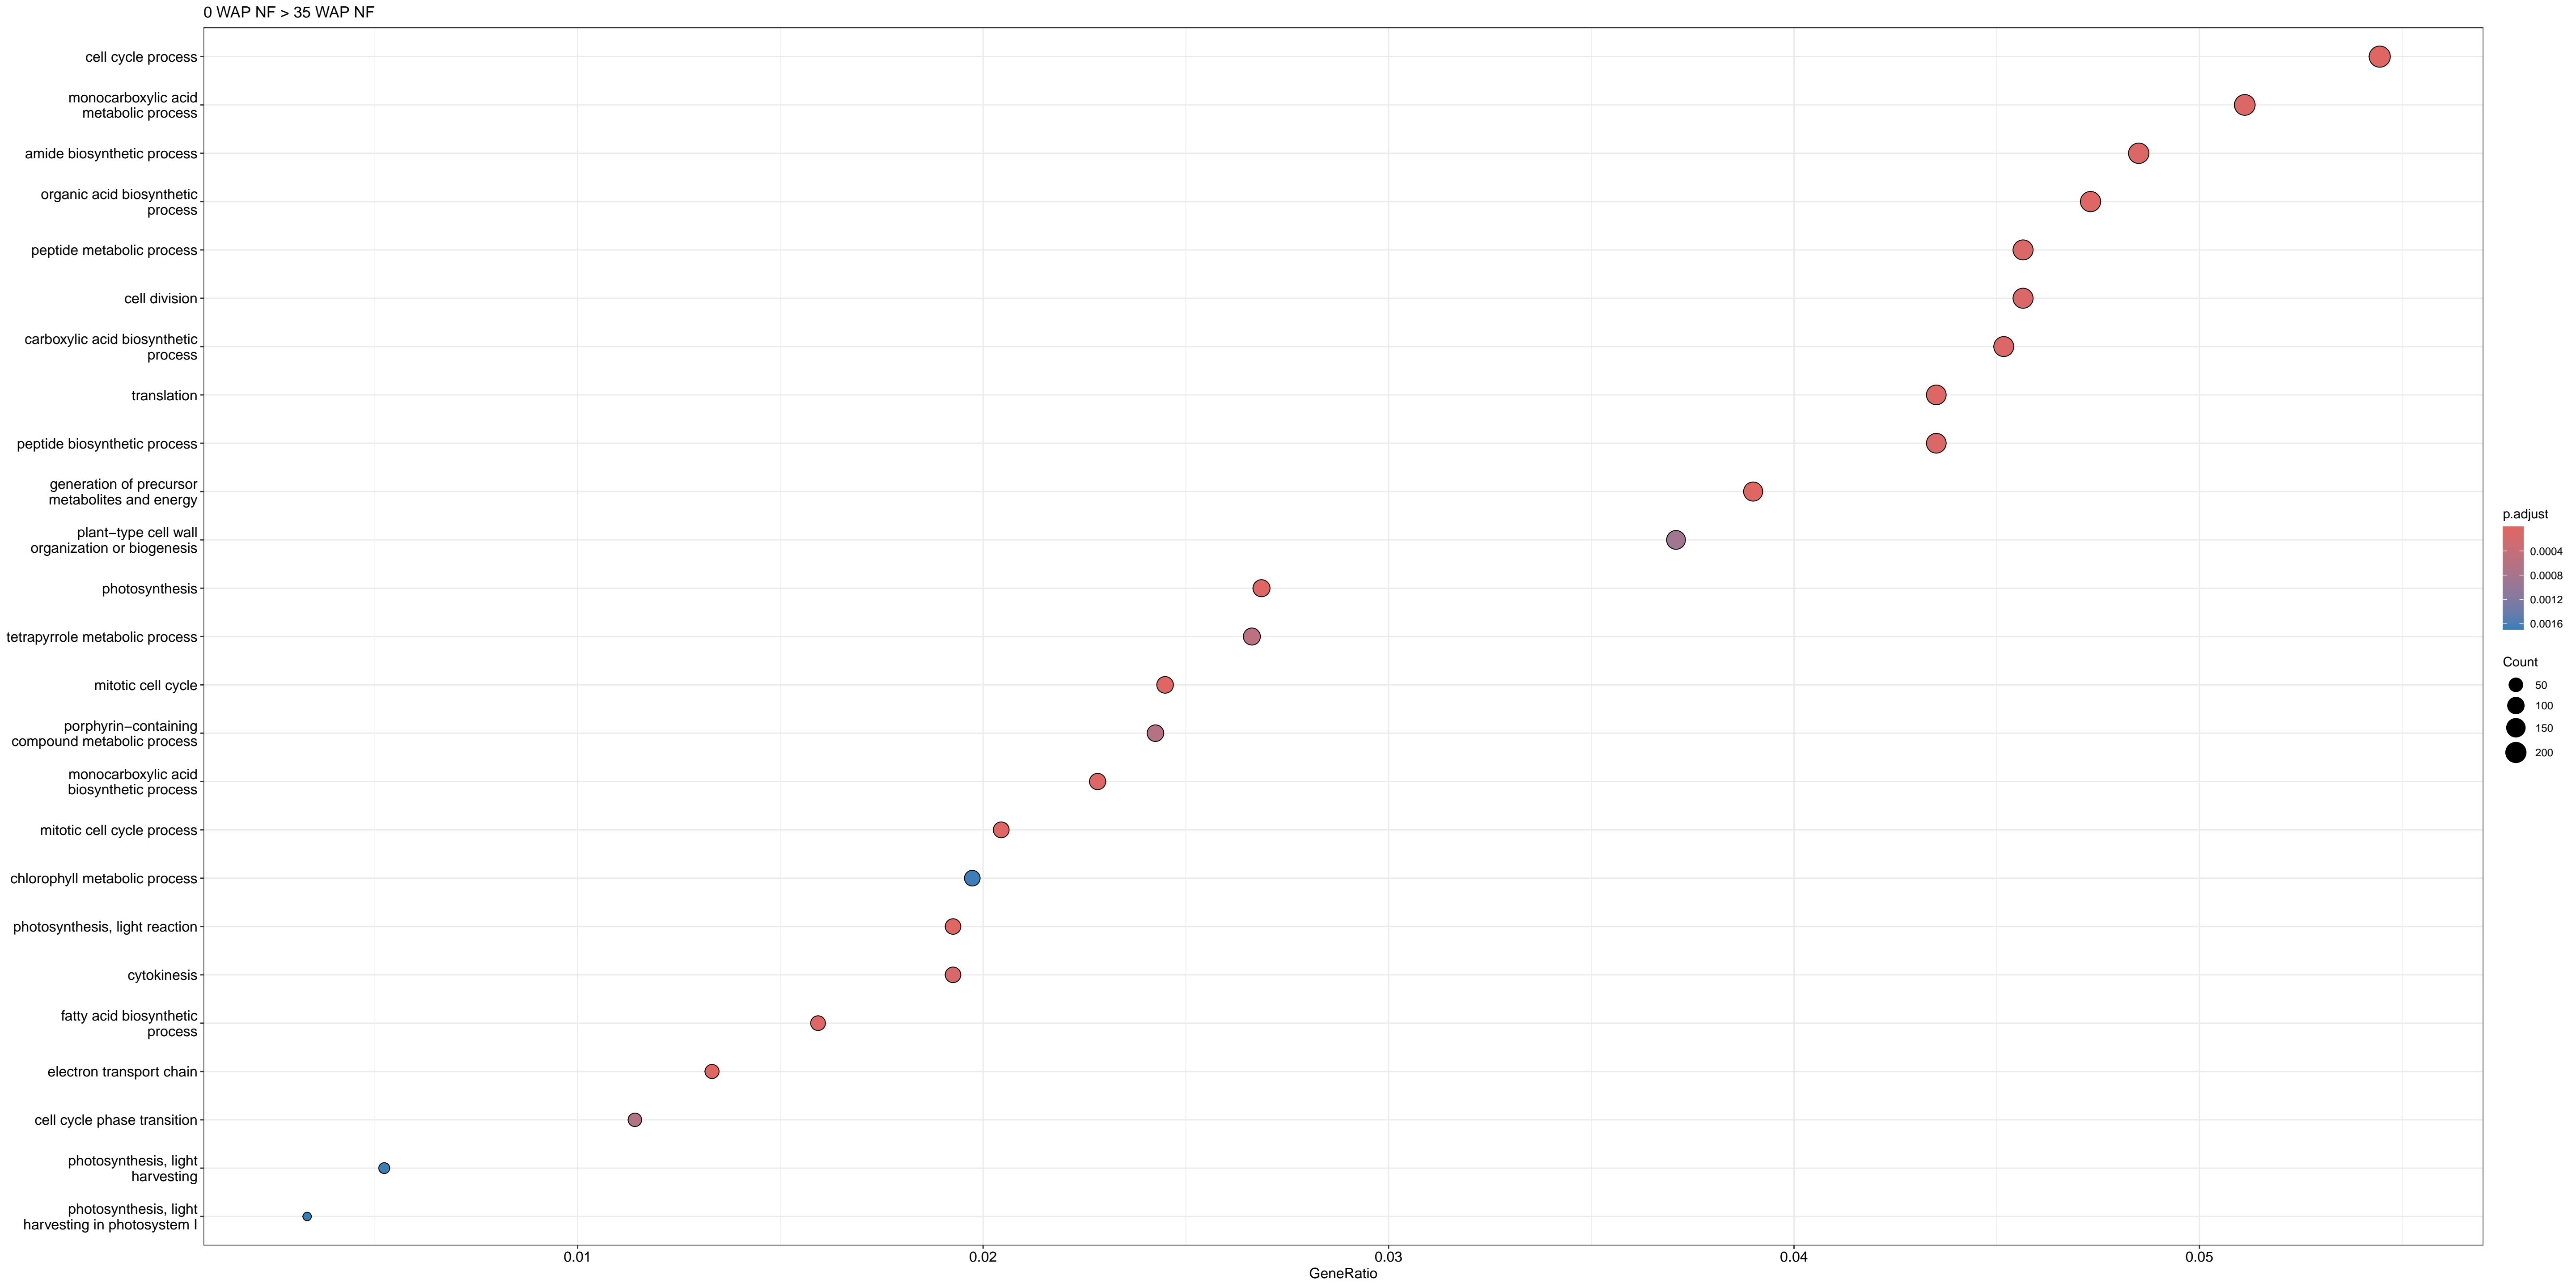

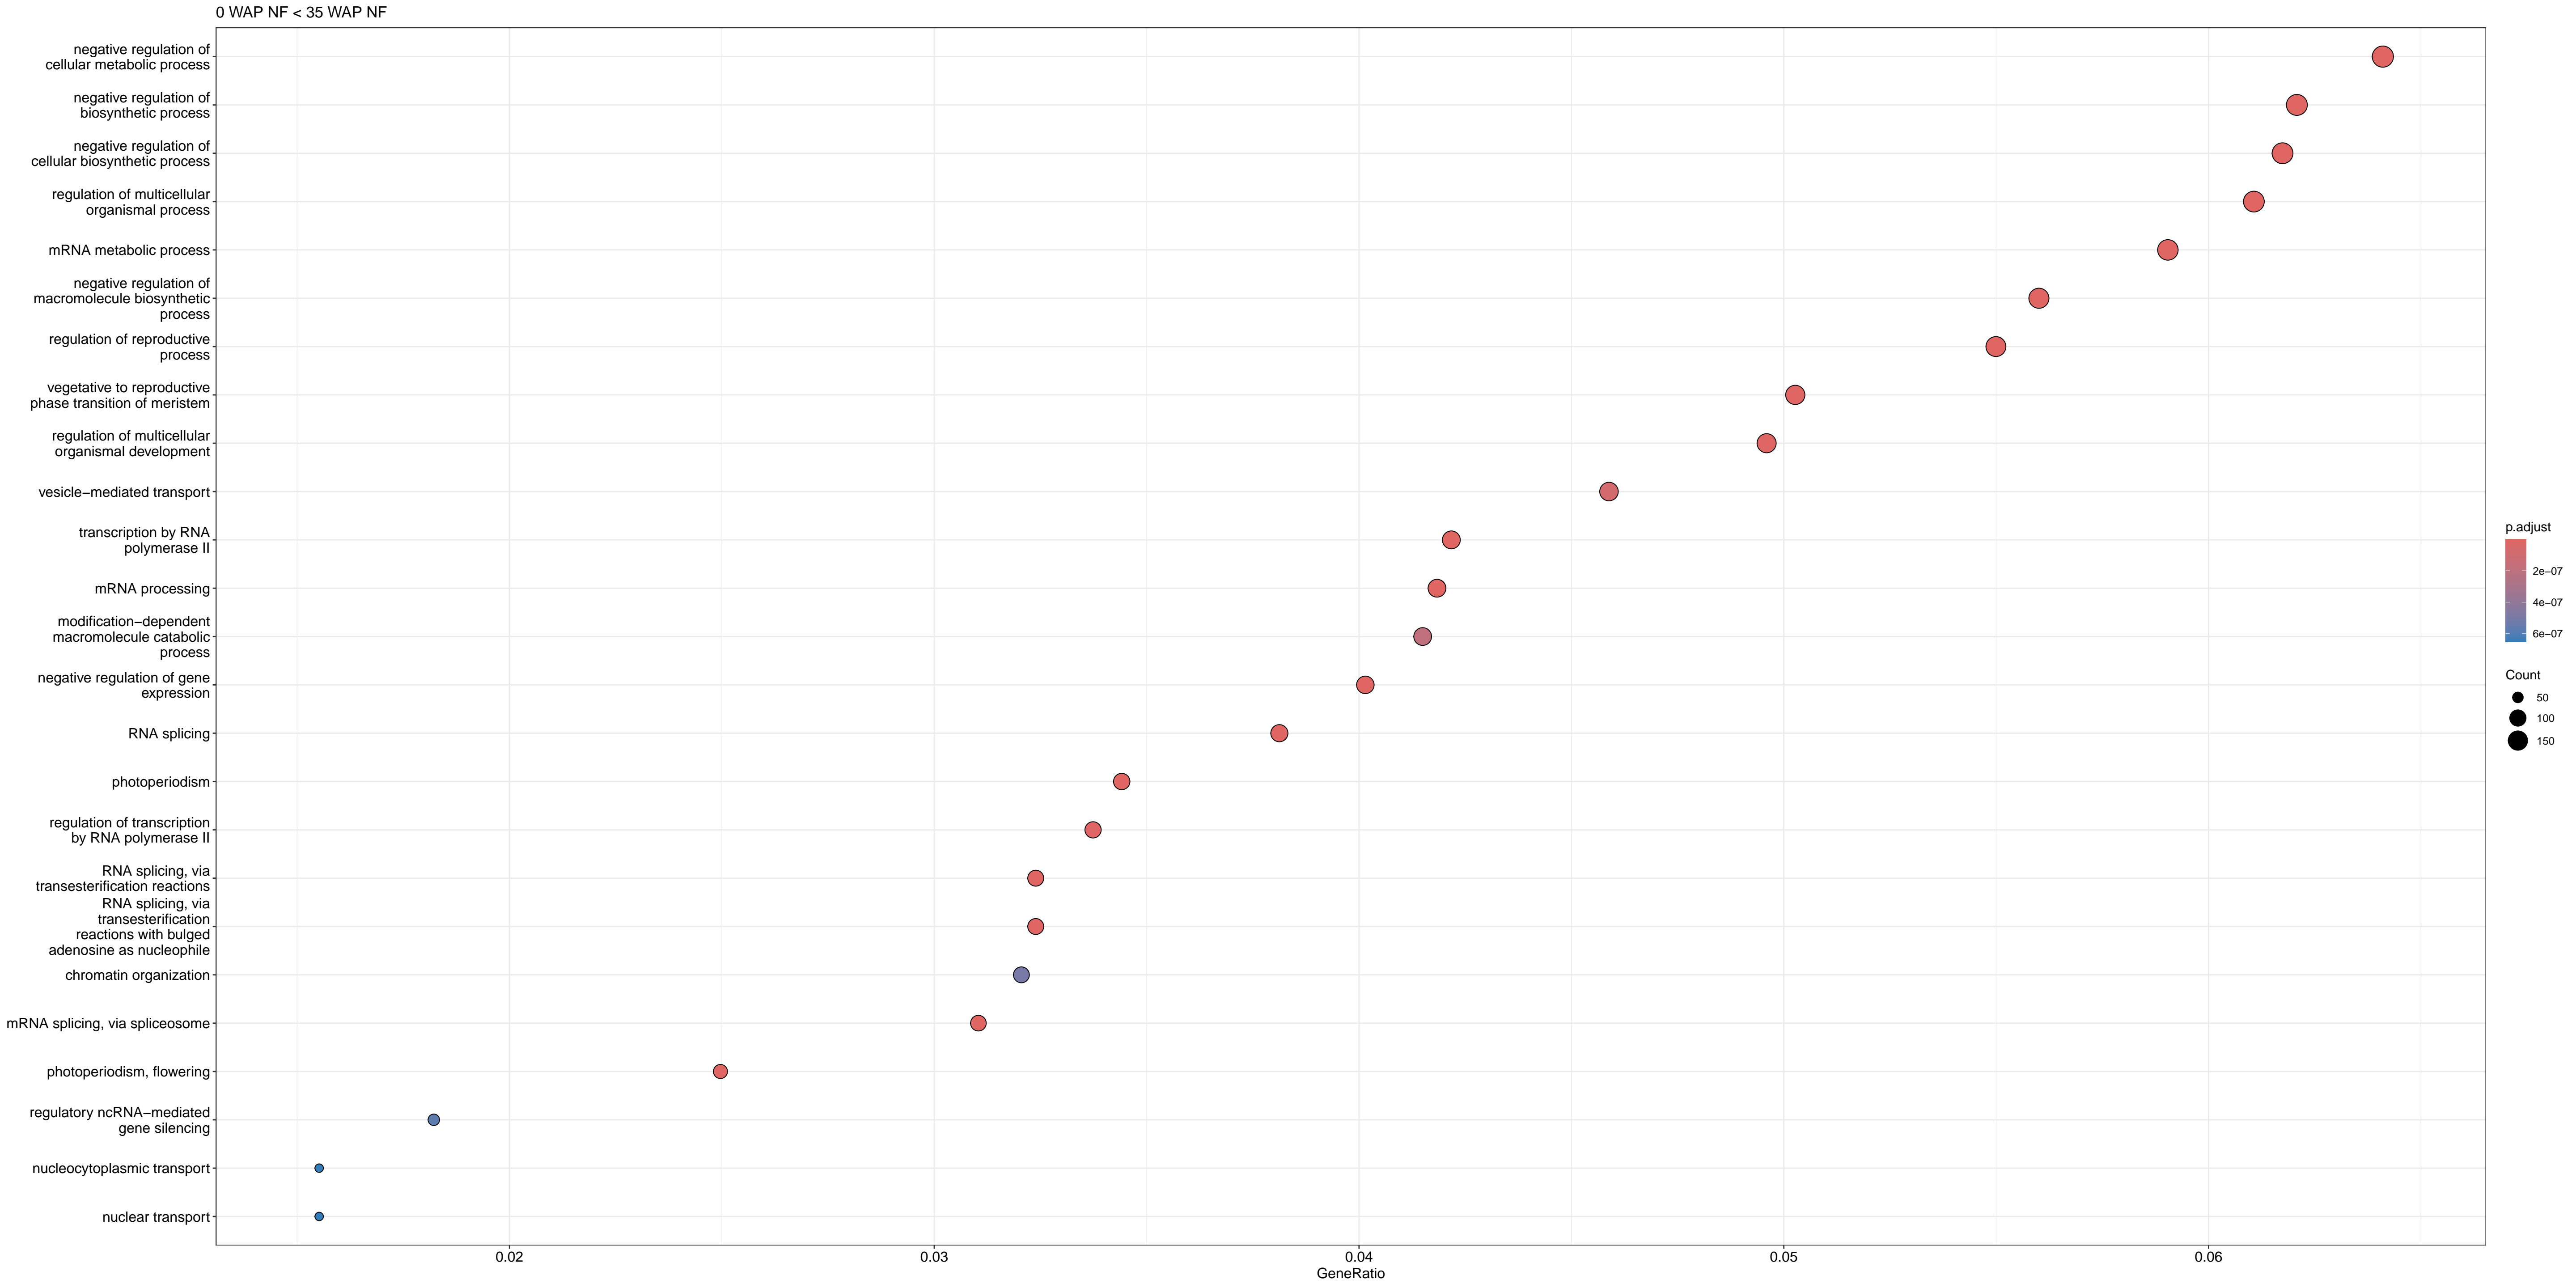

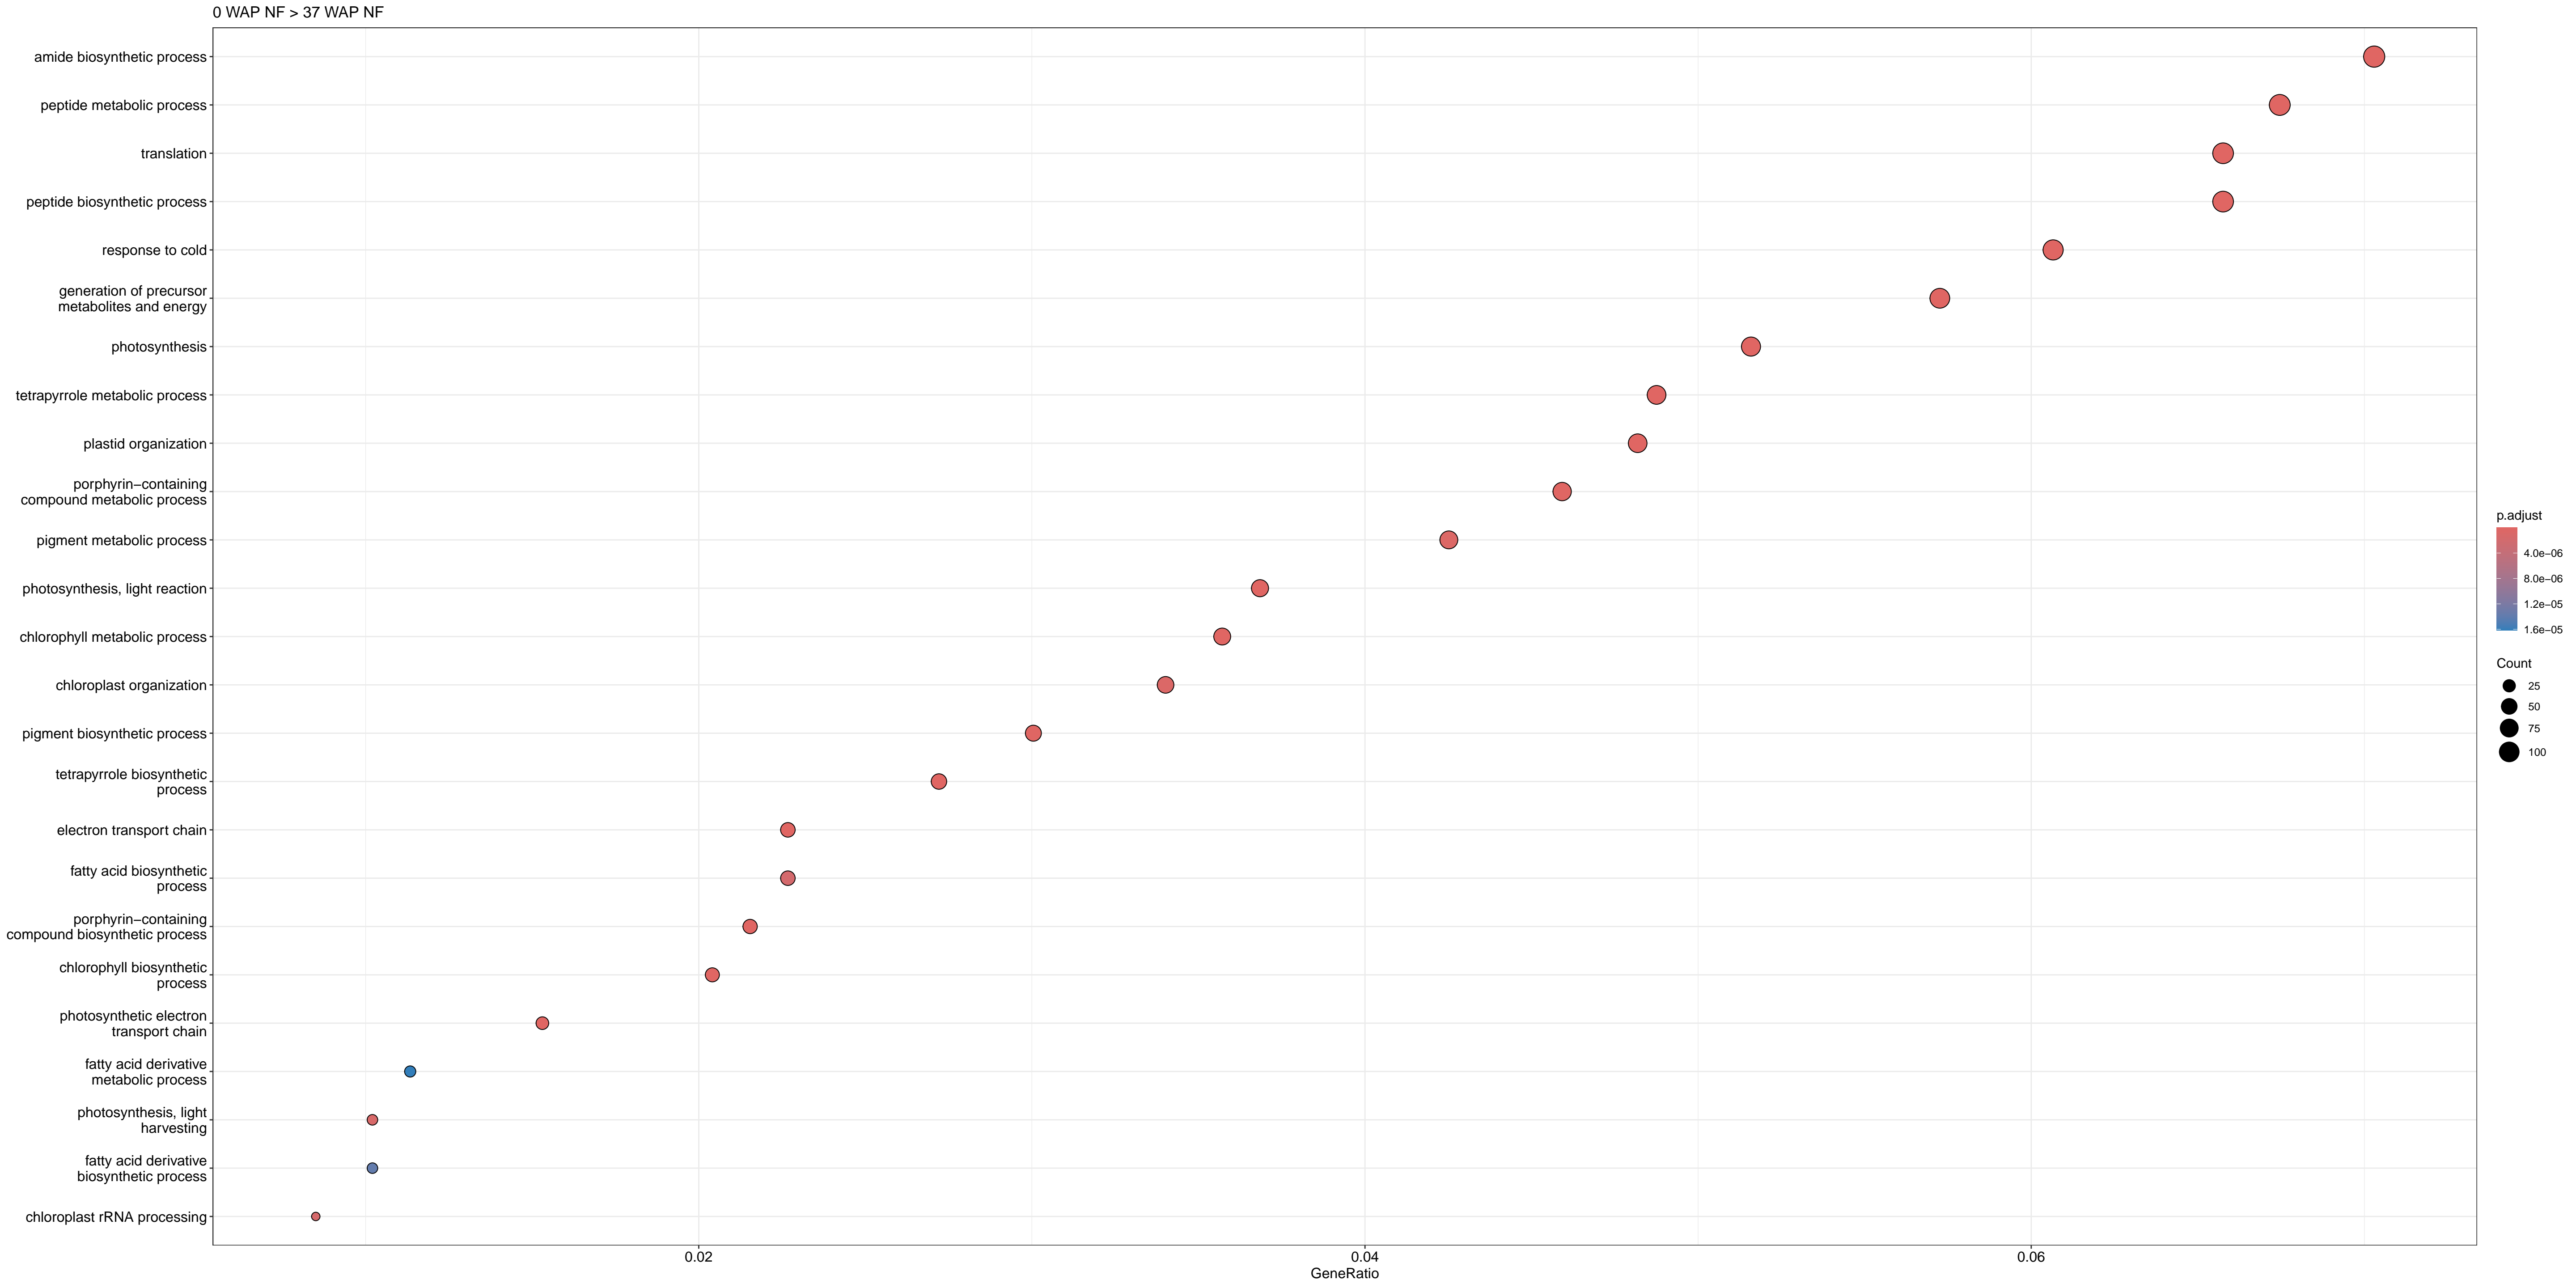

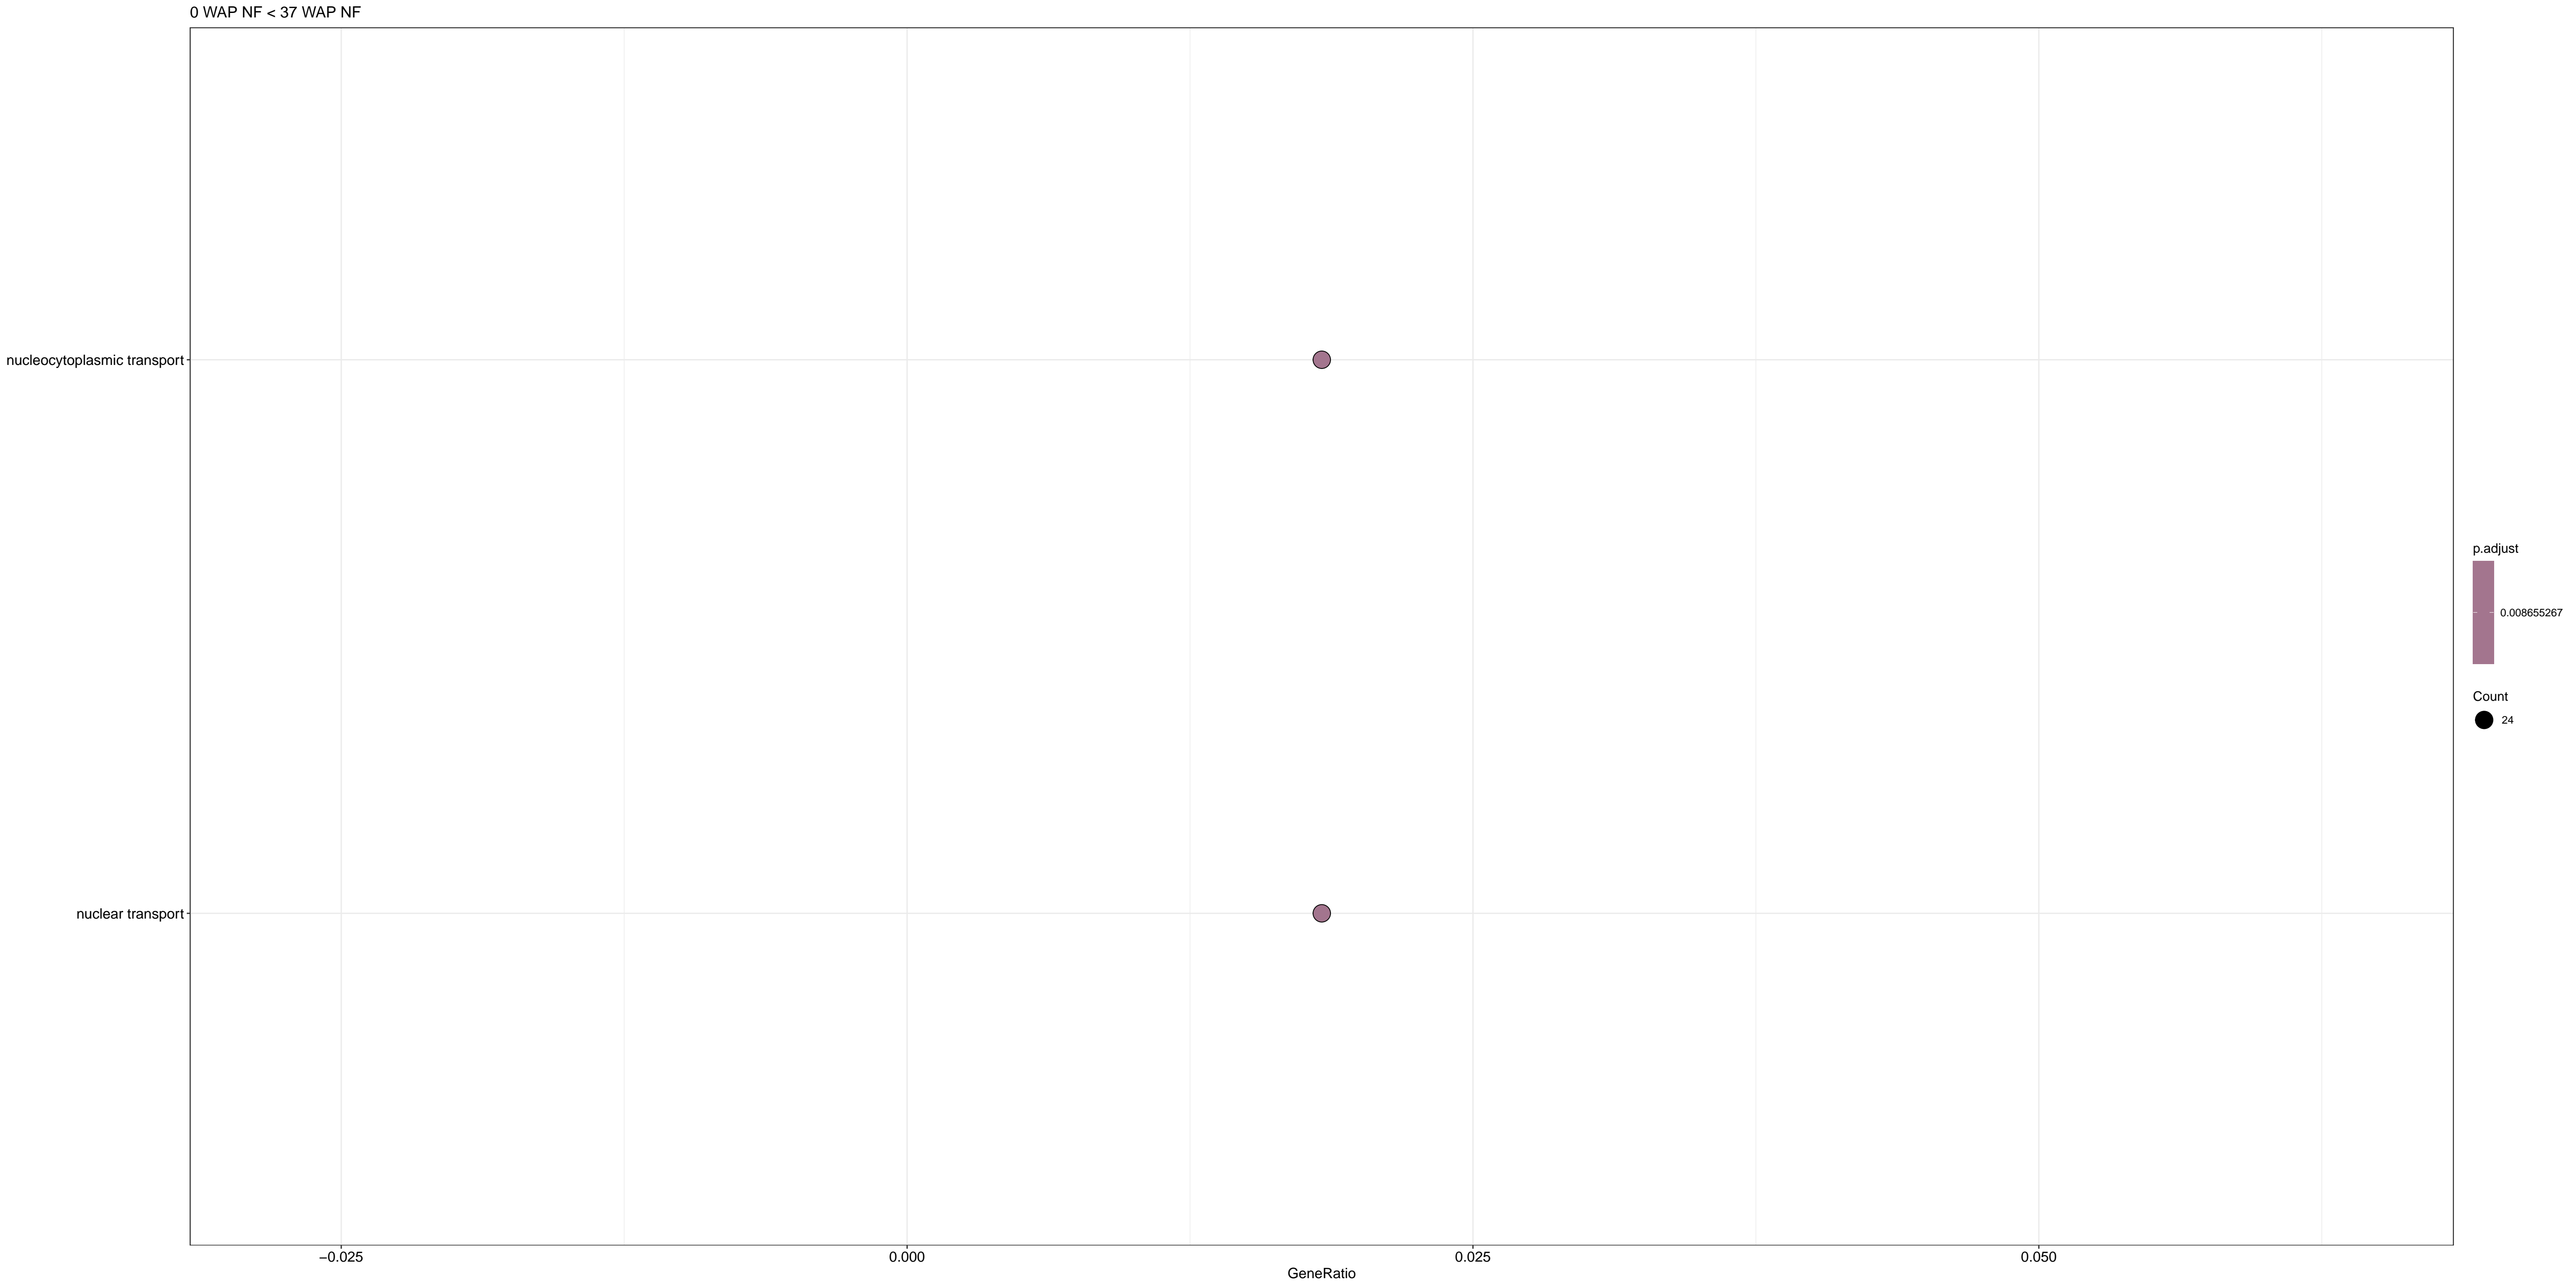

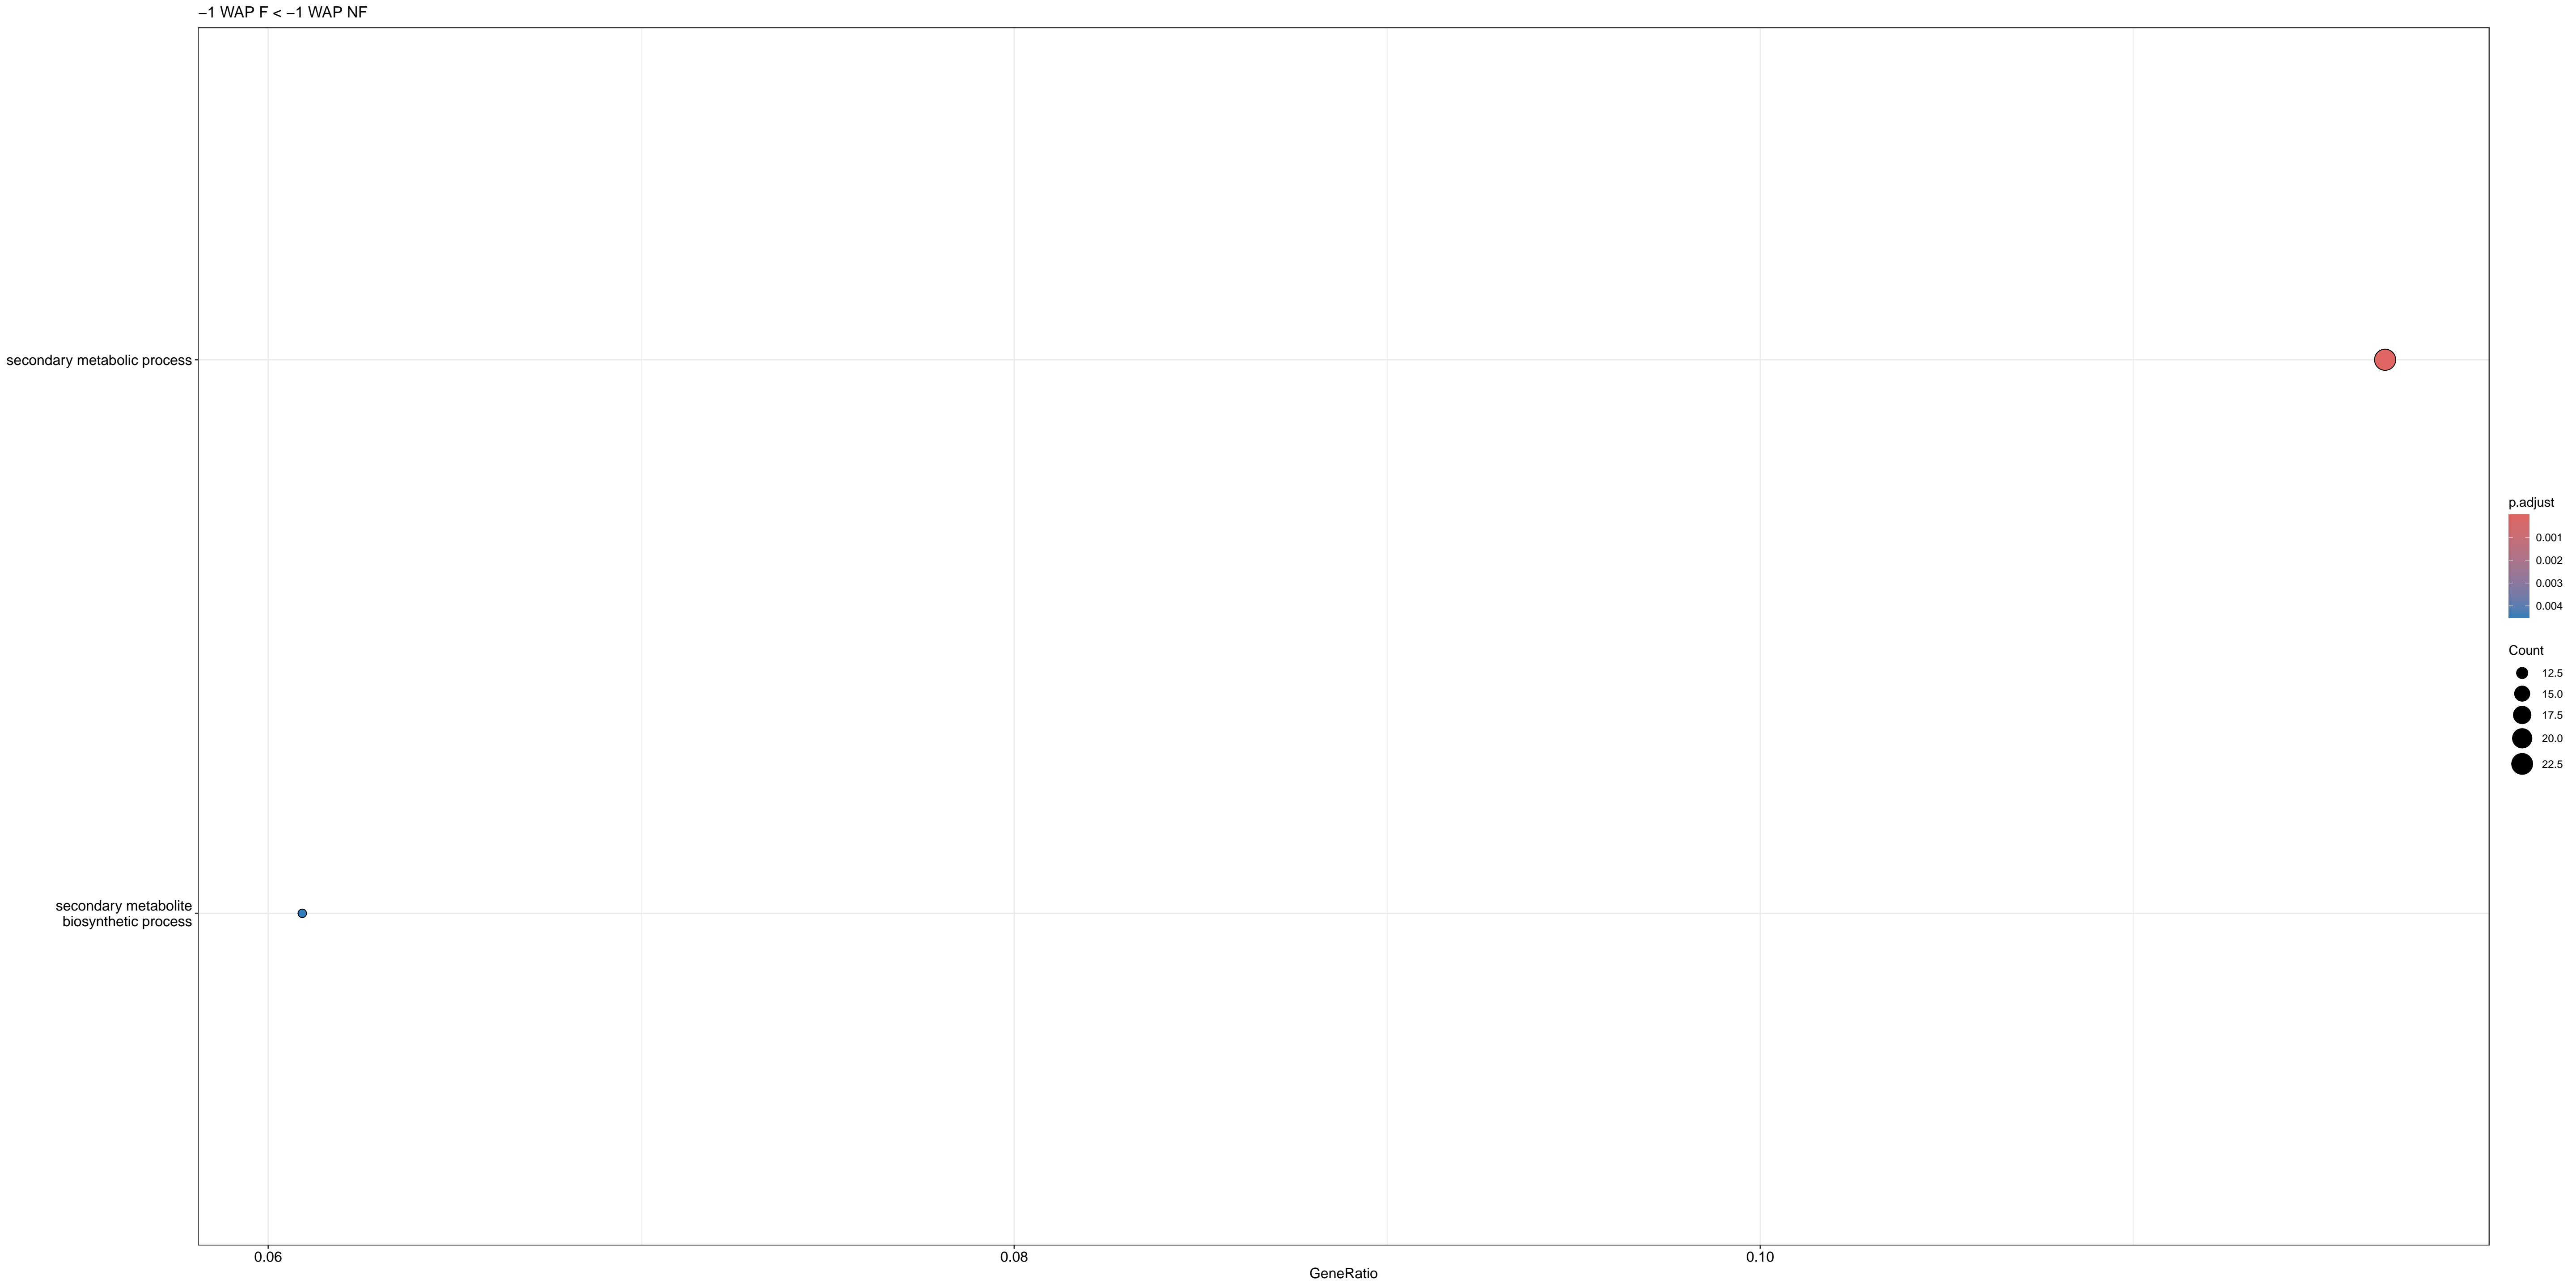



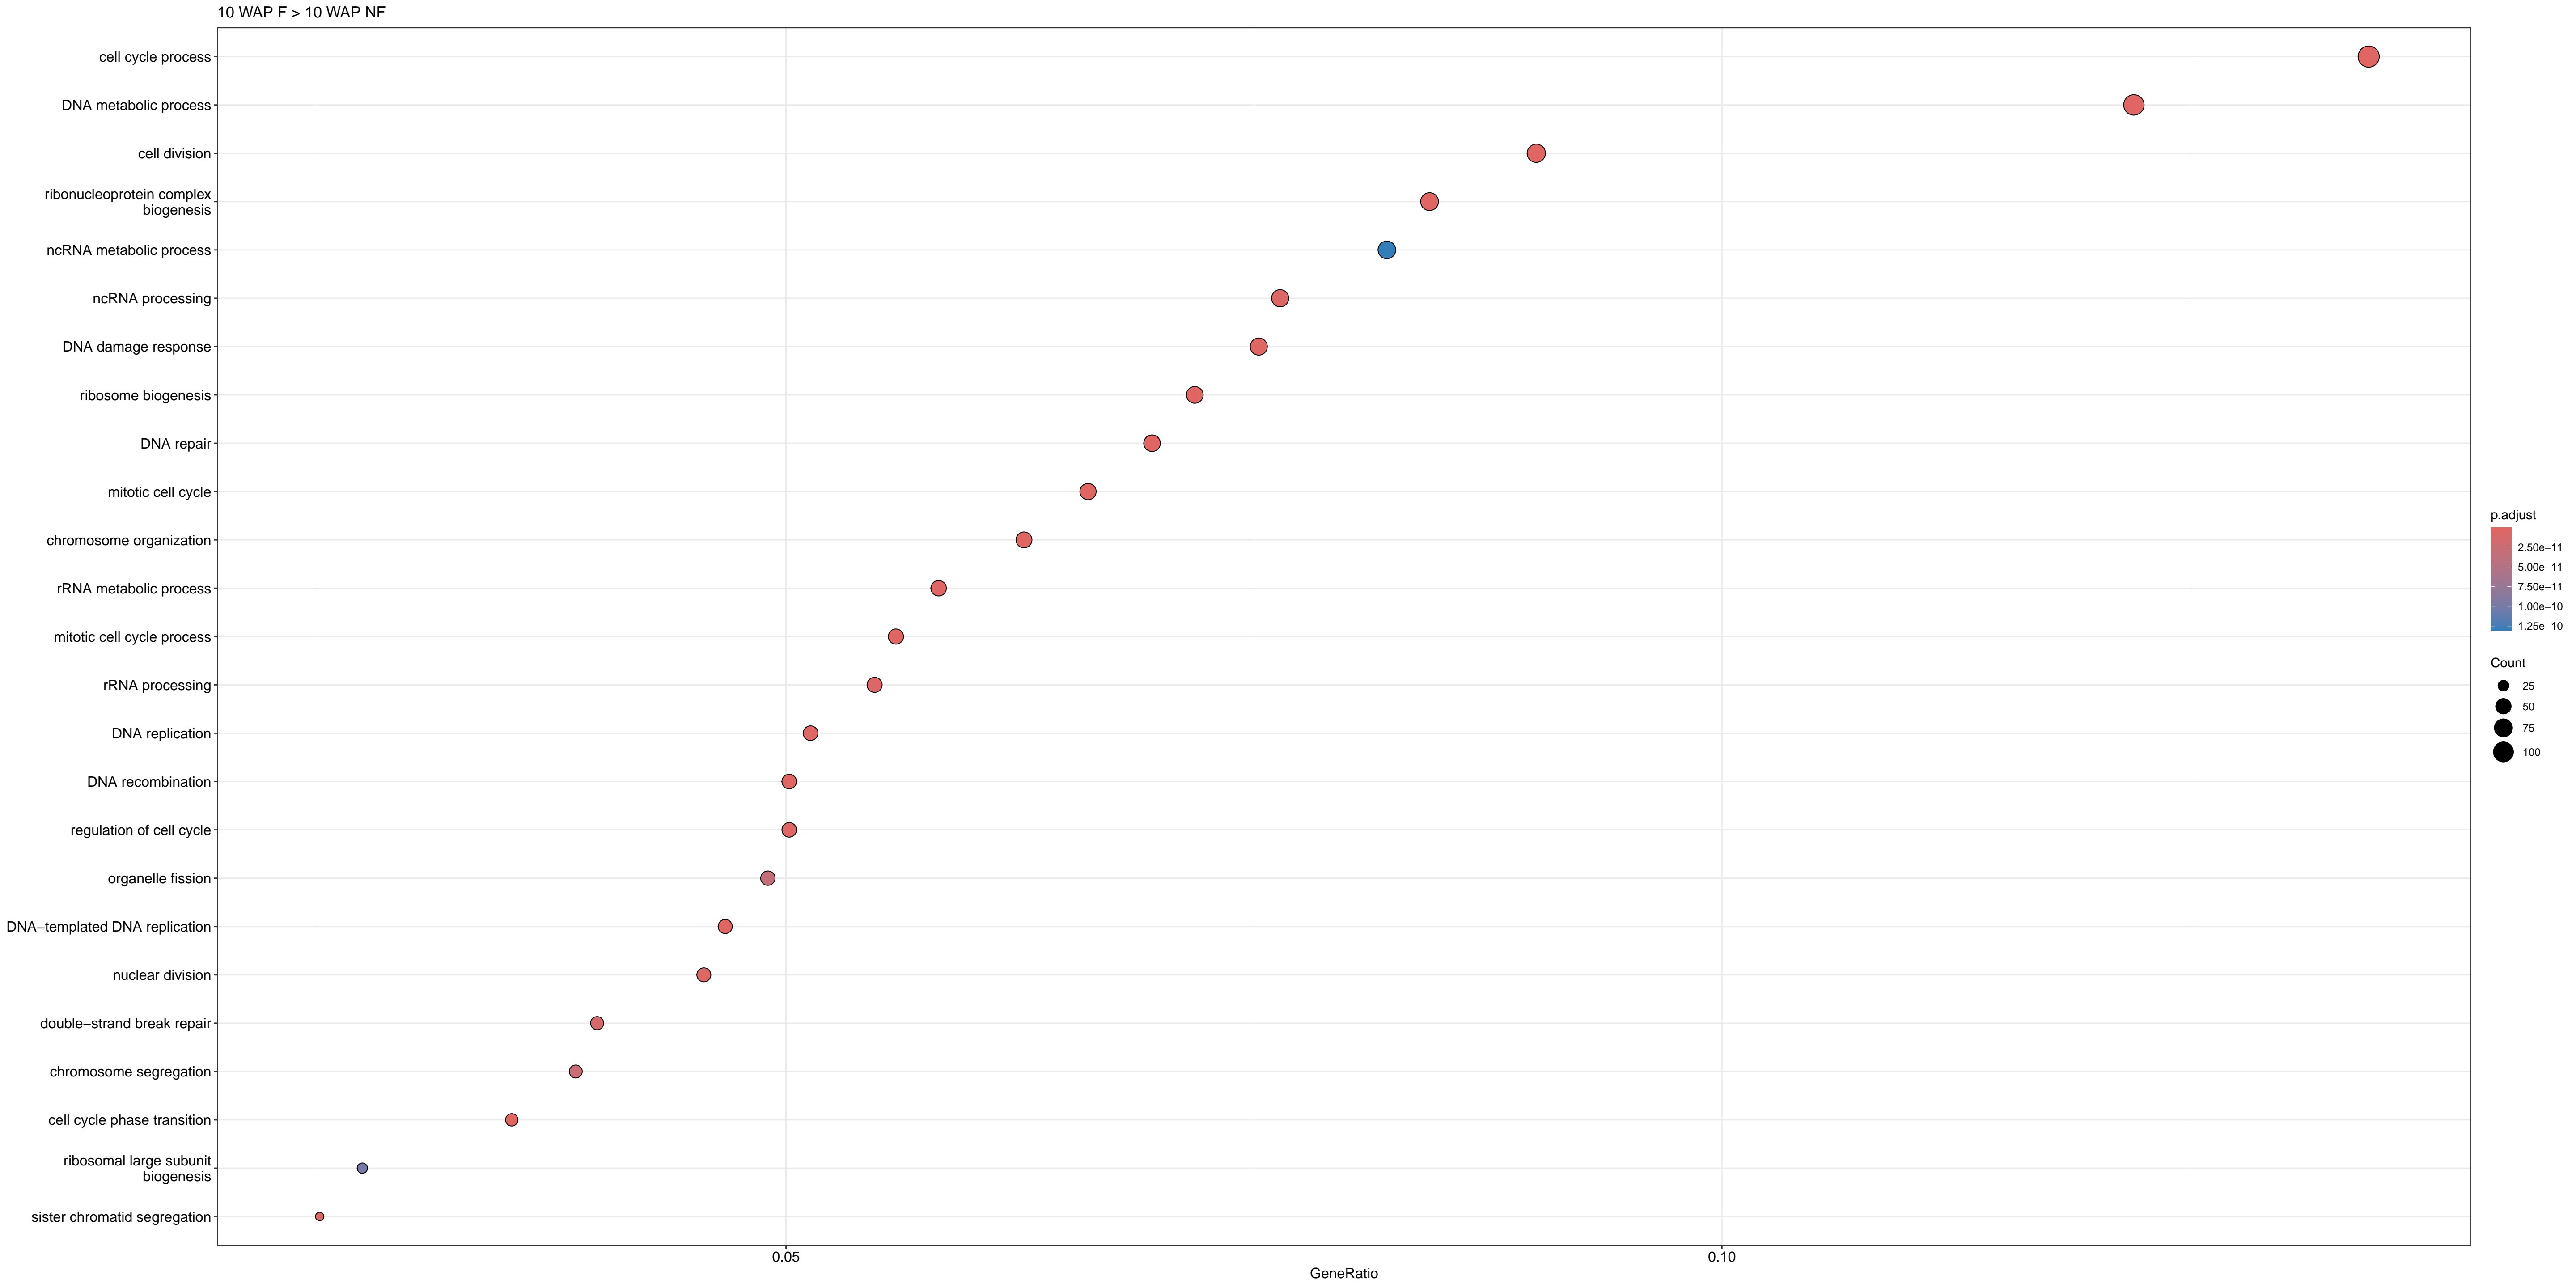

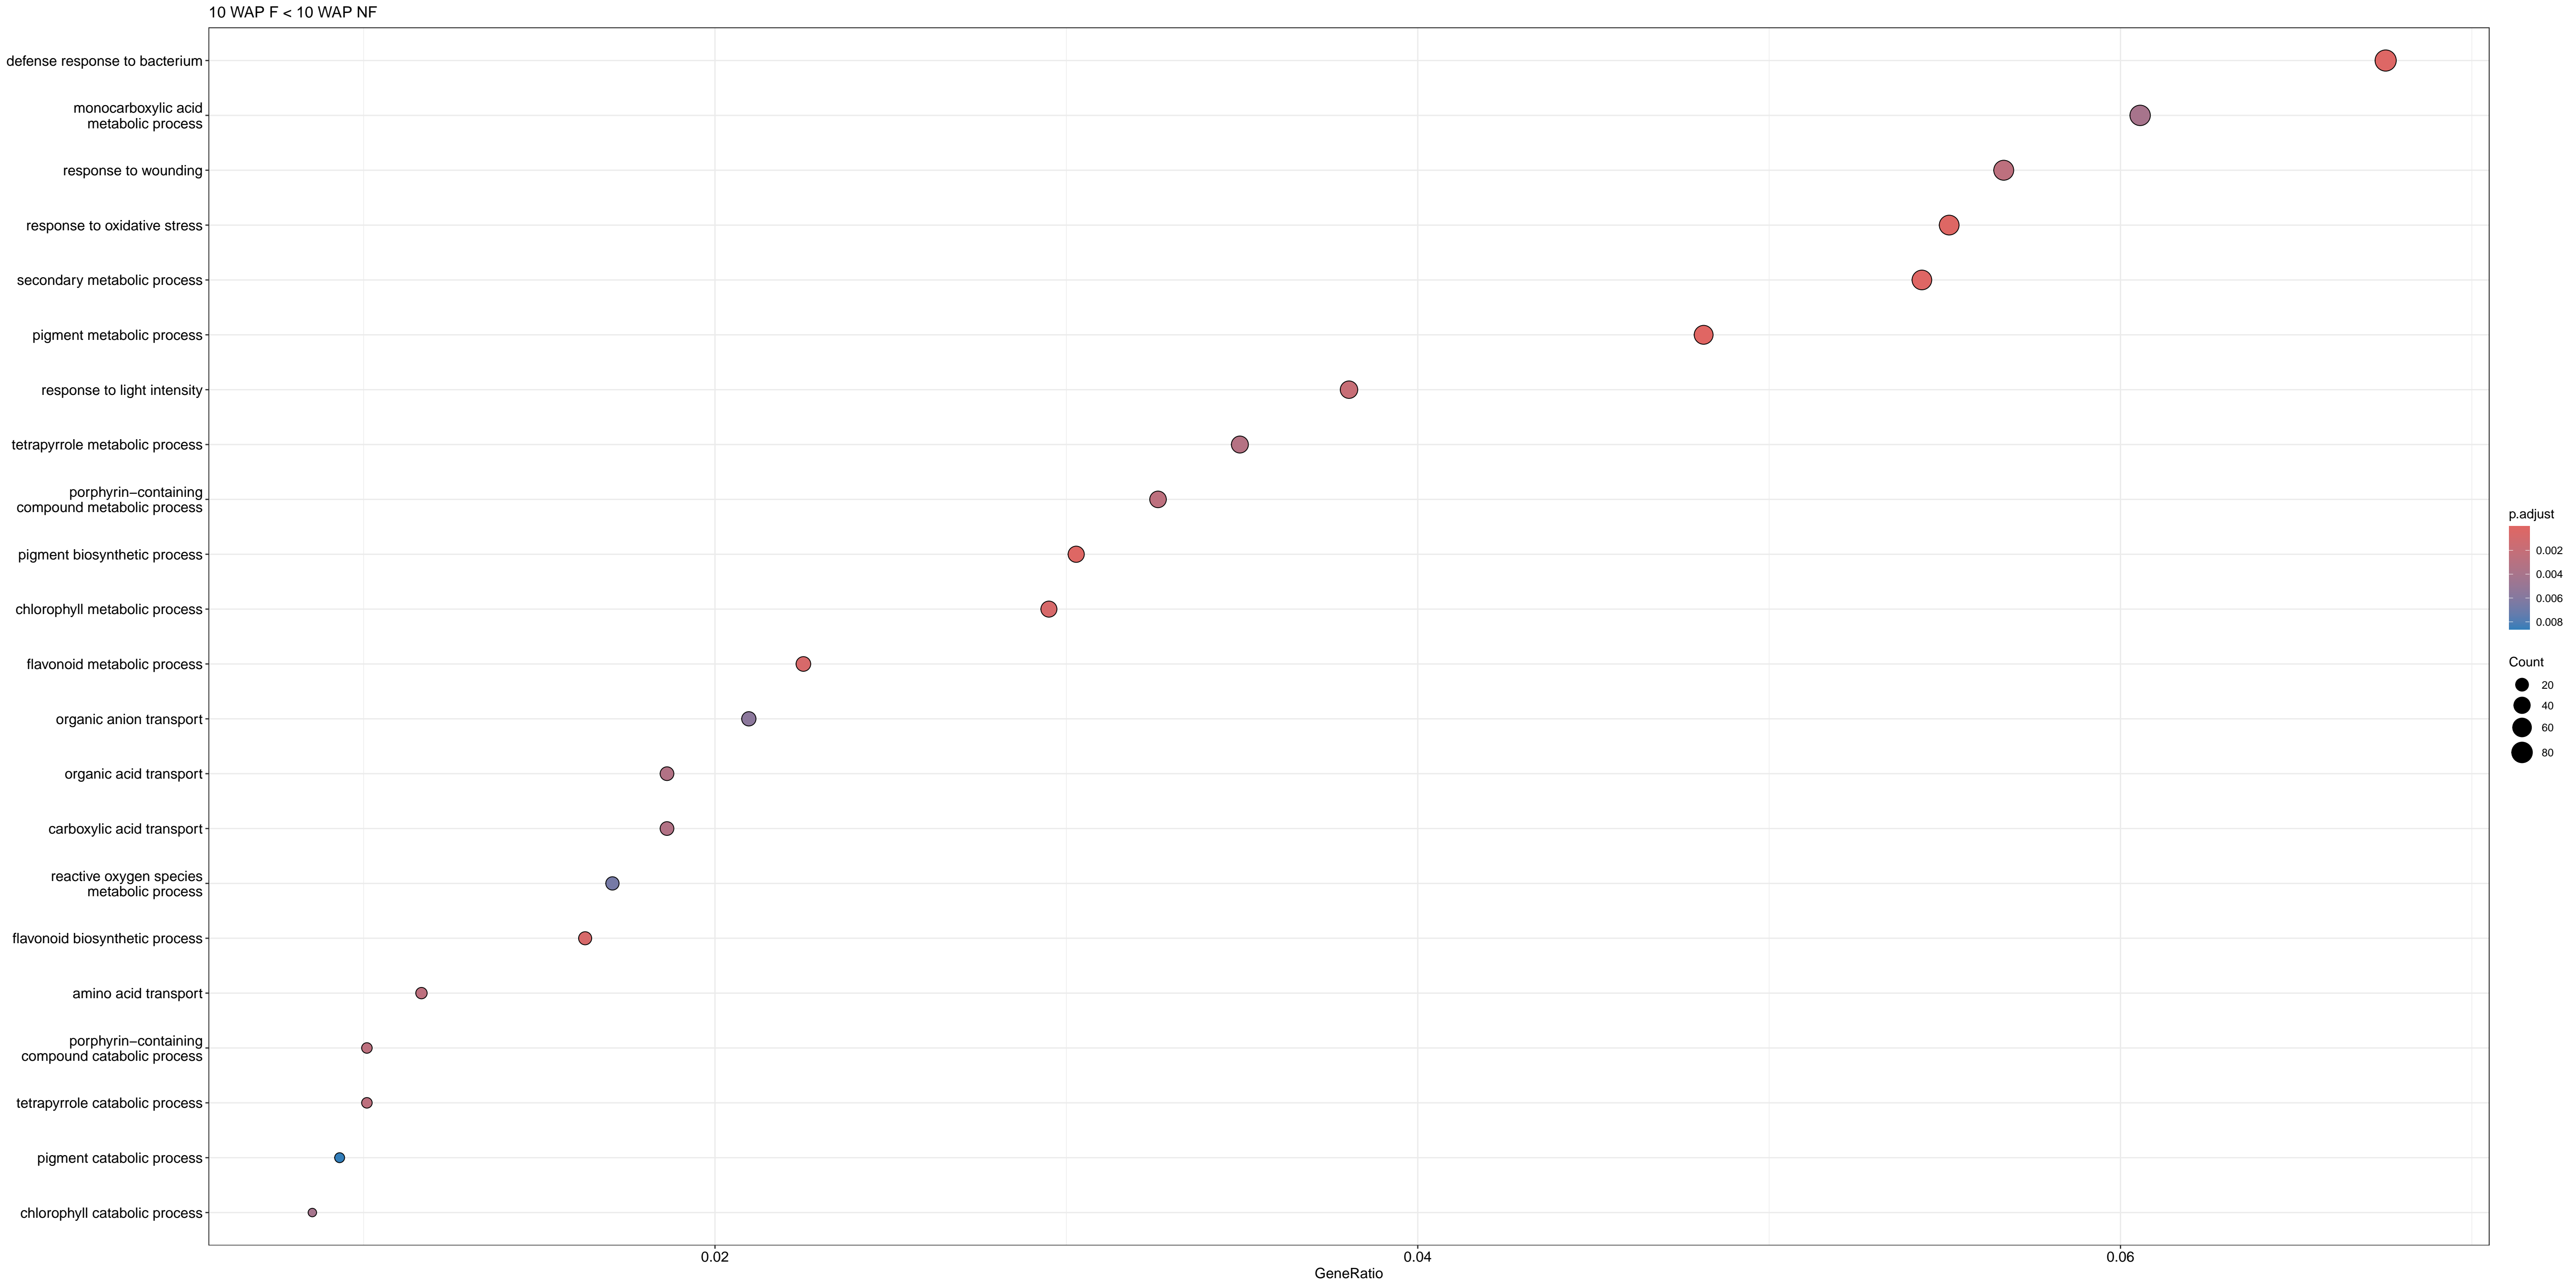

18 WAP F > 18 WAP NF

pollen exine formation

pollen wall assembly

cellular component assembly  
involved in morphogenesis

cellular component  
morphogenesis

0.06

0.08

GeneRatio

0.10

0.12

0.14

p.adjust

0.006560046

Count

3

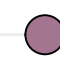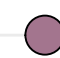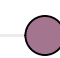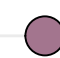

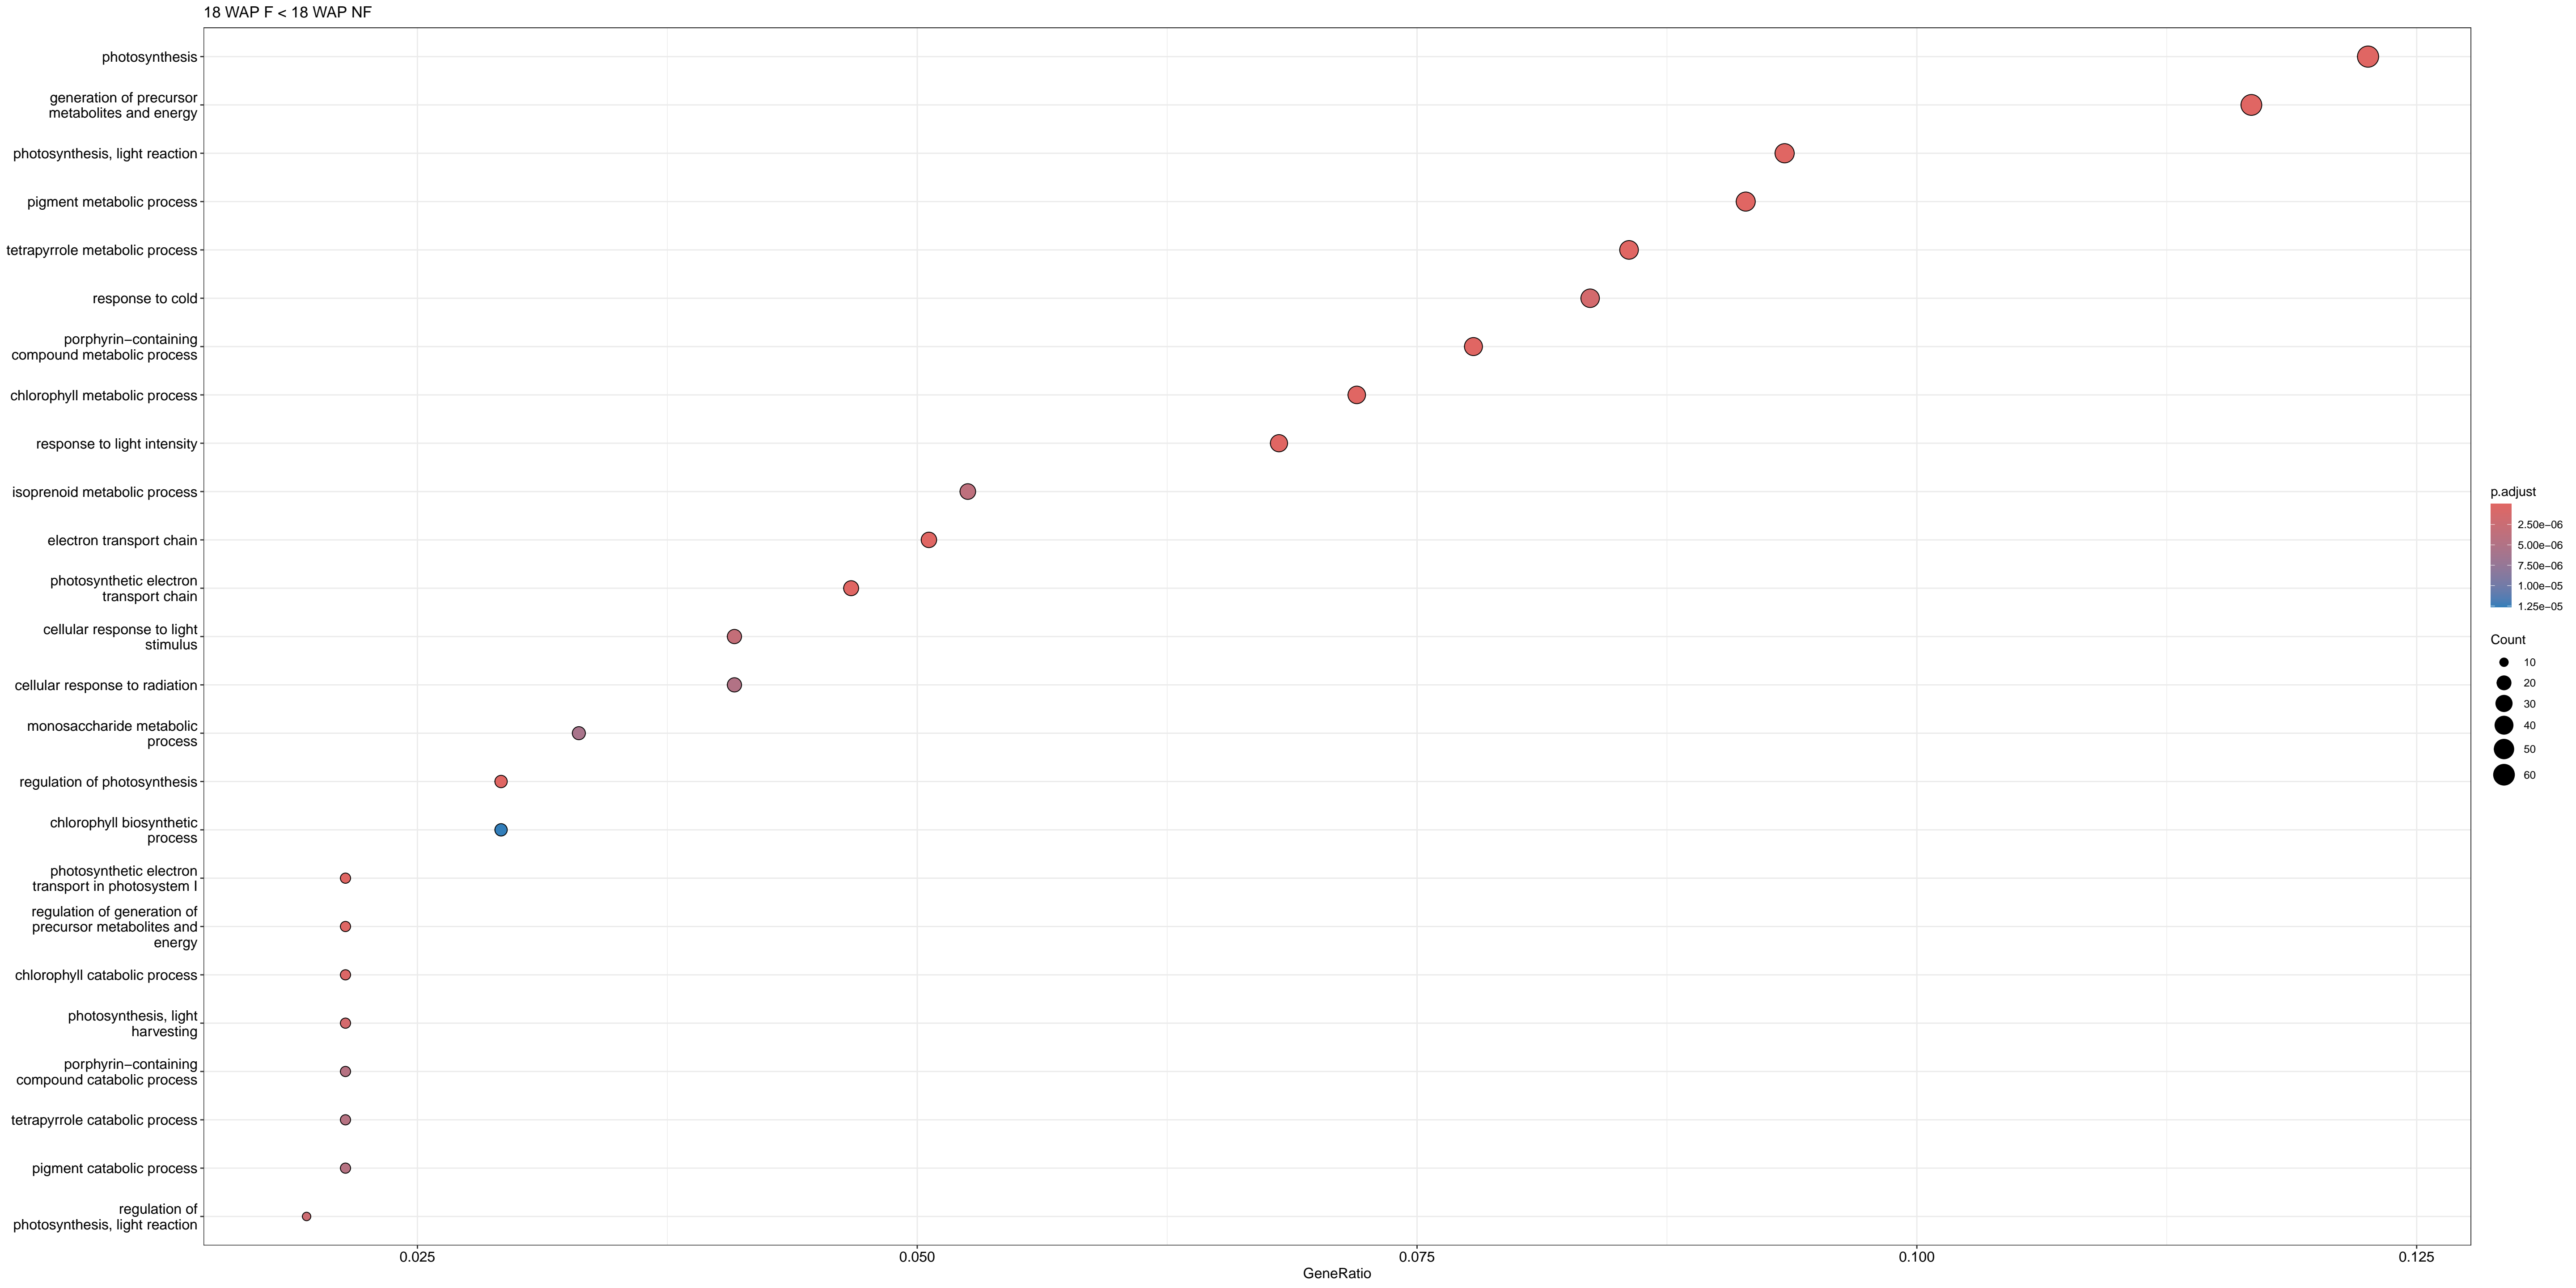

22 WAP F < 22 WAP NF

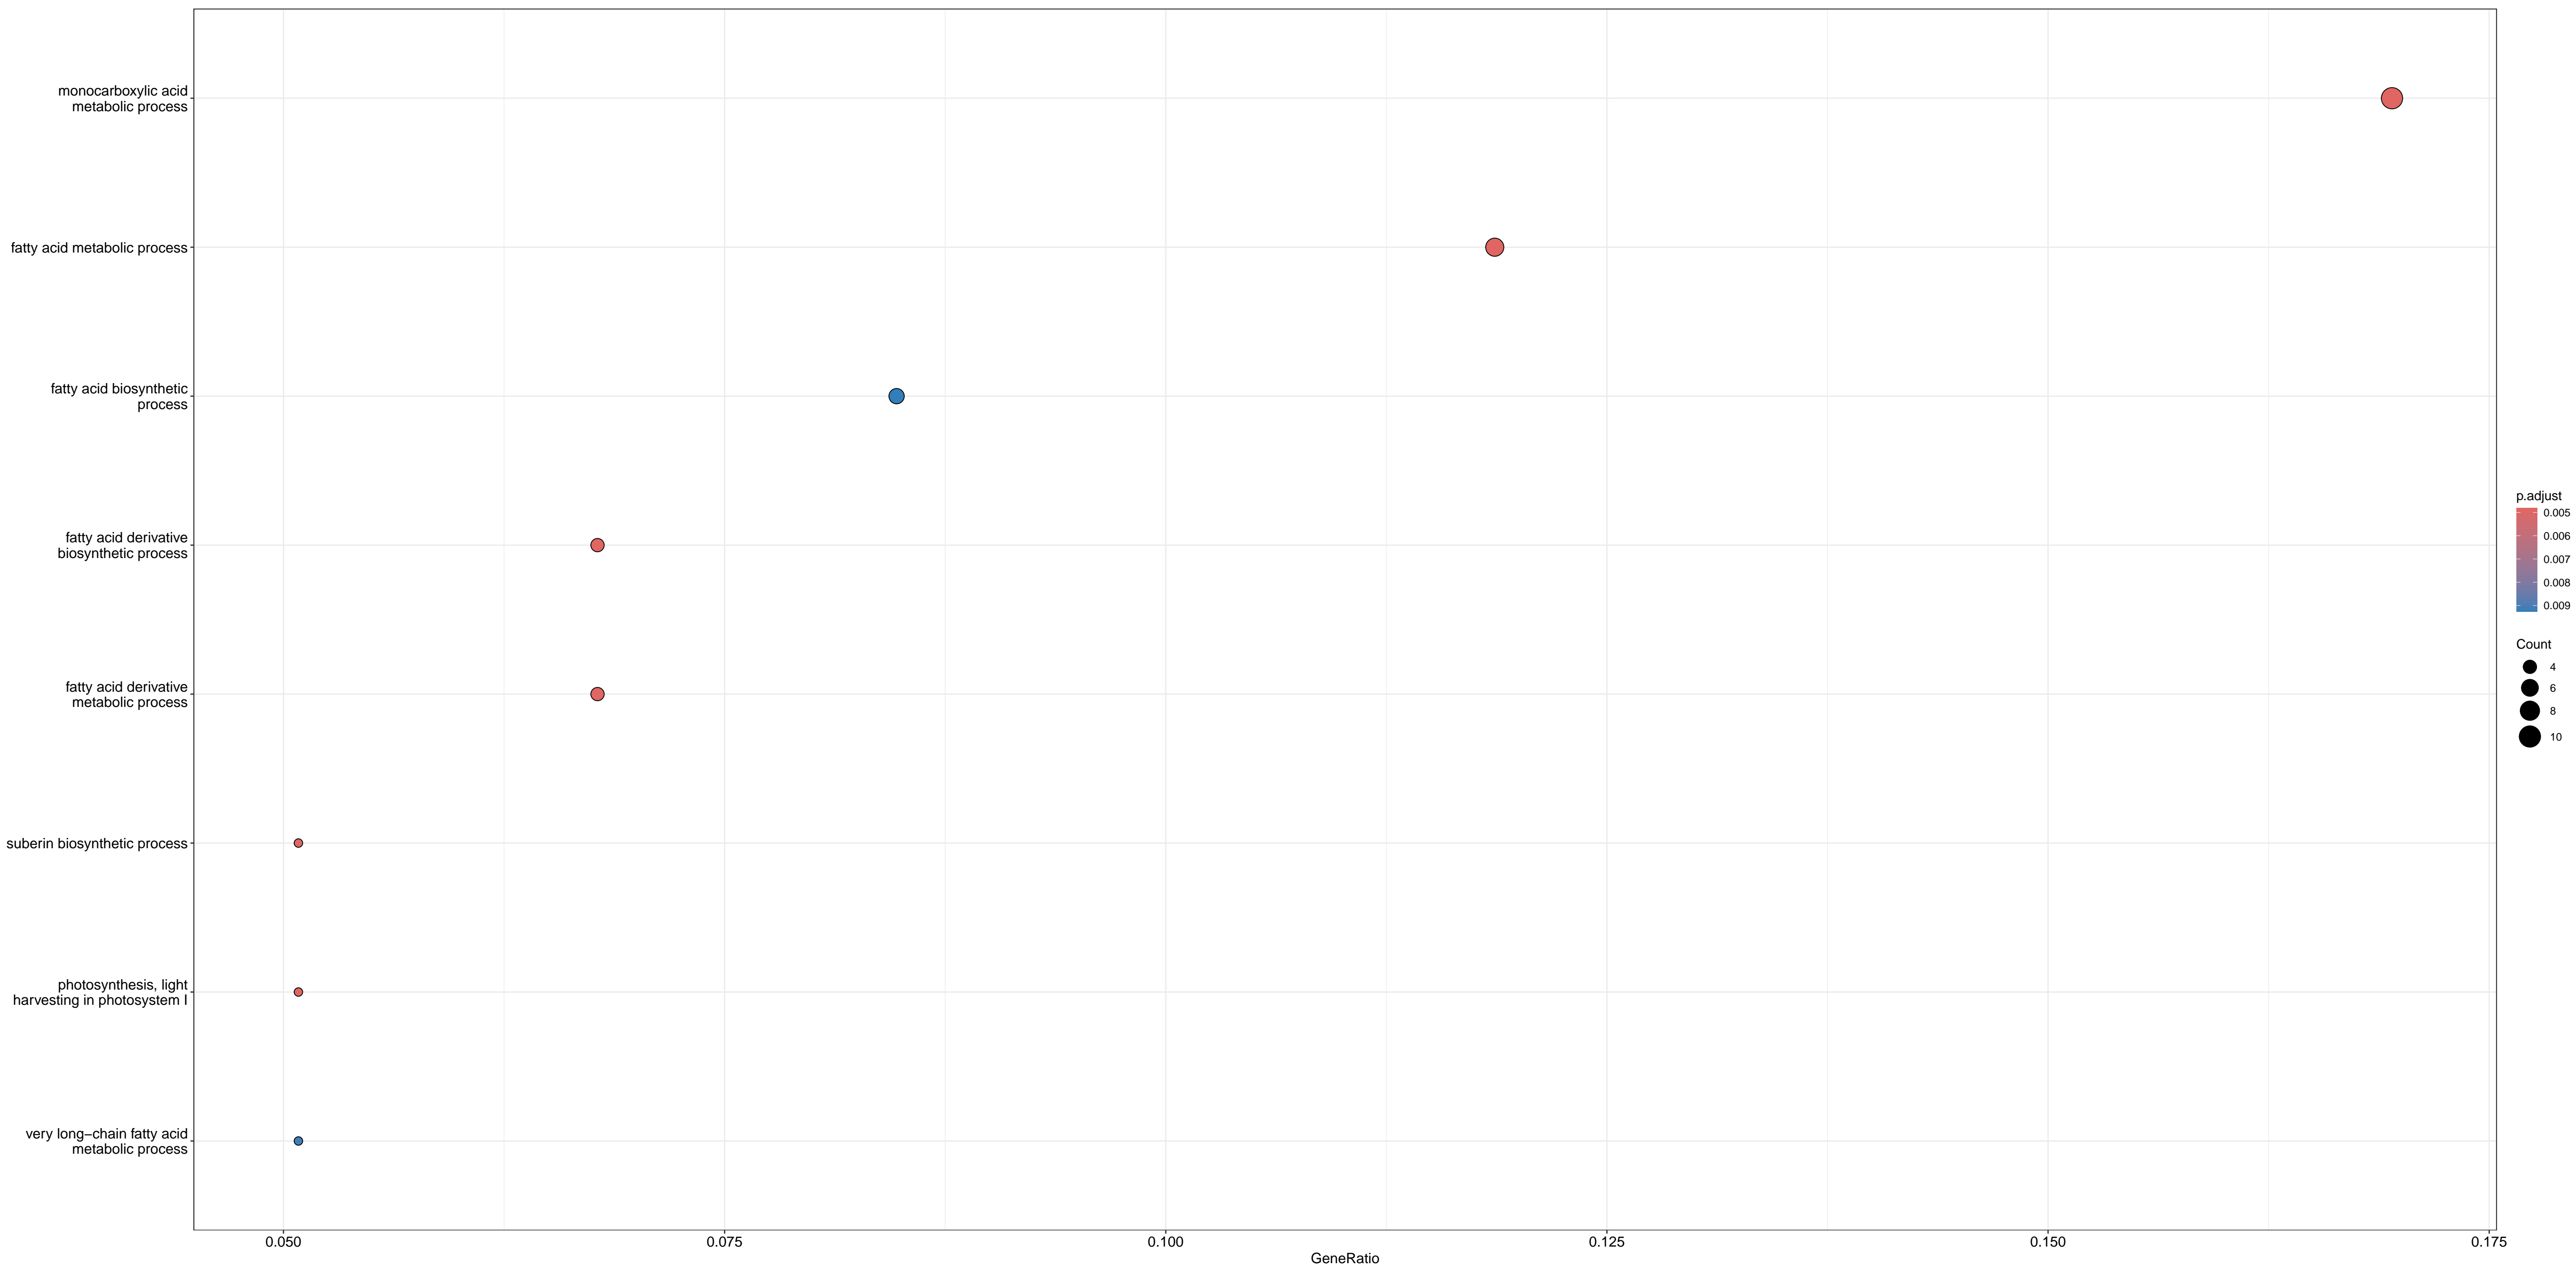

24 WAP F < 24 WAP NF

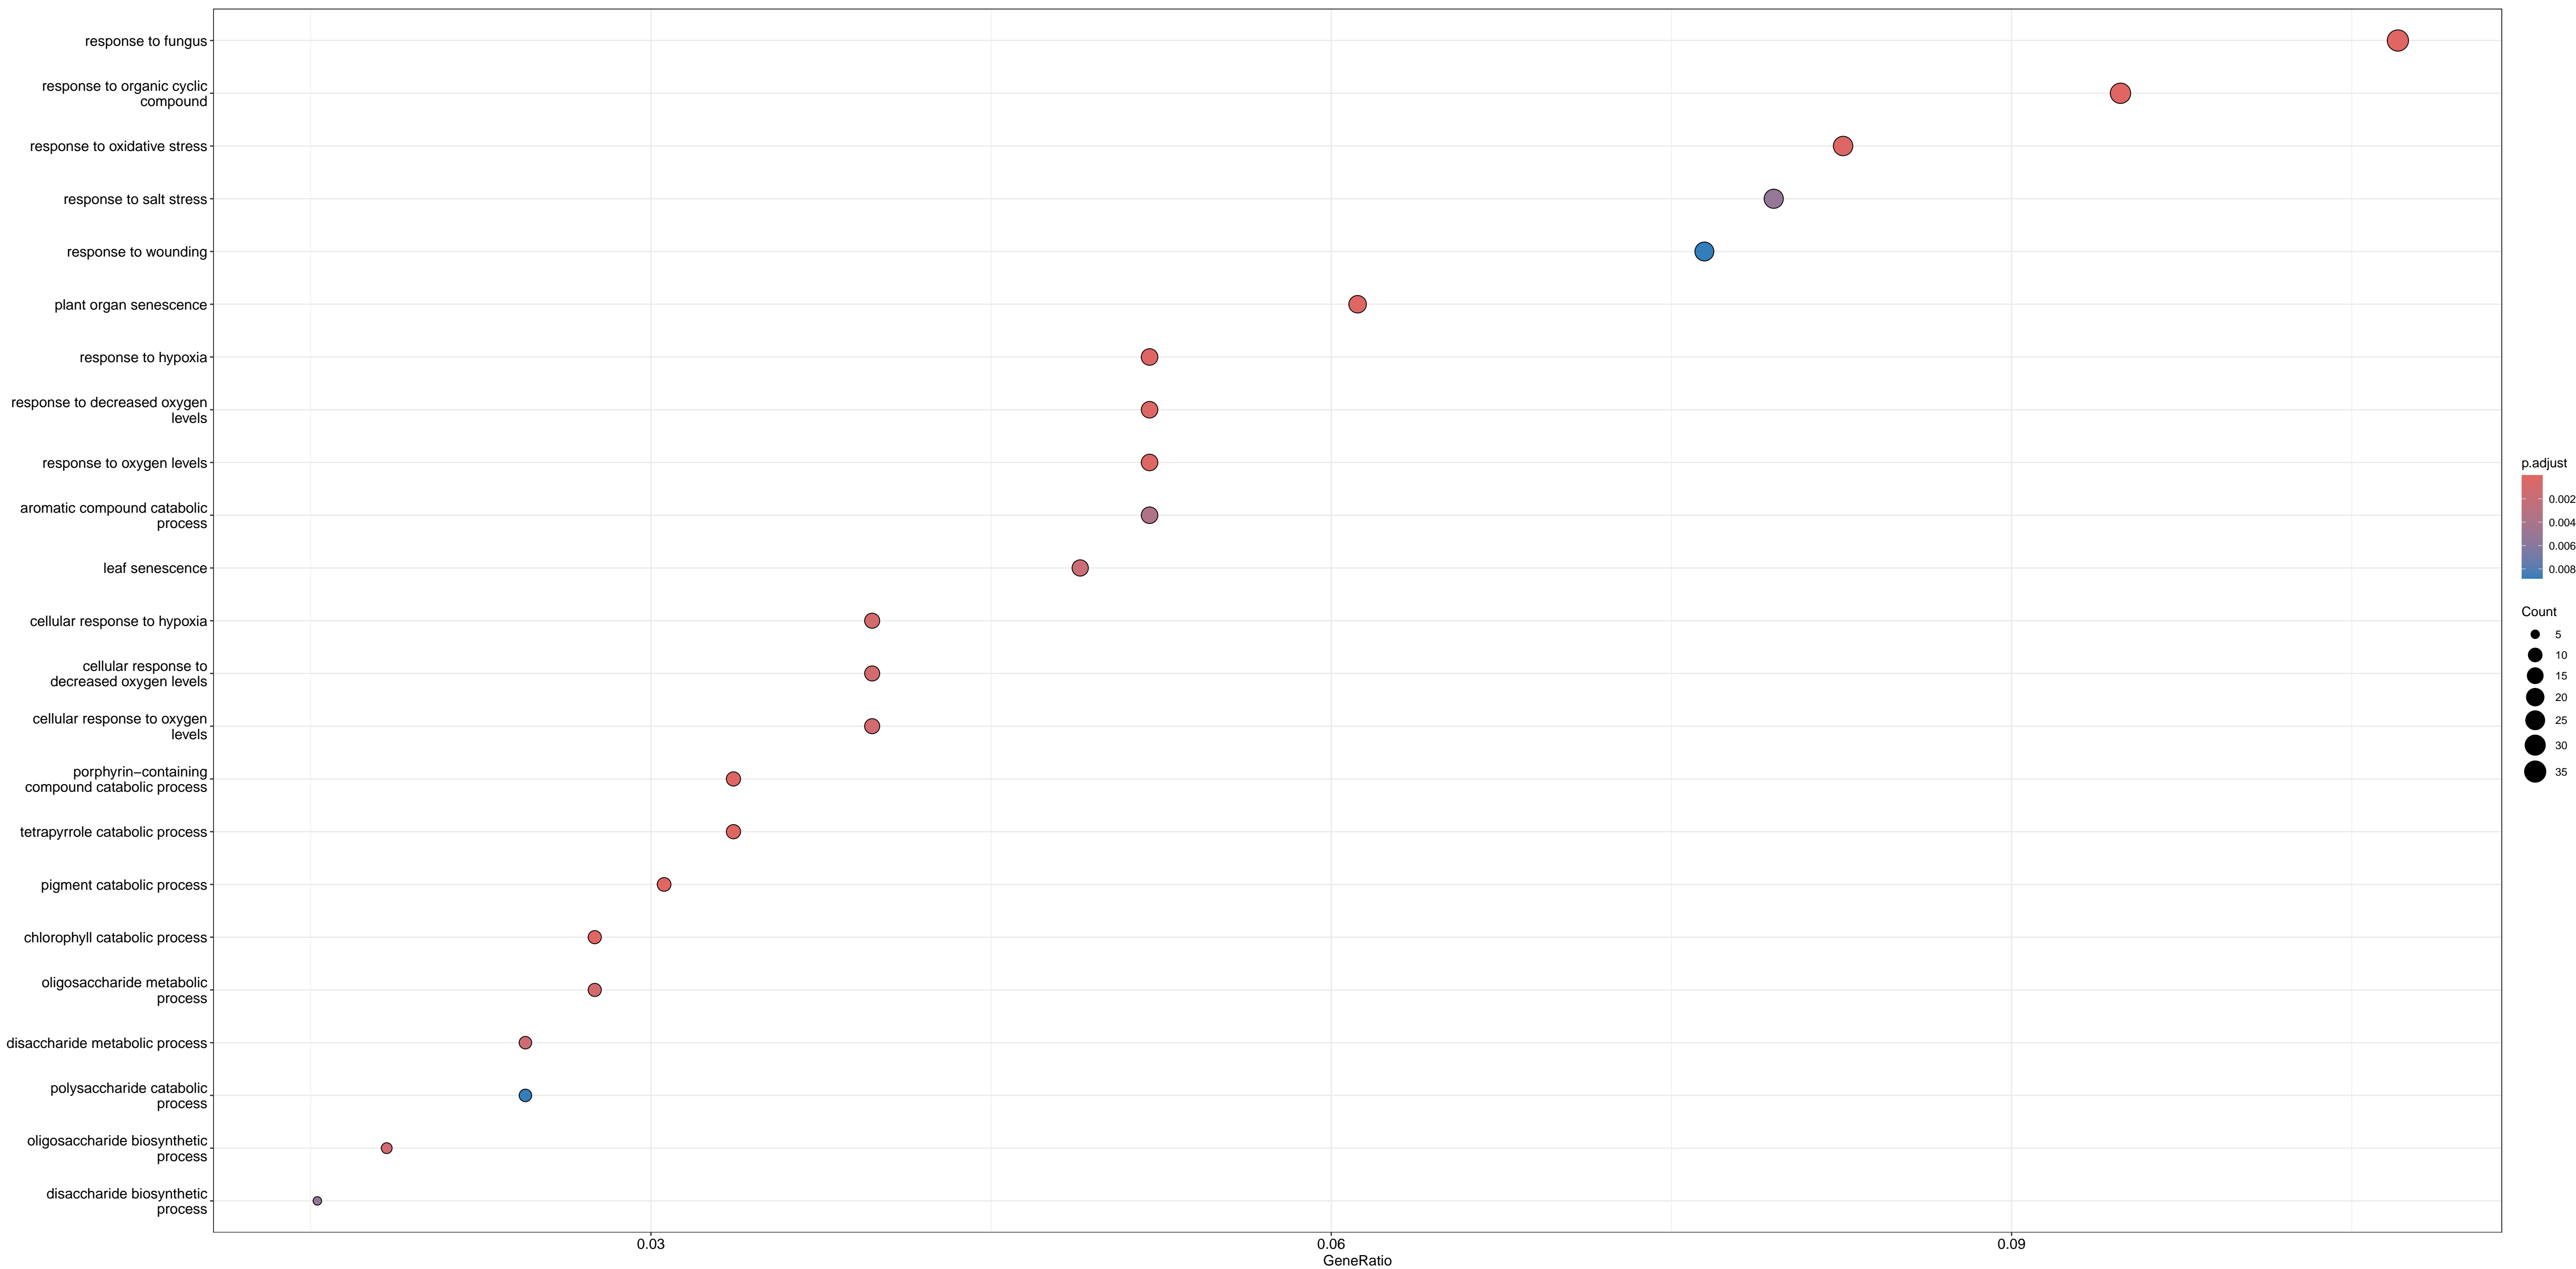

32 WAP F > 32 WAP NF

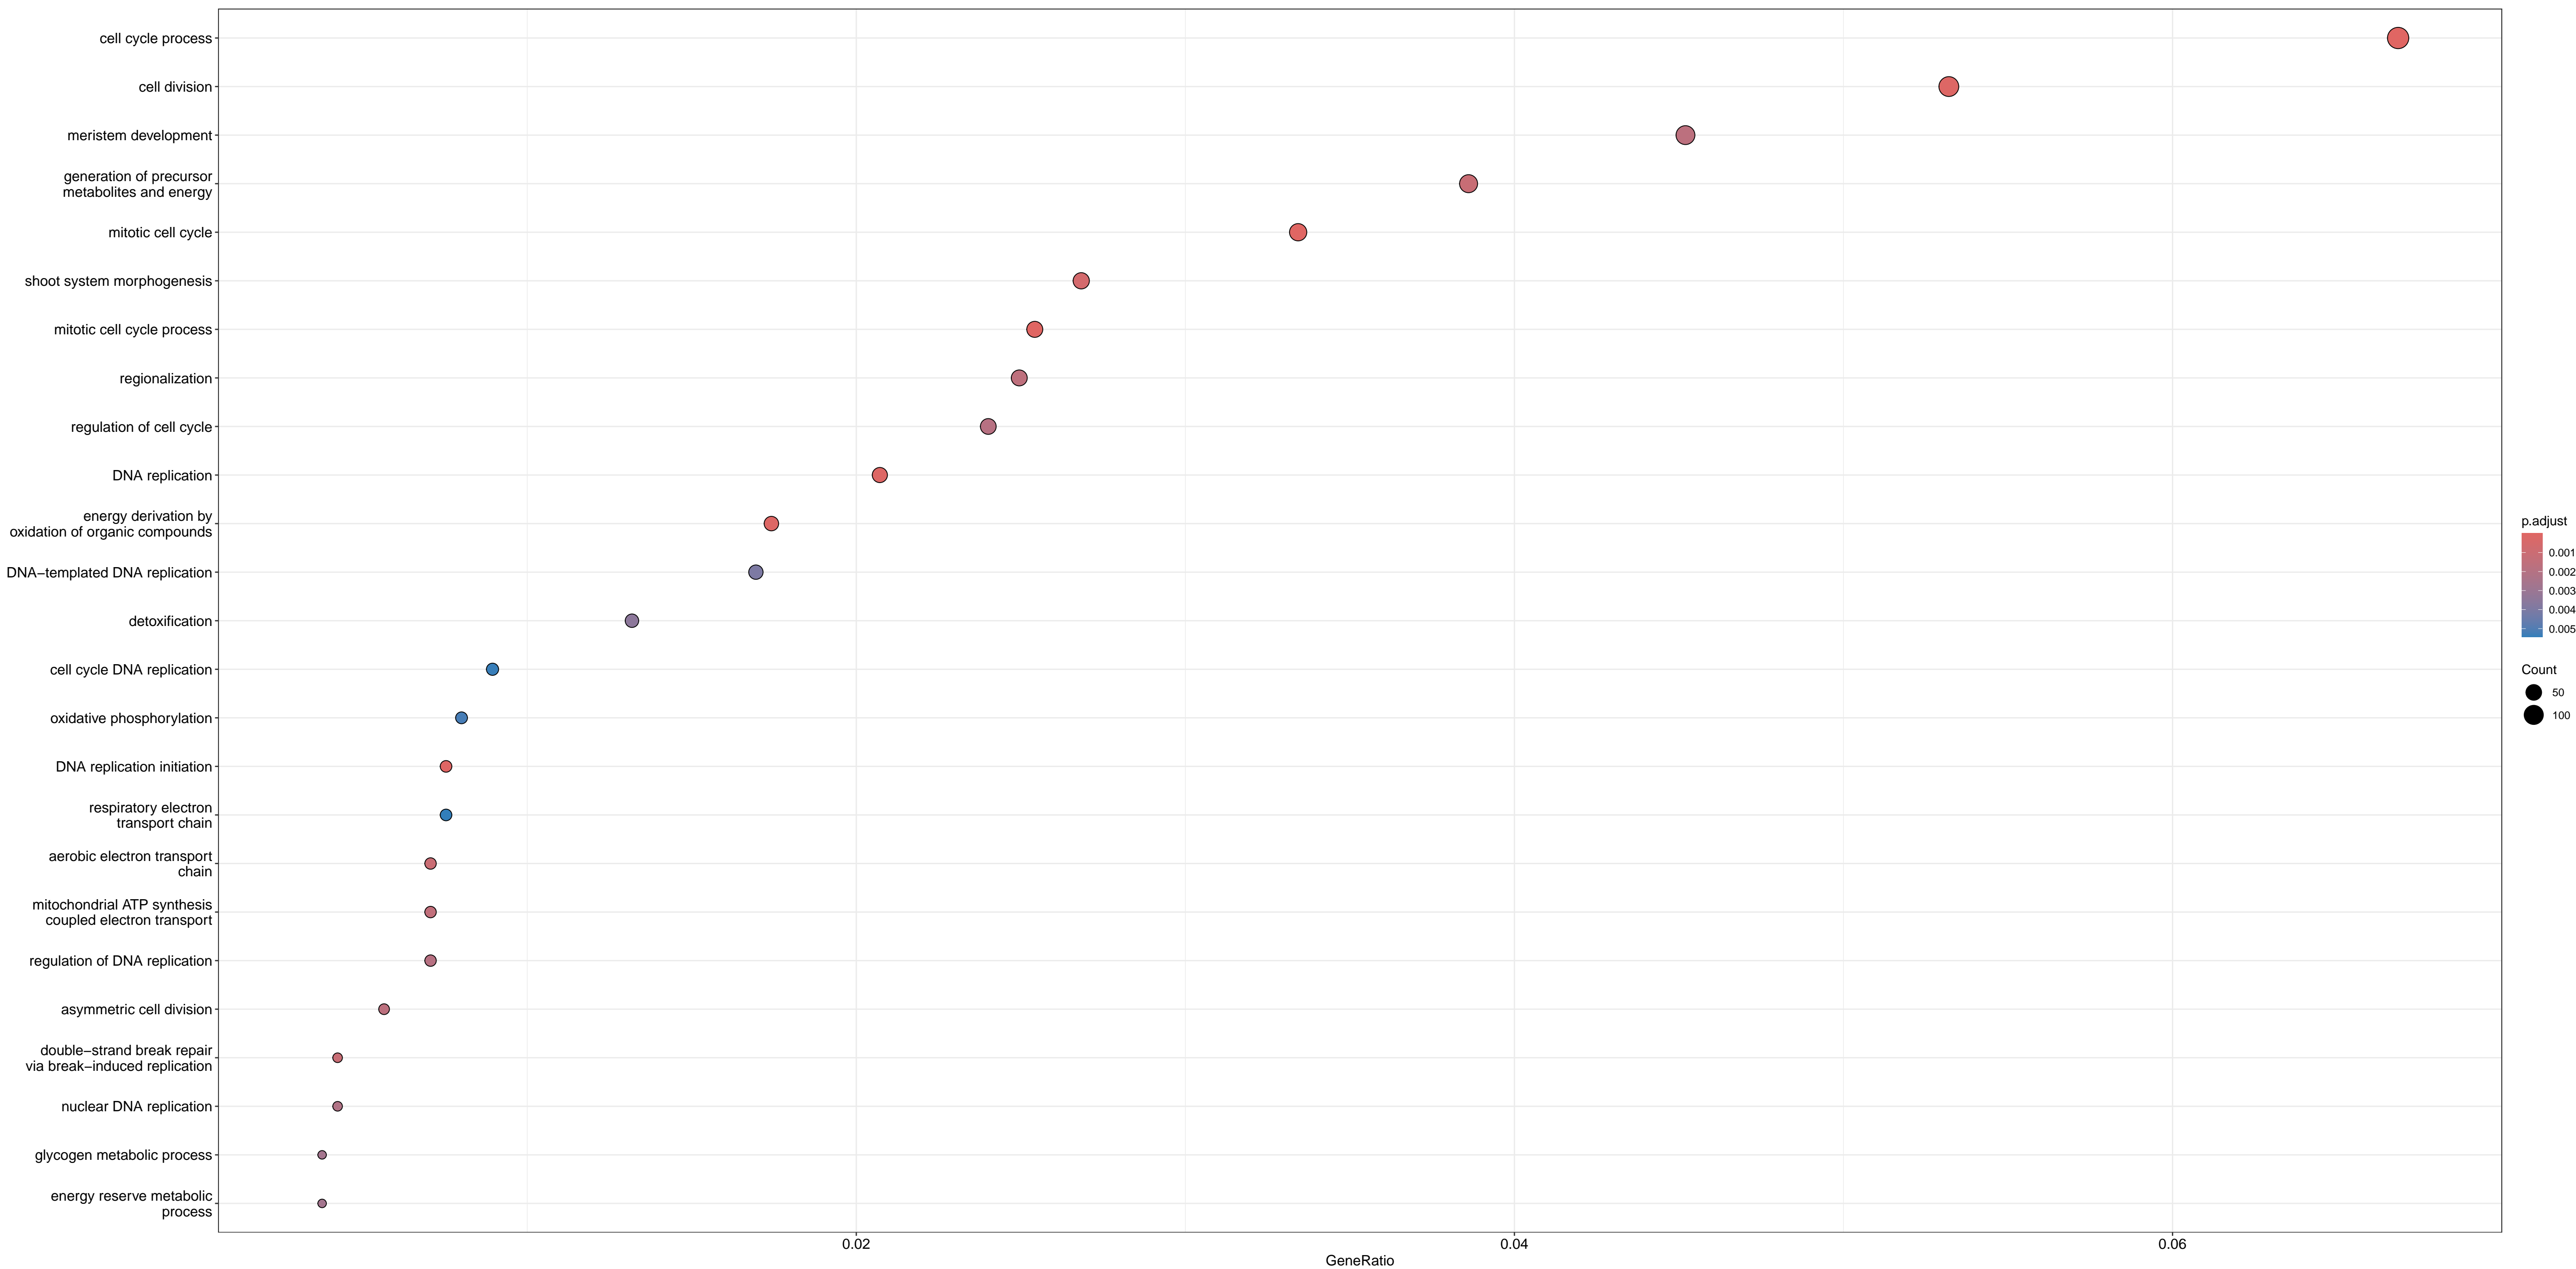

32 WAP F < 32 WAP NF

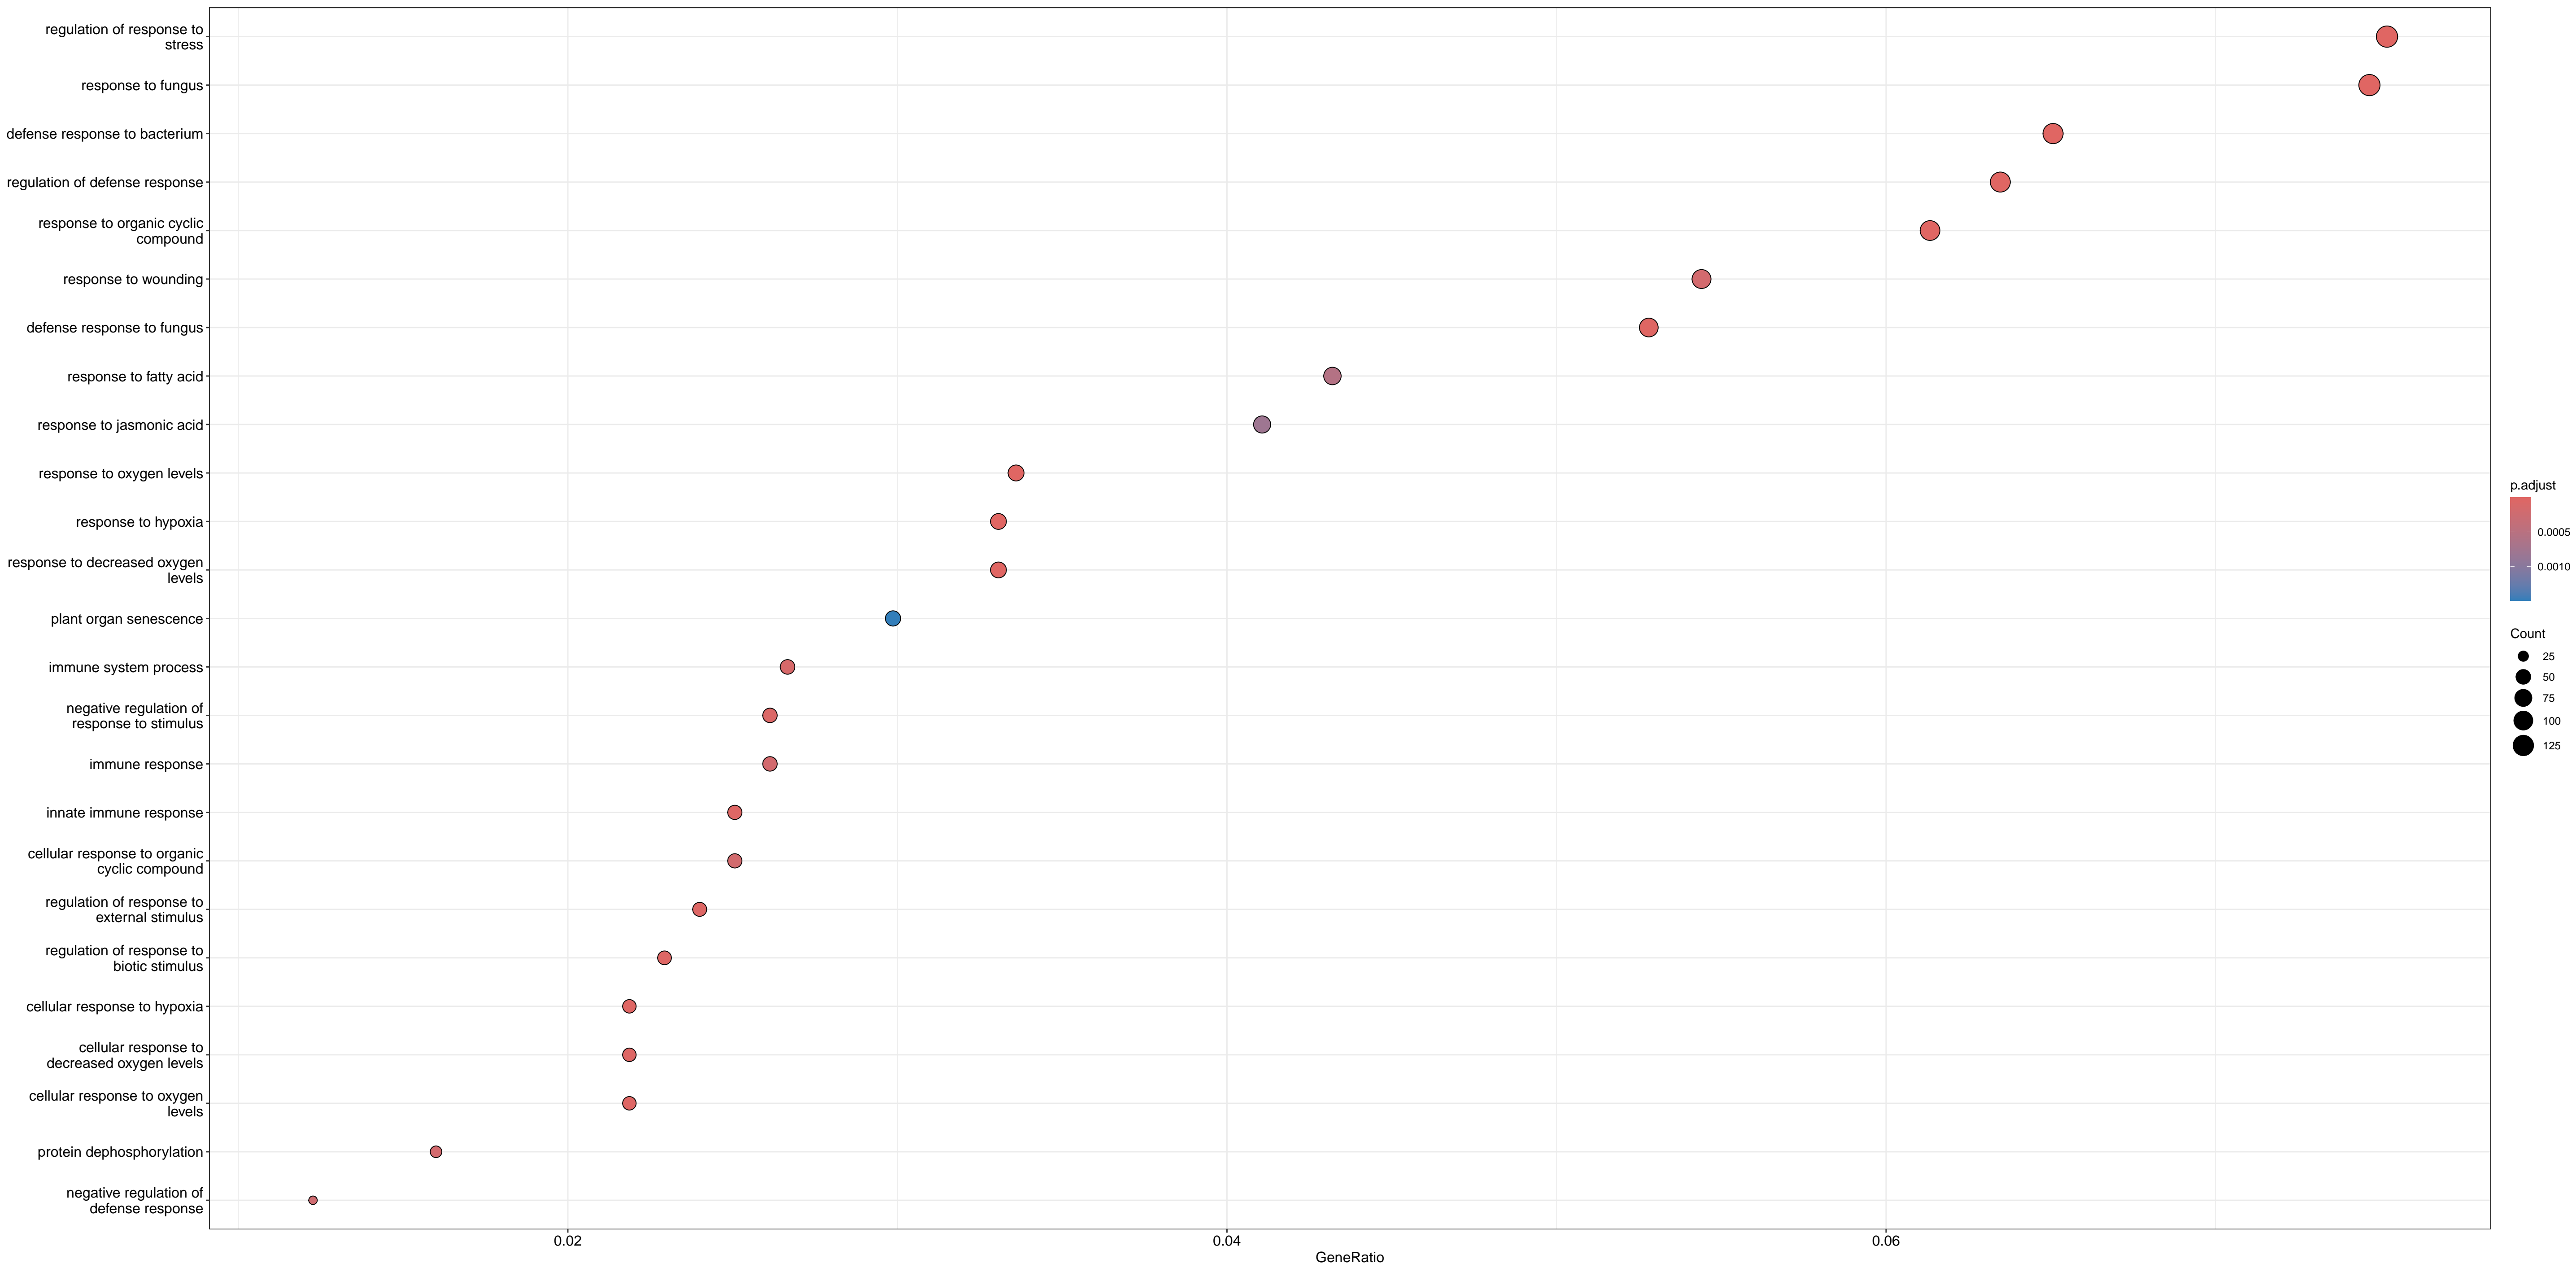



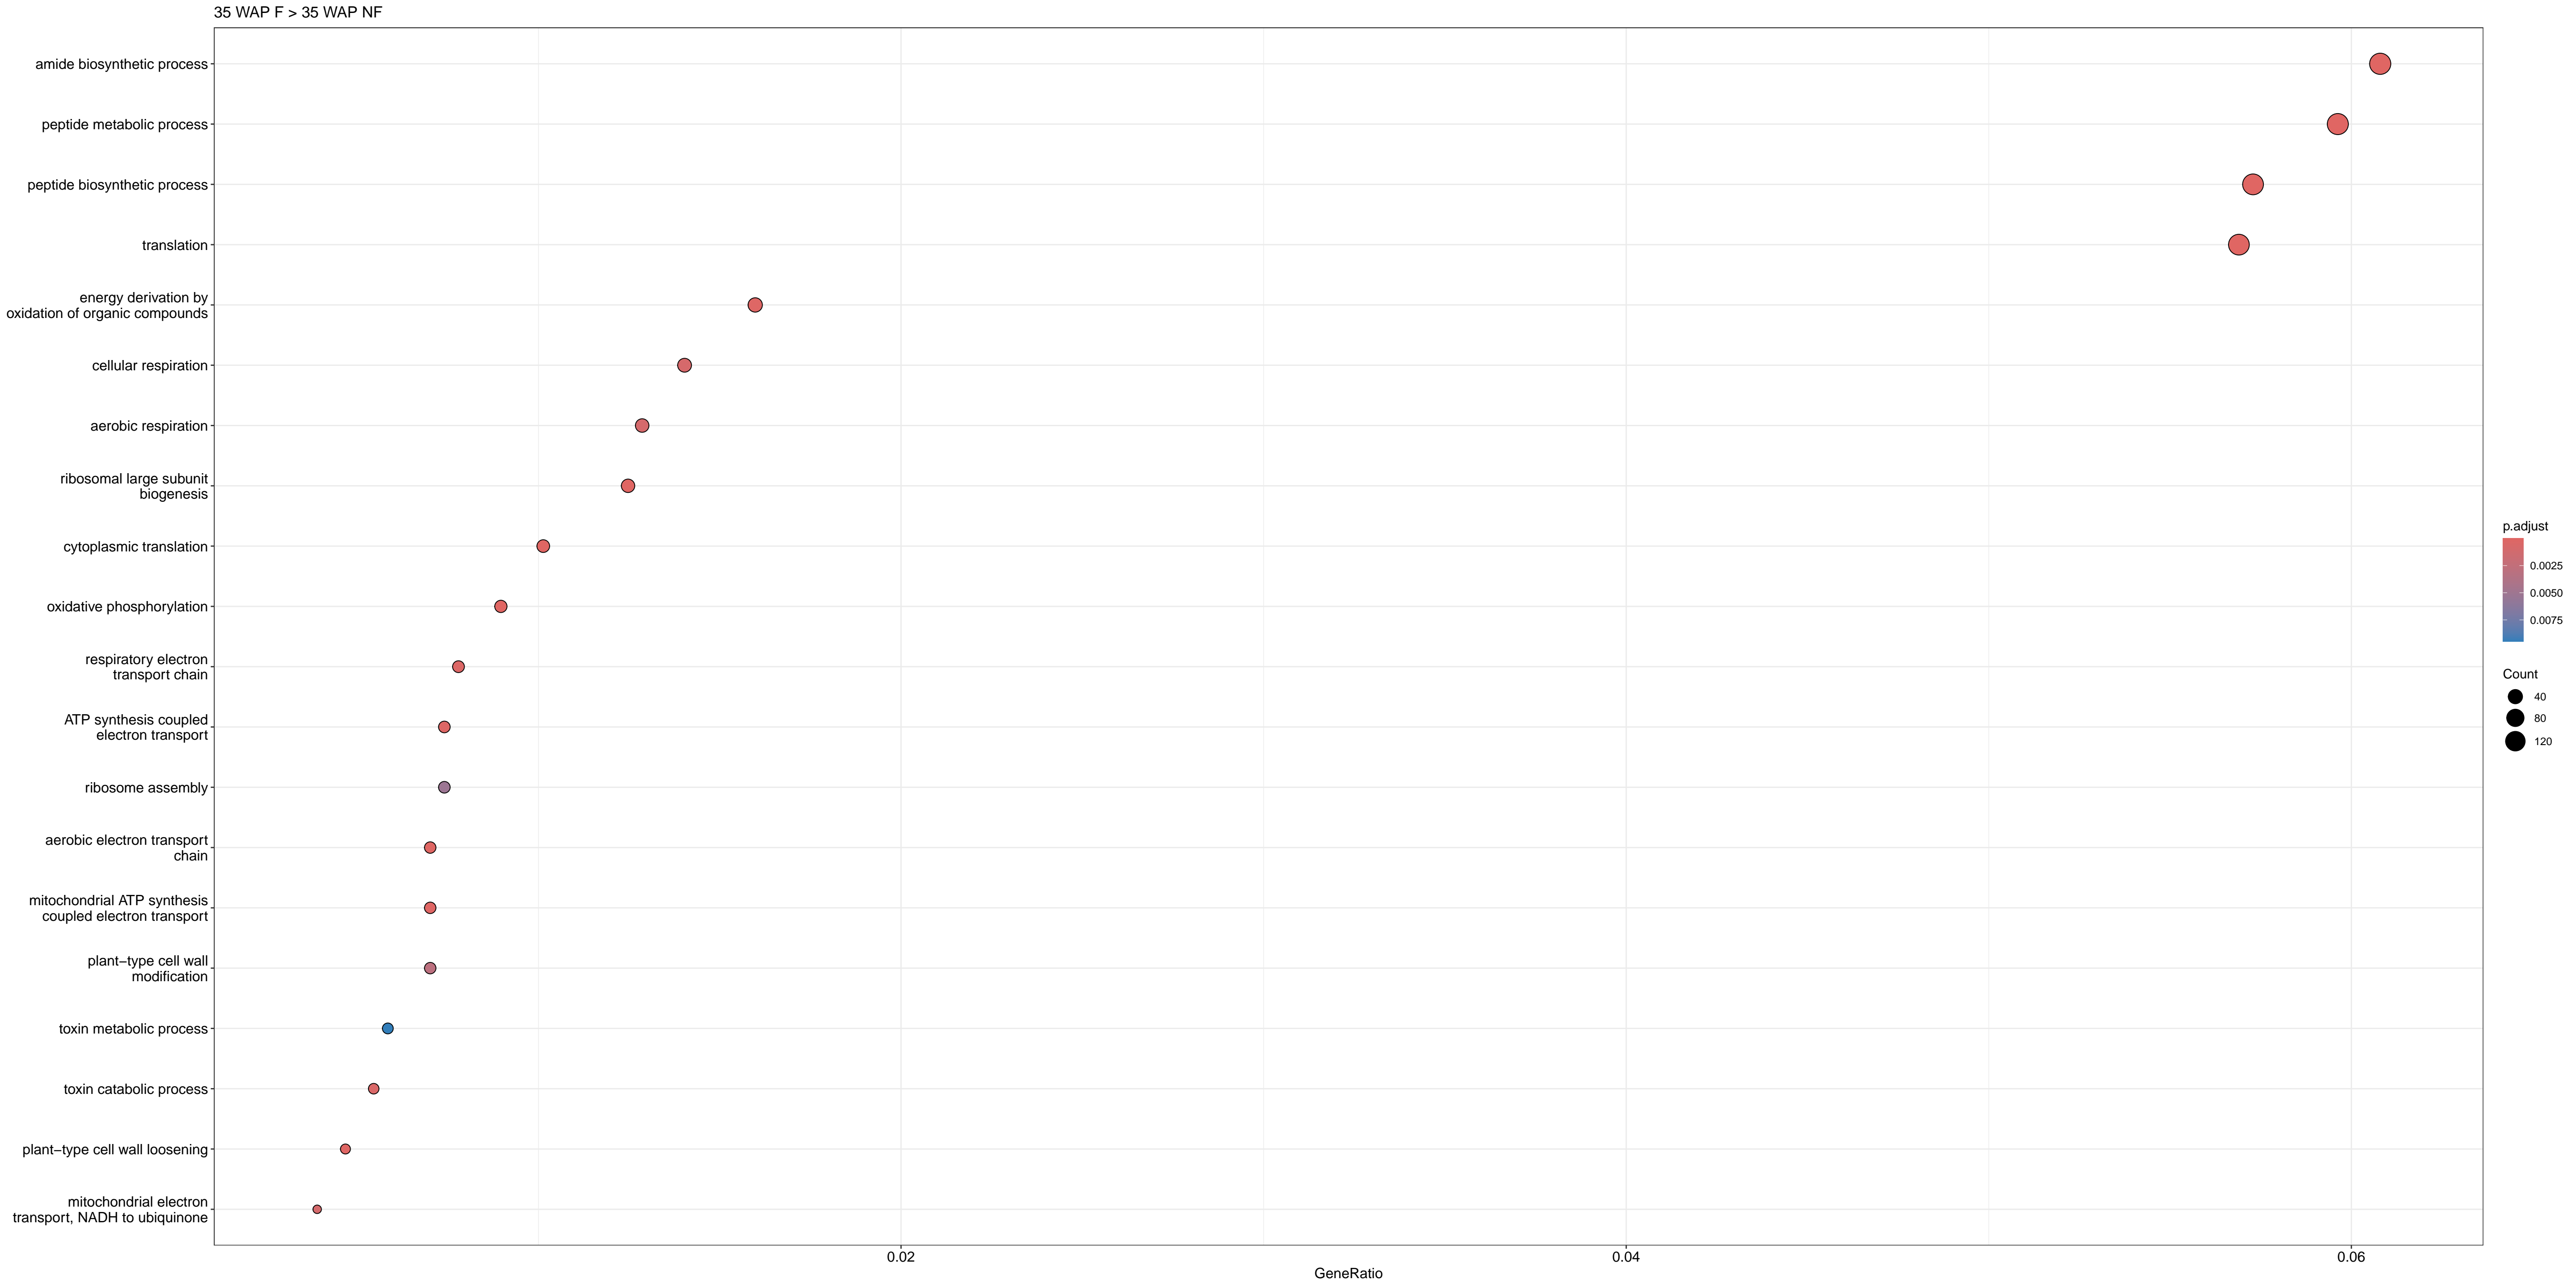

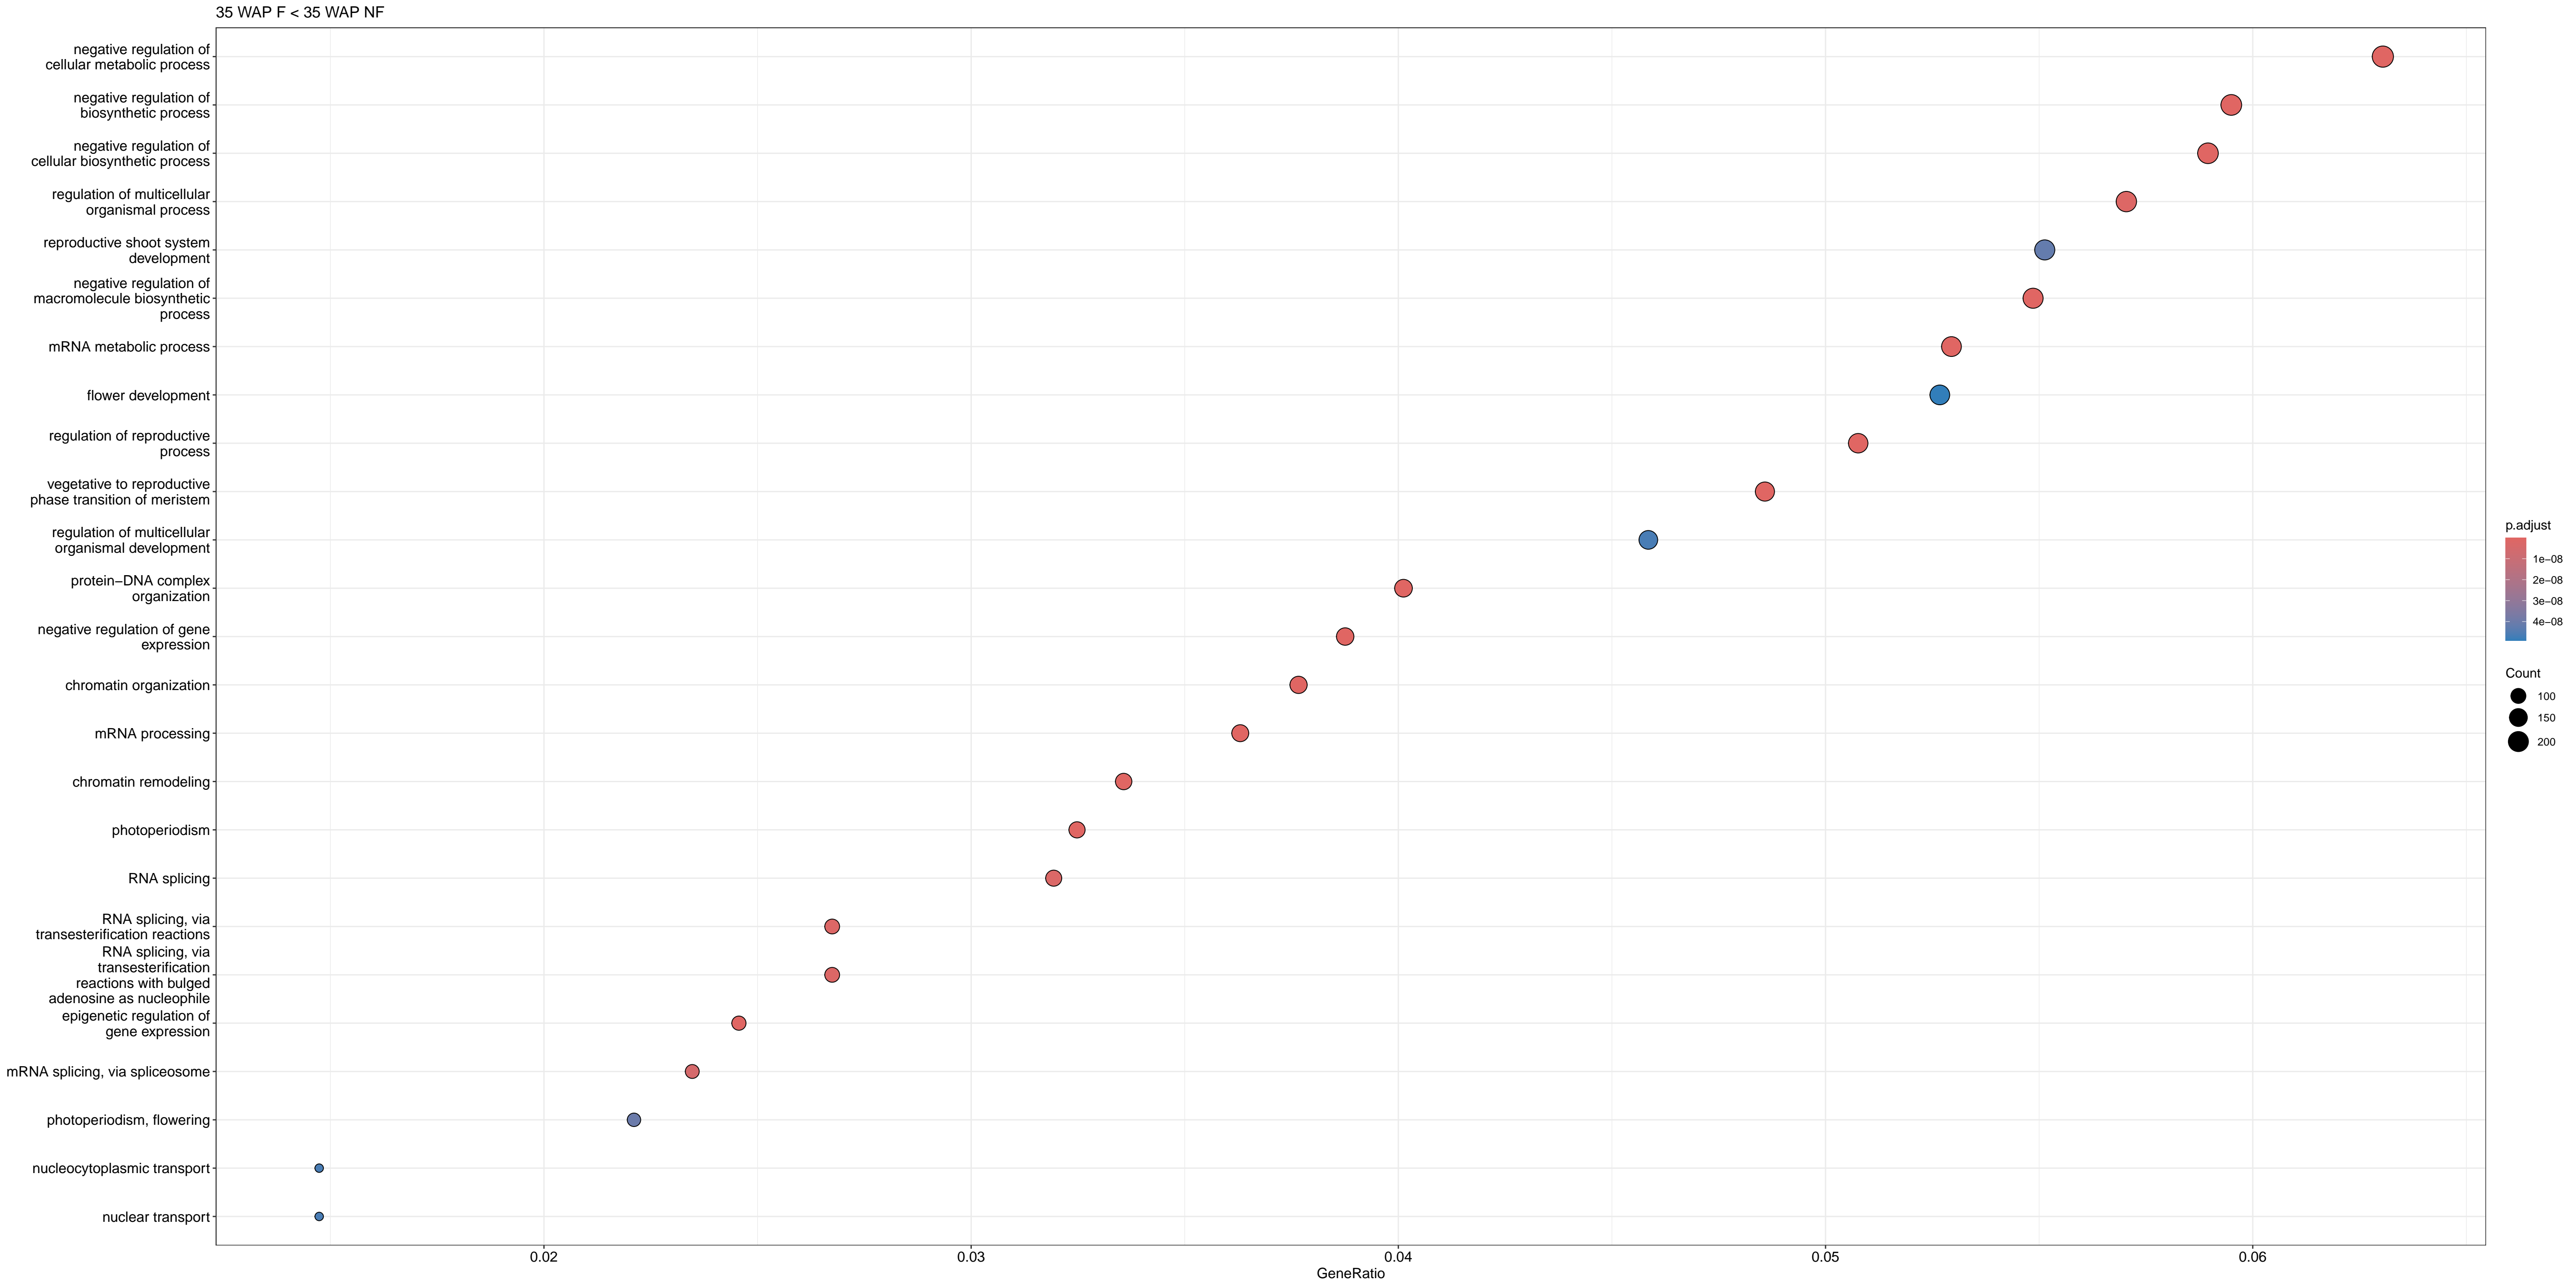

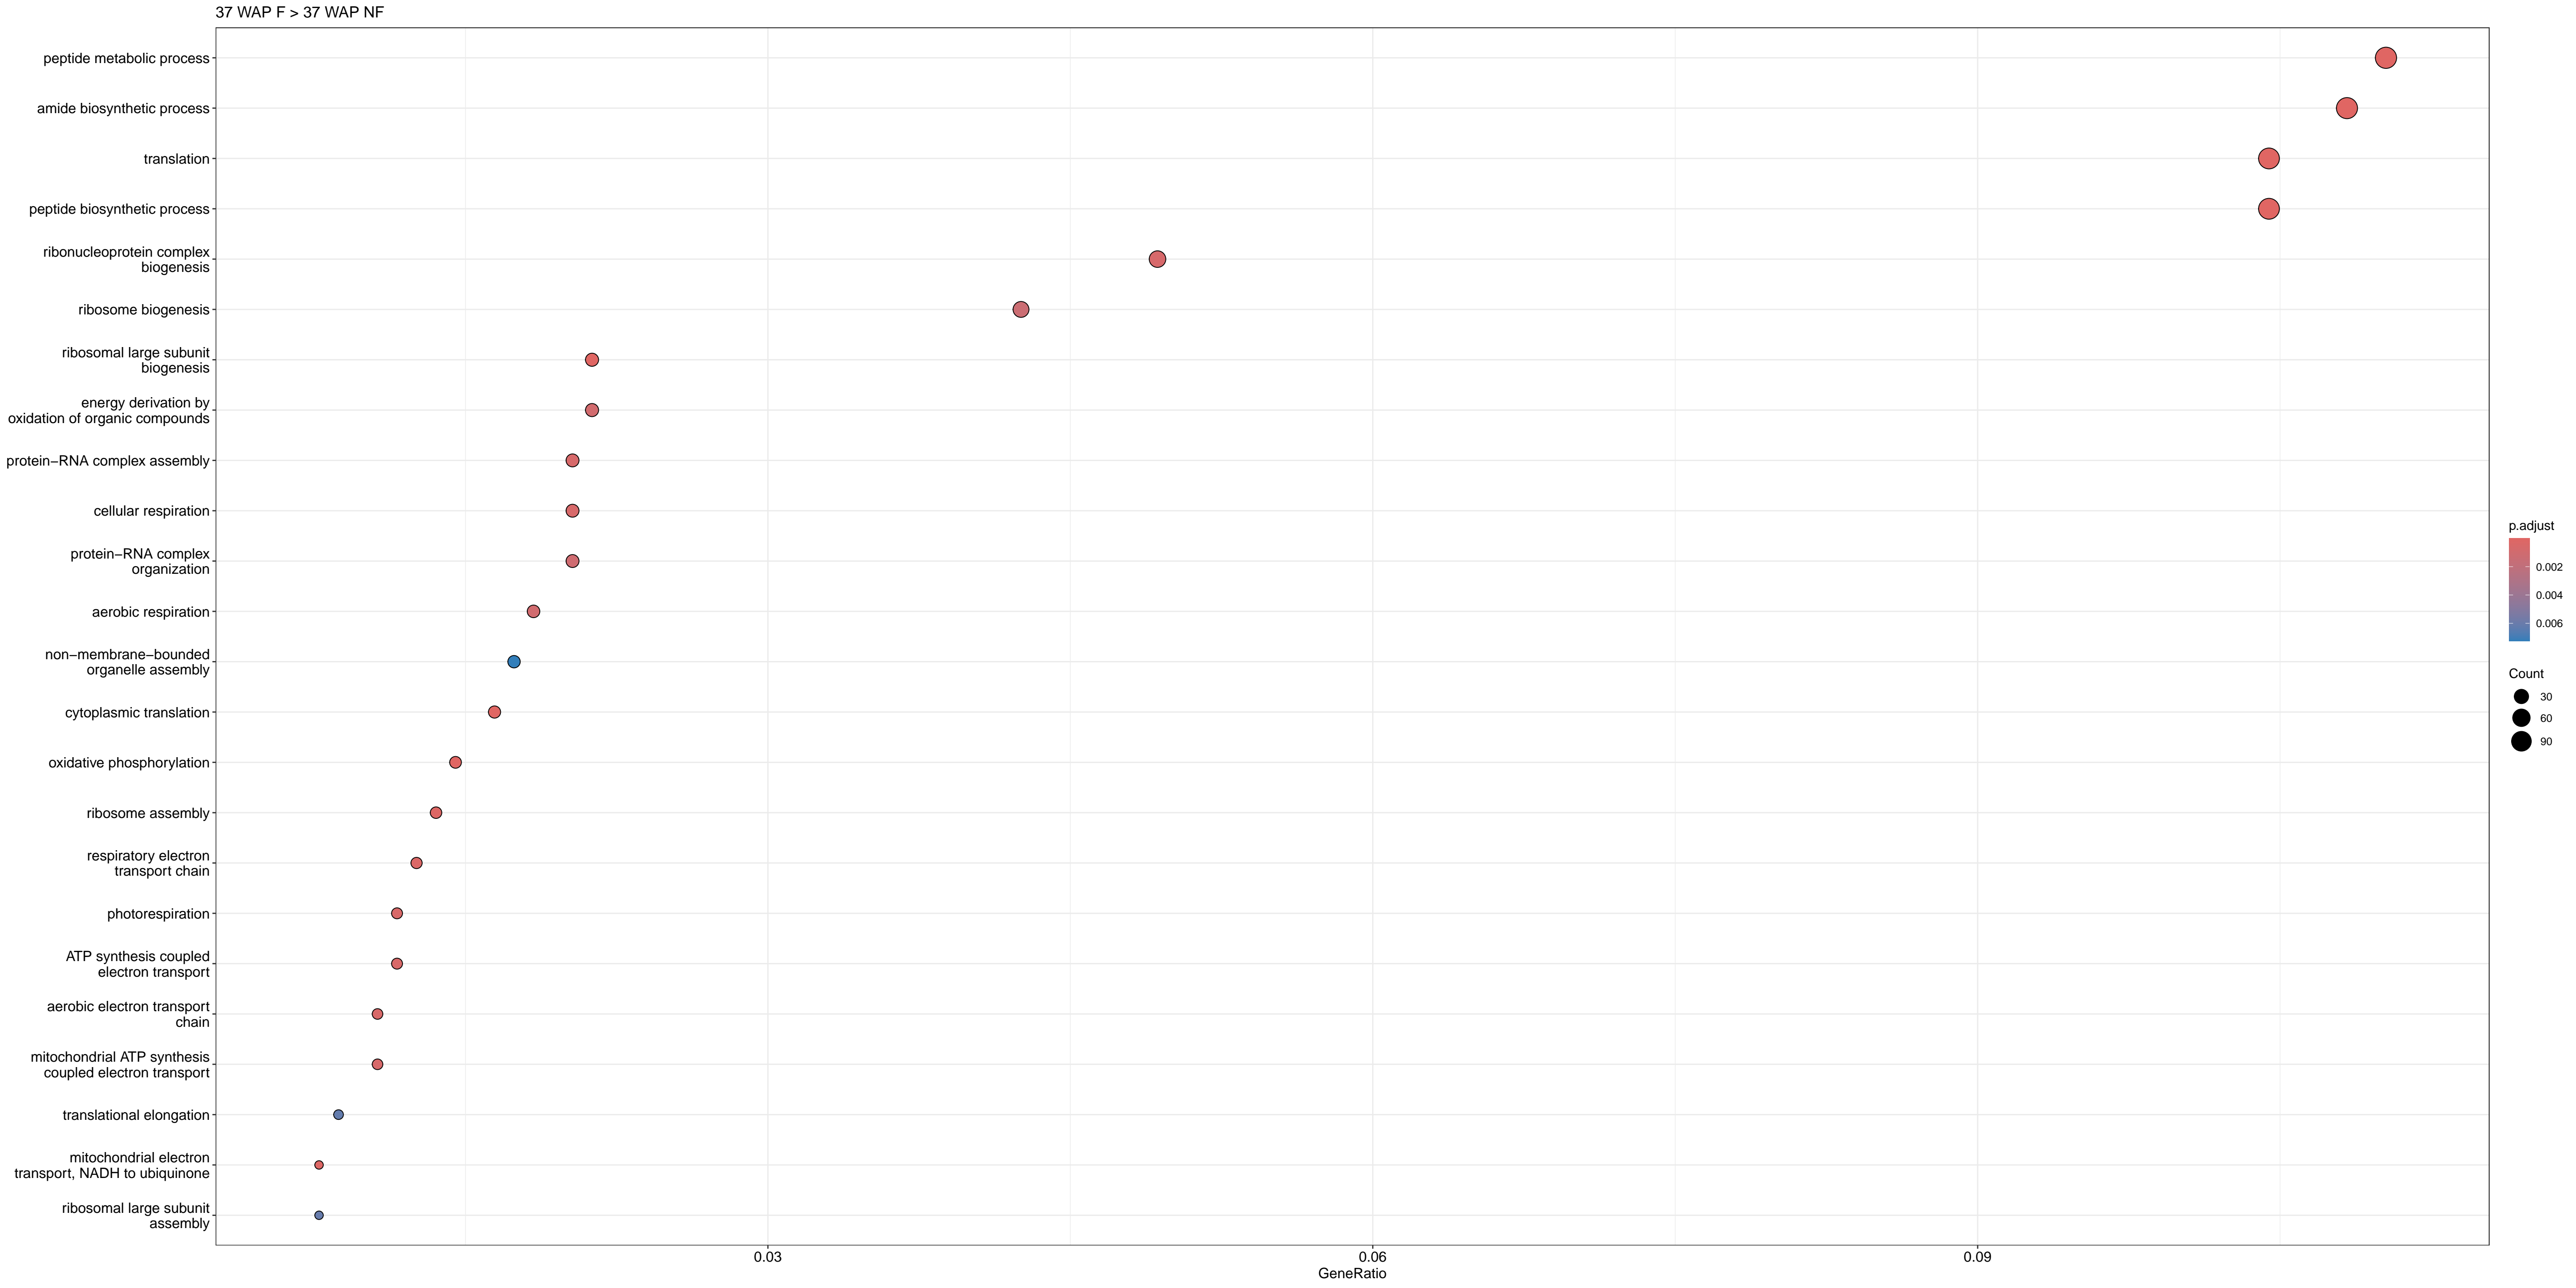

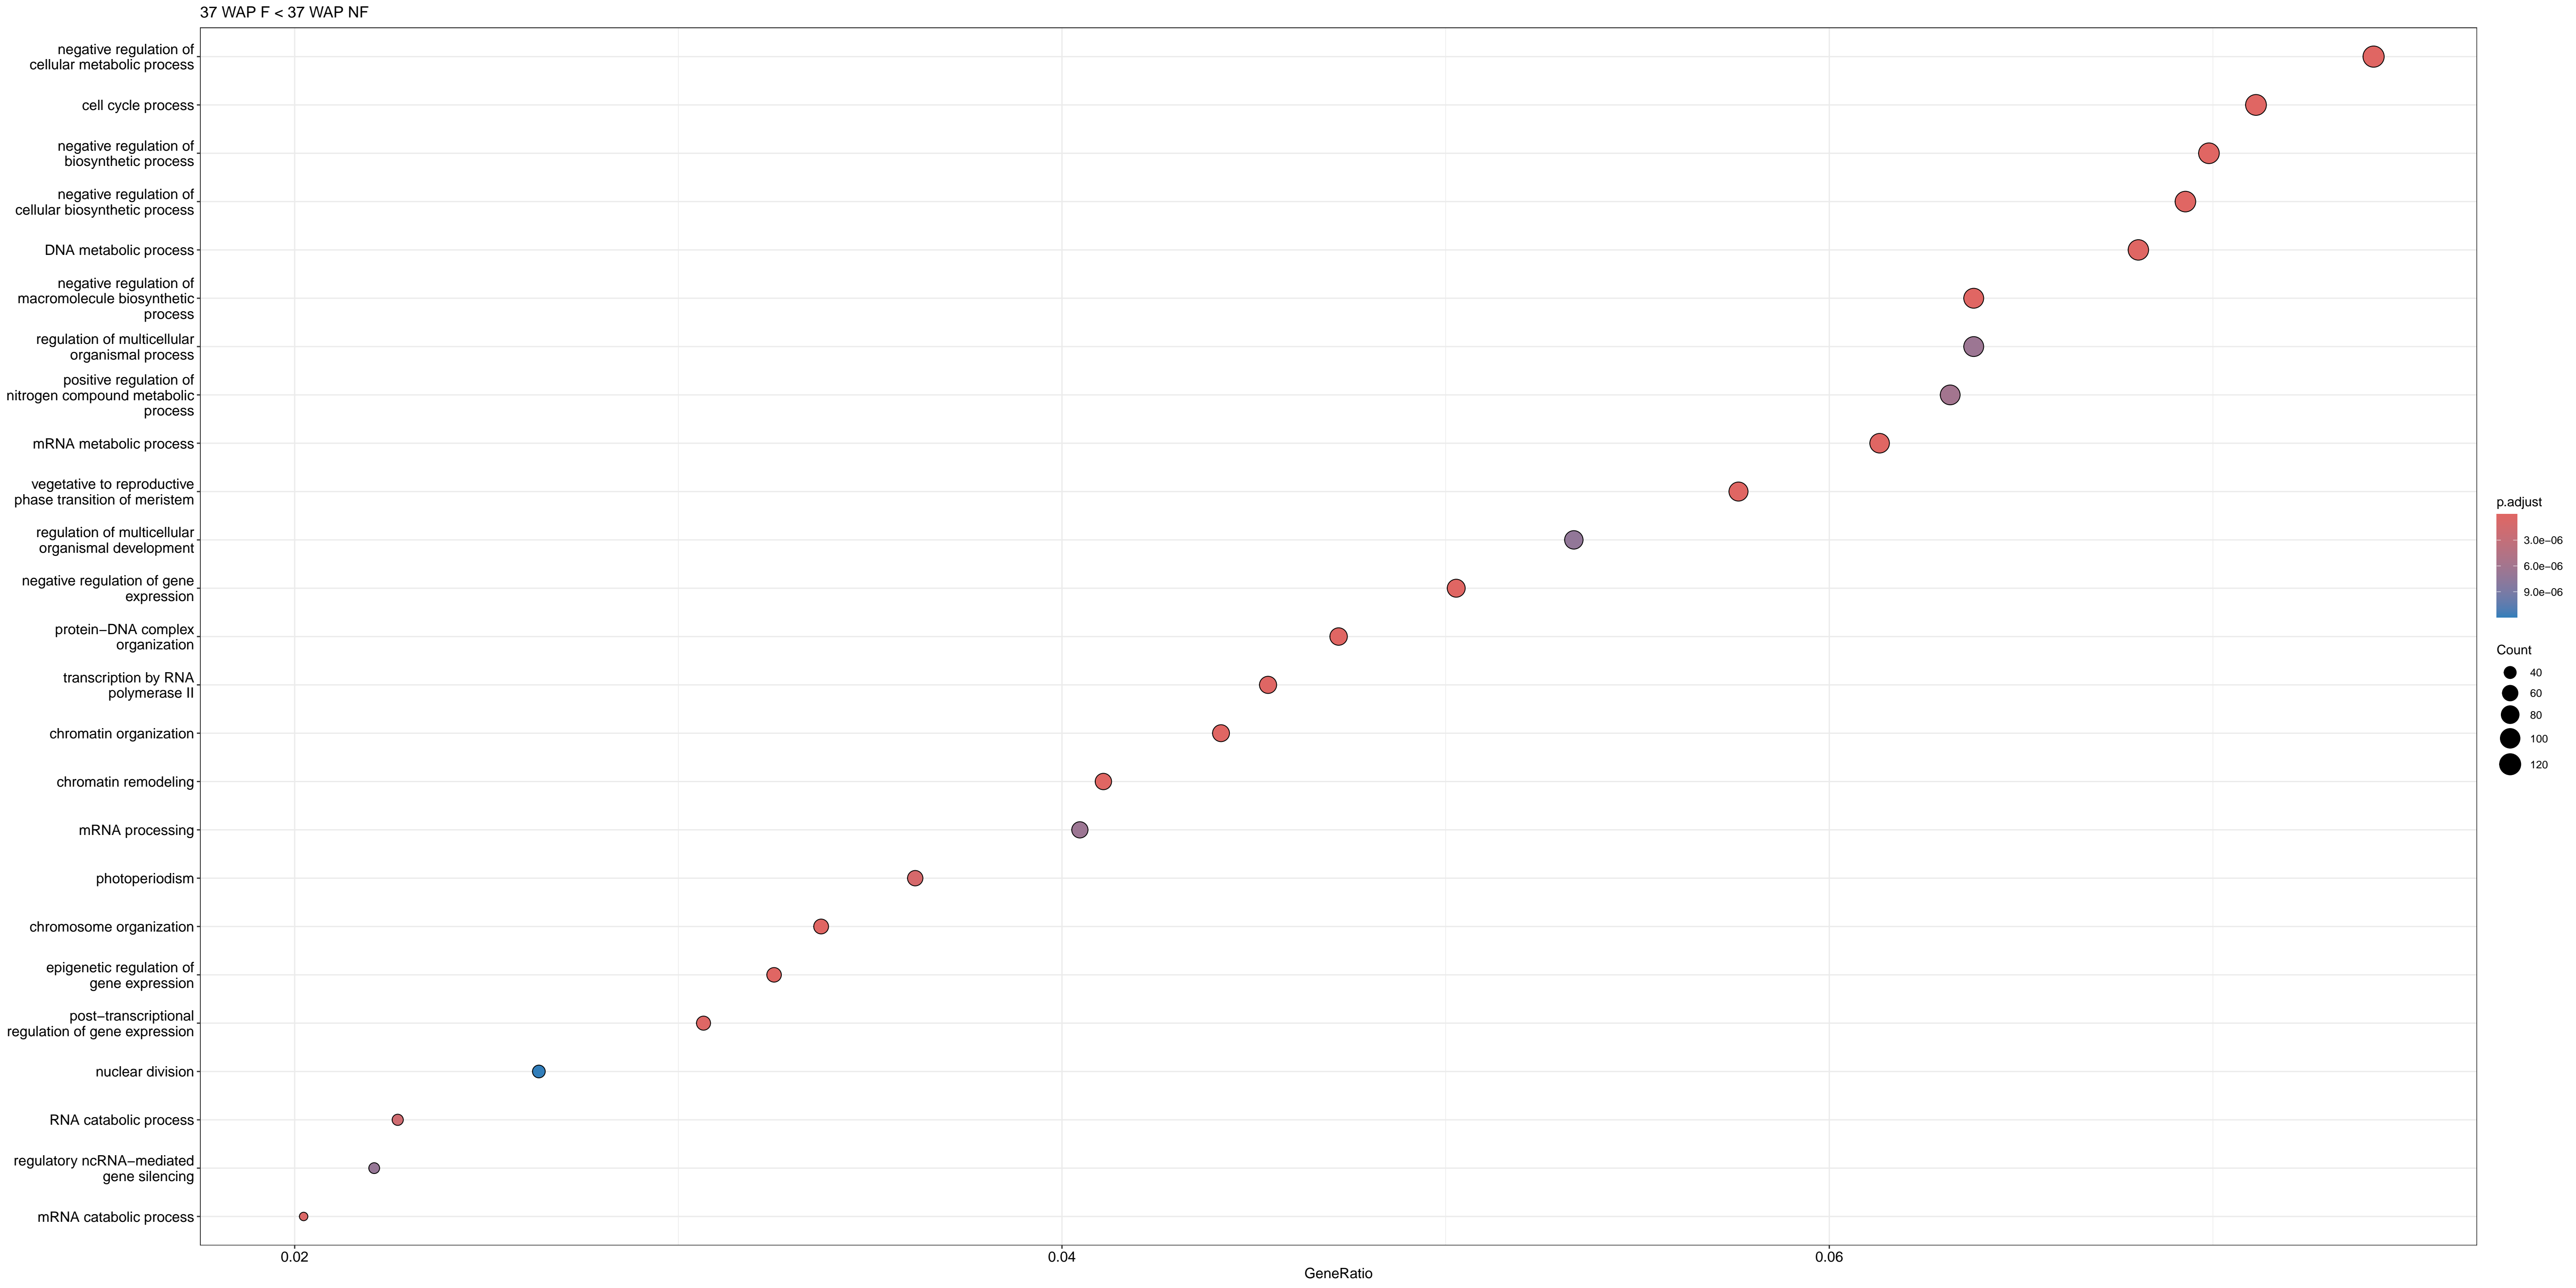

Supplement: MOESM2 [file 13062_2025_625_MOESM2_ESM.pdf]
